# Supplementary material for: Influence of Canonical and Non-Canonical IFNLR1 Isoform Expression on Interferon Lambda Signaling
Source: Viruses. 2023 Feb 25;15(3):632. doi: 10.3390/v15030632 (PMC10052089; doi:10.3390/v15030632)
Supplement: Supplementary file 1 [file viruses-15-00632-s001.zip › viruses-2168574-supplementary.xlsx]

## Sheet: Sheet1
	Abbreviation list and guide for data tabs
	ND = no doxycycline
	D= + doxycycline
	L3= + IFNL3
	NL3= no IFNL3
	WT = WT HEK293T cells
	EV= HEK293T-empty vector cells
	Iso1 = HEK293T-FLAG-Iso1 cells
	Iso2 = HEK293T-FLAG-Iso2 cells
	Iso3= HEK293T-FLAG-Iso3 cells
	R1 = replicate 1
	R2 = replicate 2

## Sheet: NanoString_Normalized Data
Sample Name							WT: ND / NL3	WT: D / NL3	WT: ND / L3	WT: D / L3	EV: ND / NL3	EV: D / NL3	EV: ND / L3	EV: D / L3	Iso1: ND / NL3	Iso1: D / NL3 (R1)	Iso1: D / NL3 (R2)	Iso1: ND / L3	Iso1: D / L3 (R1)	Iso1: D / L3 (R2)	Iso2: ND / NL3	Iso2: D / NL3 (R1)	Iso2: D / NL3 (R2)	Iso2: ND / L3	Iso2: D / L3 (R1)	Iso2: D / L3 (R2)	Iso3: ND / NL3	Iso3: D / NL3	Iso3: ND / L3	Iso3: D / L3
ABCB1		NM_000927.3	NM_000927.3:3910	Endogenous	mRNA	100	248.81	222.56	198	254.38	444.23	529.11	437.82	479.06	327.27	272.29	333.32	324.5	260.37	369.62	345.62	335.62	372.68	347.49	328.96	414.63	322.1	359.93	305.61	363.06
ABL1		NM_005157.3	NM_005157.3:3200	Endogenous	mRNA	100	864.89	772.42	785.87	765.29	689.45	667.21	785.45	855.89	835.42	818.83	819.59	830.61	789.37	795.92	877.08	862.6	932.05	1007.34	822.39	888.69	919.13	889.41	915.43	913
ADA		NM_000022.2	NM_000022.2:1300	Endogenous	mRNA	100	294.22	322.93	293.94	320.65	289.64	297.73	321.32	272.6	327.27	362.4	327.15	314.48	334.76	290.41	266.78	304.71	293.88	280.52	364.71	278.7	298.96	323.8	340.25	326.36
AHR		NM_001621.3	NM_001621.3:1900	Endogenous	mRNA	100	706.92	737.51	634.82	692.61	813.83	755.1	783.57	825.82	556.01	695.42	573.37	528.82	644.72	596.36	589.18	733.06	639.59	651.22	743.73	620.24	634.41	665.67	672.89	668.06
AICDA		NM_020661.1	NM_020661.1:567	Endogenous	mRNA	100	5.92	5.82	8.16	6.41	1.78	3.59	3.76	12.03	9.15	11.75	10.97	8.01	14.46	10.09	6.34	8.83	10.65	8.62	12.51	10.93	12.46	11.12	12.47	10.01
AIRE		NM_000383.2	NM_000383.2:1864	Endogenous	mRNA	100	13.82	2.91	12.25	4.28	15.99	7.17	13.15	10.02	11.96	15.67	13.03	23.37	16.53	17.08	9.85	7.36	5.68	25.2	10.73	19.13	18.69	25.01	15.25	10.01
APP		NM_000484.3	NM_000484.3:1725	Endogenous	mRNA	100	5558.62	6062.99	5578.65	6038.96	4822.56	5348.46	5094.17	5253.61	5036.47	6035.43	5019.72	5327.55	6017.43	4968.1	5033.69	6292.83	5173.48	4914.66	6228.75	4977.64	4883.07	5313.53	5277.06	5392.55
ARG1		NM_000045.2	NM_000045.2:505	Endogenous	mRNA	100	9.87	10.18	14.29	6.41	8.88	5.38	5.64	12.03	9.15	11.75	4.12	5.34	22.73	8.54	7.04	11.78	4.26	9.95	7.15	5.46	10.68	2.78	4.85	6.67
ARG2		NM_001172.3	NM_001172.3:1150	Endogenous	mRNA	100	485.76	536.77	553.17	575.04	582.83	604.44	631.37	645.43	709.44	632.73	632.35	598.26	615.79	678.67	547.65	394.5	501.16	474.16	529.19	551.93	557	538.51	471.92	547.26
ARHGDIB		NM_001175.4	NM_001175.4:833	Endogenous	mRNA	100	3.95	2.91	8.16	2.14	3.55	12.56	5.64	4.01	6.33	7.84	8.23	4.01	10.33	6.21	3.52	13.25	6.39	7.29	7.15	6.15	8.9	9.03	9.7	6.67
ATG10		NM_001131028.1	NM_001131028.1:985	Endogenous	mRNA	100	256.7	305.48	275.56	260.8	243.44	292.35	296.89	274.61	193.55	329.1	217.41	199.64	239.71	195.68	194.28	298.82	237.8	214.2	296.78	224.05	250.92	263.35	226.61	243.6
ATG12		NM_004707.2	NM_004707.2:25	Endogenous	mRNA	100	152.05	162.92	187.79	145.36	200.79	163.22	221.73	150.33	153.43	168.47	163.23	154.24	198.38	158.41	183.02	163.39	163.98	181.71	232.42	194.68	177.06	161.9	114.34	146.16
ATG16L1		NM_198890.2	NM_198890.2:1975	Endogenous	mRNA	100	657.56	654.59	626.65	607.1	682.34	782	723.44	729.61	793.2	544.58	740.72	796.56	675.72	743.89	896.08	659.46	829.83	892.61	670.43	873.67	920.91	850.5	891.87	894.31
ATG5		NM_004849.2	NM_004849.2:1104	Endogenous	mRNA	100	1660.68	1537.57	1569.7	1549.82	1773.37	1720.04	1721.23	1966.35	1453.37	1749.31	1360.72	1345.41	1531.22	1402.37	1478.92	1622.15	1441.02	1474.2	1705.58	1542.41	1497.49	1502.27	1467.04	1514.32
ATG7		NM_001136031.2	NM_001136031.2:810	Endogenous	mRNA	100	418.62	472.76	479.69	515.18	298.52	353.34	349.51	332.74	449.74	460.35	461.58	461.38	580.67	472.12	441.35	547.59	479.87	496.04	556.01	456.3	444	450.96	444.89	486.53
ATM		NM_000051.3	NM_000051.3:30	Endogenous	mRNA	100	25.67	32	26.54	25.65	19.55	12.56	30.07	28.06	31.67	27.42	18.52	24.7	26.86	18.64	23.93	30.91	22.72	21.22	23.24	28.01	18.69	22.24	14.55	28.03
B2M		NM_004048.2	NM_004048.2:235	Endogenous	mRNA	100	9105.08	8822.47	8954.83	9444.3	10682.8	10858.3	11039.6	11916.3	7836.23	9490.96	8066.94	27895	30488	27669.3	8832.72	10520.4	9216.15	19880.1	12917	11276.4	8083.58	7915.06	10109.2	11331
B3GAT1		NM_018644.3	NM_018644.3:2388	Endogenous	mRNA	100	9.87	7.27	10.21	12.83	12.44	10.76	11.27	20.04	14.78	15.67	15.09	10.02	12.4	16.31	10.56	5.89	10.65	13.26	1.79	8.88	16.02	12.51	12.47	11.35
BATF		NM_006399.3	NM_006399.3:293	Endogenous	mRNA	100	3.95	8.73	10.21	6.41	5.33	3.59	5.64	6.01	1.41	5.88	4.8	3.34	4.13	13.2	8.45	4.42	4.97	7.96	8.94	6.15	8.9	7.64	9.01	4
BATF3		NM_018664.2	NM_018664.2:770	Endogenous	mRNA	100	537.1	520.77	540.92	495.94	357.16	261.86	264.95	268.59	572.9	376.11	438.94	626.97	588.93	611.89	565.24	438.66	473.48	534.5	464.83	552.62	519.63	485.01	435.19	495.21
BAX		NM_138761.3	NM_138761.3:342	Endogenous	mRNA	100	3060.7	3152.23	3172.05	3127.43	3553.84	4270.52	3775.06	4503.95	5574.19	5232.27	6847.5	5890.42	5133	7096.5	4755.65	3783.06	5135.15	4817.17	3788.38	5207.16	4899.08	6193.91	4863.35	6025.24
BCAP31		NM_005745.7	NM_005745.7:495	Endogenous	mRNA	100	7799.85	7764.94	7664.78	7894.47	9227.55	9357.11	9168	9400.77	9419.81	7759.27	8953.74	9172.81	8017.73	8943.82	8778.52	7801.63	8772.48	8639.61	8127.4	9135.59	11477.2	11480.3	11572.1	10974.6
BCL10		NM_003921.2	NM_003921.2:1250	Endogenous	mRNA	100	1443.47	1421.2	1453.35	1447.21	1688.07	1689.55	1734.39	1697.75	1063.46	1451.56	1026.71	1123.73	1566.35	1146.9	1148.08	1623.62	1220.96	1230.16	1626.91	1236.38	1197.63	1259.07	1227.96	1309.43
BCL2		NM_000657.2	NM_000657.2:947	Endogenous	mRNA	100	69.11	53.82	57.15	61.99	78.18	93.27	88.32	120.27	93.61	80.32	76.13	80.79	105.39	71.44	84.47	94.21	97.25	89.53	110.84	91.53	72.07	77.13	62.37	66.74
BCL2L11		NM_138621.4	NM_138621.4:257	Endogenous	mRNA	100	205.36	203.65	216.37	179.57	197.24	181.15	180.39	182.4	287.16	197.85	284.63	309.14	247.97	310.6	292.83	222.27	335.77	356.78	219.9	300.56	266.04	264.74	333.32	287.65
BCL3		NM_005178.2	NM_005178.2:450	Endogenous	mRNA	100	3.95	5.82	12.25	12.83	19.55	25.11	26.31	26.06	14.08	9.79	15.09	14.69	28.93	24.85	14.78	16.19	12.78	15.25	16.09	12.3	23.13	18.76	18.71	20.02
BCL6		NM_001706.2	NM_001706.2:675	Endogenous	mRNA	100	75.04	45.09	51.03	51.3	88.85	60.98	56.37	76.17	34.49	56.81	34.29	26.04	41.33	24.85	33.79	61.82	50.4	48.41	69.72	41.67	48.05	45.86	47.12	41.38
BID		NM_001196.2	NM_001196.2:1875	Endogenous	mRNA	100	17.77	26.18	24.49	34.2	19.55	17.94	7.52	24.05	30.97	29.38	21.26	23.37	28.93	24.07	18.3	26.5	20.59	22.55	33.97	19.13	32.03	27.79	20.1	24.03
BLNK		NM_013314.2	NM_013314.2:930	Endogenous	mRNA	100	5.92	13.09	10.21	14.96	10.66	10.76	13.15	14.03	9.15	19.59	15.09	21.37	20.66	25.62	15.49	17.66	11.36	17.24	14.3	13.66	14.24	18.07	18.02	16.02
BST1		NM_004334.2	NM_004334.2:710	Endogenous	mRNA	100	19.75	18.91	16.33	29.93	21.32	35.87	28.19	38.08	31.67	25.47	27.43	30.05	22.73	28.73	34.49	29.44	28.39	28.52	19.67	45.77	31.14	31.96	32.57	32.03
BST2		NM_004335.2	NM_004335.2:560	Endogenous	mRNA	100	9.87	16	20.41	36.34	3.55	16.14	9.4	24.05	6.33	7.84	8.23	1350.75	1746.13	1345.69	7.04	13.25	9.94	559.04	114.42	76.51	11.57	6.95	185.72	284.31
BTK		NM_000061.1	NM_000061.1:570	Endogenous	mRNA	100	11.85	11.64	6.12	14.96	8.88	7.17	7.52	10.02	9.85	13.71	8.23	6.68	20.66	6.21	12.67	14.72	9.23	7.96	17.88	12.98	10.68	9.73	7.62	7.34
BTLA		NM_181780.2	NM_181780.2:305	Endogenous	mRNA	100	7.9	8.73	14.29	10.69	10.66	16.14	16.91	14.03	16.89	19.59	13.03	22.03	16.53	24.85	16.89	8.83	12.78	19.89	12.51	17.08	26.69	21.54	19.4	18.02
C14orf166		NM_016039.2	NM_016039.2:210	Endogenous	mRNA	100	12691	12763.1	12333	11836.4	12569.9	12494.1	12531.5	12437.5	16203.1	18923.2	16552.2	16269.1	17806.4	15728.2	11320.4	12529.7	11355.7	11379.8	12571.9	10897.3	11126.6	11102.3	11151.5	11184.2
C1QA		NM_015991.2	NM_015991.2:718	Endogenous	mRNA	100	13.82	18.91	10.21	10.69	12.44	12.56	15.03	30.07	15.48	5.88	13.72	16.69	22.73	15.53	8.45	16.19	17.75	18.57	25.03	18.44	28.47	21.54	13.86	16.02
C1QB		NM_000491.3	NM_000491.3:819	Endogenous	mRNA	100	17.77	10.18	12.25	10.69	12.44	10.76	20.67	22.05	26.04	5.88	17.83	20.7	20.66	26.4	17.6	14.72	12.78	17.24	12.51	15.03	23.13	20.15	18.02	17.35
C1QBP		NM_001212.3	NM_001212.3:745	Endogenous	mRNA	100	36726.4	37709	36827.7	37140.2	36206.5	33826.9	37230.1	33349.7	22512.1	21516.8	19737.3	21228.7	21412.3	20424.5	29515.1	31028.4	28654.3	29418.3	32388	29169.8	33587.1	30693.7	32618	30747.6
C1R		NM_001733.4	NM_001733.4:760	Endogenous	mRNA	100	17.77	18.91	16.33	25.65	24.88	35.87	26.31	34.08	14.78	9.79	23.32	32.72	33.06	29.51	19.01	25.02	23.43	20.56	19.67	21.18	24.91	29.88	24.95	30.7
C1S		NM_001734.2	NM_001734.2:775	Endogenous	mRNA	100	19.75	16	22.45	17.1	23.1	3.59	15.03	16.04	18.3	23.51	20.58	21.37	20.66	21.74	8.45	16.19	20.59	12.6	12.51	15.03	17.8	19.46	18.02	20.69
C2		NM_000063.3	NM_000063.3:1075	Endogenous	mRNA	100	17.77	17.46	6.12	8.55	17.77	14.35	18.79	38.08	14.08	25.47	26.06	54.08	39.26	52.03	19.01	19.14	17.75	18.57	7.15	16.39	21.35	18.07	15.94	22.02
C3		NM_000064.2	NM_000064.2:4396	Endogenous	mRNA	100	5.92	5.82	8.16	6.41	10.66	16.14	9.4	12.03	7.74	19.59	5.49	15.36	6.2	7.77	11.26	10.3	12.07	13.26	7.15	12.98	15.13	5.56	12.47	10.68
C4A/B		NM_007293.2	NM_007293.2:1217	Endogenous	mRNA	100	15.8	7.27	12.25	17.1	8.88	12.56	9.4	6.01	13.37	11.75	11.66	24.04	16.53	13.98	9.15	8.83	19.88	18.57	8.94	14.34	18.69	16.68	14.55	14.02
C4BPA		NM_000715.3	NM_000715.3:690	Endogenous	mRNA	100	5.92	2.91	4.08	2.14	5.33	5.38	7.52	6.01	11.96	5.88	9.6	9.35	4.13	6.99	6.34	11.78	5.68	7.29	1.79	2.73	8.9	12.51	11.09	7.34
C5		NM_001735.2	NM_001735.2:2592	Endogenous	mRNA	100	17.77	16	10.21	12.83	19.55	28.7	30.07	14.03	30.97	27.42	26.75	26.04	12.4	20.97	23.93	23.55	12.78	27.19	8.94	24.59	34.7	34.05	28.41	33.37
C6		NM_000065.2	NM_000065.2:3170	Endogenous	mRNA	100	17.77	8.73	12.25	17.1	14.22	12.56	11.27	10.02	16.89	7.84	28.12	26.71	10.33	12.42	19.01	16.19	23.43	17.91	10.73	15.03	26.69	25.71	26.33	18.02
C7		NM_000587.2	NM_000587.2:310	Endogenous	mRNA	100	3.95	13.09	2.04	4.28	7.11	12.56	7.52	14.03	7.04	11.75	8.92	7.34	12.4	6.21	8.45	13.25	7.81	8.62	5.36	14.34	8.9	6.95	6.93	8.68
C8A		NM_000562.2	NM_000562.2:690	Endogenous	mRNA	100	7.9	10.18	14.29	10.69	1.78	5.38	11.27	18.04	8.45	7.84	5.49	8.68	14.46	8.54	5.63	7.36	5.68	11.27	10.73	13.66	3.56	4.86	13.17	12.68
C8B		NM_000066.2	NM_000066.2:620	Endogenous	mRNA	100	1.97	4.36	8.16	4.28	3.55	1.79	3.76	6.01	7.04	3.92	4.12	12.69	4.13	8.54	4.93	5.89	5.68	6.63	1.79	9.56	6.23	4.17	7.62	5.34
C8G		NM_000606.2	NM_000606.2:407	Endogenous	mRNA	100	7.9	8.73	4.08	6.41	7.11	14.35	7.52	6.01	9.85	5.88	13.03	6.01	10.33	13.98	15.49	5.89	11.36	12.6	7.15	16.39	15.13	16.68	9.01	8.68
C9		NM_001737.3	NM_001737.3:602	Endogenous	mRNA	100	5.92	1.45	4.08	6.41	7.11	8.97	3.76	10.02	8.45	9.79	6.86	8.01	12.4	10.09	9.85	7.36	7.81	4.64	3.58	9.56	13.35	9.03	11.09	8.68
CAMP		NM_004345.3	NM_004345.3:220	Endogenous	mRNA	100	1.97	2.91	2.04	4.28	3.55	5.38	1.88	6.01	3.52	3.92	6.86	9.35	4.13	6.99	7.74	4.42	5.68	6.63	1.79	10.25	7.12	10.42	6.93	7.34
CARD9		NM_052813.4	NM_052813.4:1525	Endogenous	mRNA	100	3.95	20.37	14.29	21.38	7.11	14.35	13.15	14.03	9.85	9.79	11.66	11.35	14.46	12.42	10.56	13.25	12.78	15.25	14.3	18.44	11.57	15.98	13.86	12.01
CASP1		NM_001223.3	NM_001223.3:971	Endogenous	mRNA	100	1.97	11.64	4.08	10.69	1.78	7.17	3.76	6.01	9.85	3.92	5.49	13.35	4.13	8.54	11.97	8.83	7.1	9.28	1.79	6.83	8.01	6.25	7.62	8.01
CASP10		NM_032977.3	NM_032977.3:20	Endogenous	mRNA	100	1.97	7.27	6.12	12.83	1.78	1.79	5.64	4.01	5.63	3.92	4.8	6.68	8.27	10.09	1.41	8.83	4.97	11.94	3.58	10.93	13.35	6.25	11.09	9.34
CASP2		NM_032982.2	NM_032982.2:1710	Endogenous	mRNA	100	1840.37	1902.69	1722.79	1825.58	1878.2	2125.39	1905.38	2032.49	2007.97	1780.66	2167.28	2292.2	1830.85	2381.55	2605.19	2258.06	2740.07	2876.78	2215.1	2741.91	2475.34	2635.57	2542.55	2756.34
CASP3		NM_032991.2	NM_032991.2:685	Endogenous	mRNA	100	527.23	532.4	540.92	542.97	529.52	552.42	531.78	551.22	471.55	425.09	460.89	506.11	419.48	483.76	696.88	643.27	699.92	729.47	647.19	747.98	635.3	643.43	671.5	680.08
CASP8		NM_001228.4	NM_001228.4:301	Endogenous	mRNA	100	223.13	176.01	208.2	218.04	287.86	283.39	246.16	256.57	251.26	235.07	305.89	445.35	336.83	469.01	330.84	241.41	376.23	410.49	269.96	409.17	336.33	365.49	385.3	426.47
CCBP2		NM_001296.3	NM_001296.3:1345	Endogenous	mRNA	100	21.72	5.82	10.21	10.69	8.88	12.56	9.4	10.02	14.08	19.59	11.66	8.01	14.46	10.87	9.15	17.66	12.07	10.61	3.58	10.93	17.8	15.98	14.55	20.69
CCL11		NM_002986.2	NM_002986.2:378	Endogenous	mRNA	100	9.87	16	10.21	10.69	14.22	3.59	13.15	14.03	11.96	7.84	7.54	10.02	4.13	17.08	11.26	5.89	8.52	14.59	10.73	10.25	18.69	11.12	11.09	8.01
CCL13		NM_005408.2	NM_005408.2:320	Endogenous	mRNA	100	5.92	2.91	4.08	6.41	5.33	3.59	5.64	2	9.15	5.88	8.92	4.01	4.13	10.87	7.74	4.42	4.26	5.31	8.94	12.98	12.46	5.56	6.93	9.34
CCL15		NM_032965.3	NM_032965.3:112	Endogenous	mRNA	100	3.95	7.27	8.16	6.41	8.88	5.38	3.76	2	5.63	9.79	7.54	9.35	6.2	6.99	6.34	7.36	9.23	4.64	7.15	8.88	15.13	5.56	5.54	4.67
CCL16		NM_004590.2	NM_004590.2:367	Endogenous	mRNA	100	9.87	7.27	12.25	8.55	5.33	8.97	11.27	14.03	7.74	9.79	4.12	7.34	10.33	5.44	3.52	13.25	4.26	8.62	10.73	8.2	7.12	6.95	6.93	6.67
CCL18		NM_002988.2	NM_002988.2:585	Endogenous	mRNA	100	5.92	5.82	2.04	12.83	1.78	5.38	3.76	4.01	7.74	3.92	6.86	6.68	8.27	11.65	6.34	4.42	4.97	6.63	1.79	6.15	9.79	13.2	5.54	5.34
CCL19		NM_006274.2	NM_006274.2:401	Endogenous	mRNA	100	11.85	4.36	8.16	6.41	3.55	3.59	7.52	2	7.74	1.96	5.49	6.01	4.13	9.32	7.04	5.89	7.1	5.31	5.36	12.3	13.35	5.56	9.01	8.68
CCL2		NM_002982.3	NM_002982.3:123	Endogenous	mRNA	100	7.9	14.55	8.16	6.41	8.88	10.76	7.52	8.02	2.11	3.92	1.37	8.01	6.2	3.11	4.22	4.42	4.26	7.96	7.15	4.78	9.79	4.86	2.08	10.01
CCL20		NM_004591.1	NM_004591.1:35	Endogenous	mRNA	100	7.9	4.36	8.16	8.55	5.33	7.17	3.76	6.01	9.15	3.92	10.29	12.69	10.33	14.75	13.37	7.36	12.07	15.92	3.58	14.34	16.02	10.42	10.39	6.67
CCL22		NM_002990.3	NM_002990.3:797	Endogenous	mRNA	100	5.92	11.64	12.25	10.69	7.11	3.59	9.4	14.03	10.56	17.63	13.03	10.68	6.2	11.65	9.85	2.94	13.49	13.26	23.24	17.76	17.8	17.37	16.63	14.02
CCL23		NM_145898.1	NM_145898.1:336	Endogenous	mRNA	95.83	1.97	4.36	4.08	4.28	1.78	5.38	5.64	4.01	3.52	3.92	4.8	4.67	4.13	1	2.82	2.94	4.26	3.32	16.09	4.78	3.56	3.47	2.77	4.67
CCL24		NM_002991.2	NM_002991.2:18	Endogenous	mRNA	100	9.87	14.55	12.25	12.83	15.99	10.76	13.15	18.04	18.3	7.84	13.03	18.7	10.33	11.65	11.97	16.19	12.07	21.88	17.88	24.59	21.35	17.37	24.95	16.68
CCL26		NM_006072.4	NM_006072.4:184	Endogenous	mRNA	100	3.95	2.91	8.16	12.83	5.33	1.79	5.64	4.01	7.04	7.84	6.17	7.34	6.2	6.21	11.26	8.83	9.23	7.29	16.09	10.25	10.68	13.2	11.09	9.34
CCL3		NM_002983.2	NM_002983.2:159	Endogenous	mRNA	100	5.92	7.27	2.04	6.41	5.33	3.59	3.76	4.01	5.63	3.92	8.92	7.34	2.07	5.44	7.74	4.42	7.81	9.28	5.36	4.78	8.01	4.86	7.62	6.01
CCL4		NM_002984.2	NM_002984.2:35	Endogenous	mRNA	100	5.92	11.64	18.37	6.41	24.88	12.56	15.03	16.04	19	9.79	10.29	7.34	12.4	8.54	14.08	7.36	17.04	15.92	12.51	13.66	17.8	13.9	14.55	10.68
CCL5		NM_002985.2	NM_002985.2:280	Endogenous	mRNA	100	3.95	5.82	2.04	2.14	3.55	3.59	7.52	2	5.63	9.79	13.03	7.34	6.2	10.87	8.45	1.47	6.39	11.27	1.79	11.61	8.9	5.56	12.47	4.67
CCL7		NM_006273.2	NM_006273.2:120	Endogenous	mRNA	100	11.85	7.27	2.04	8.55	7.11	16.14	11.27	8.02	7.04	5.88	6.86	8.01	10.33	8.54	2.11	5.89	7.1	7.29	3.58	10.93	8.01	4.86	9.01	9.34
CCL8		NM_005623.2	NM_005623.2:689	Endogenous	mRNA	100	7.9	4.36	4.08	12.83	1.78	7.17	7.52	12.03	2.82	9.79	4.12	4.67	4.13	4.66	4.22	2.94	7.1	3.98	7.15	4.1	8.01	4.17	6.24	4.67
CCND3		NM_001760.2	NM_001760.2:1215	Endogenous	mRNA	100	489.71	522.22	451.11	453.19	634.36	740.75	625.73	603.33	527.86	532.83	561.71	585.57	553.8	614.22	566.65	604.99	615.45	590.87	688.31	588.82	590.81	521.83	556.46	541.26
CCR1		NM_001295.2	NM_001295.2:535	Endogenous	mRNA	100	13.82	20.37	16.33	14.96	24.88	26.9	28.19	36.08	28.86	27.42	18.52	20.7	18.6	16.31	23.93	19.14	19.88	29.84	25.03	31.42	44.49	31.96	28.41	30.7
CCR10		NM_016602.2	NM_016602.2:843	Endogenous	mRNA	100	17.77	8.73	6.12	6.41	10.66	5.38	5.64	20.04	7.74	7.84	6.17	9.35	6.2	10.09	9.15	10.3	12.78	11.27	17.88	10.25	9.79	9.73	9.01	12.01
CCR2		NM_001123041.2	NM_001123041.2:743	Endogenous	mRNA	100	7.9	8.73	4.08	6.41	8.88	10.76	1.88	6.01	8.45	5.88	8.23	7.34	10.33	7.77	5.63	7.36	8.52	7.29	12.51	10.25	14.24	3.47	5.54	4.67
CCR5		NM_000579.1	NM_000579.1:2730	Endogenous	mRNA	100	1.97	14.55	16.33	2.14	21.32	10.76	28.19	14.03	14.08	7.84	8.23	10.02	12.4	7.77	12.67	5.89	7.81	7.96	12.51	10.25	12.46	11.12	3.46	8.01
CCR6		NM_031409.2	NM_031409.2:935	Endogenous	mRNA	100	17.77	16	14.29	25.65	15.99	28.7	33.82	32.07	16.19	29.38	16.46	16.69	18.6	13.98	15.49	16.19	7.81	17.24	16.09	9.56	20.46	23.62	17.32	18.69
CCR7		NM_001838.2	NM_001838.2:1610	Endogenous	mRNA	100	13.82	10.18	10.21	21.38	1.78	17.94	3.76	12.03	8.45	9.79	8.92	10.02	20.66	10.09	8.45	8.83	14.91	9.28	14.3	12.3	11.57	7.64	5.54	11.35
CCR8		NM_005201.2	NM_005201.2:245	Endogenous	mRNA	100	3.95	7.27	2.04	2.14	7.11	3.59	11.27	8.02	7.74	1.96	6.17	3.34	4.13	3.88	7.74	4.42	7.1	5.97	12.51	7.51	10.68	9.03	6.93	8.68
CCRL1		NM_016557.2	NM_016557.2:854	Endogenous	mRNA	100	5.92	2.91	8.16	2.14	5.33	7.17	3.76	8.02	7.74	7.84	8.92	7.34	10.33	9.32	8.45	5.89	9.94	15.25	1.79	15.03	11.57	10.42	8.32	8.01
CCRL2		NM_003965.4	NM_003965.4:1110	Endogenous	mRNA	100	17.77	10.18	6.12	8.55	10.66	12.56	9.4	2	8.45	11.75	6.86	11.35	12.4	14.75	9.15	5.89	9.94	14.59	16.09	13.66	16.02	7.64	14.55	12.01
CD14		NM_000591.2	NM_000591.2:885	Endogenous	mRNA	100	5.92	5.82	4.08	6.41	3.55	5.38	13.15	8.02	12.67	13.71	13.72	12.02	8.27	12.42	8.45	4.42	9.94	8.62	7.15	11.61	8.9	13.9	11.78	16.02
CD160		NM_007053.2	NM_007053.2:500	Endogenous	mRNA	100	3.95	8.73	8.16	6.41	1.78	7.17	13.15	6.01	7.74	9.79	14.4	17.36	10.33	10.87	6.34	8.83	12.78	7.29	8.94	12.3	10.68	8.34	13.86	9.34
CD163		NM_004244.4	NM_004244.4:1630	Endogenous	mRNA	100	7.9	13.09	10.21	10.69	10.66	5.38	11.27	14.03	9.15	3.92	11.66	9.35	6.2	10.87	16.89	11.78	11.36	9.95	12.51	12.98	11.57	11.12	8.32	8.01
CD164		NM_006016.4	NM_006016.4:2575	Endogenous	mRNA	100	2245.17	2654.74	2396.39	2620.8	3182.46	3366.55	3198.19	3122.9	2834.25	2670.01	3120.61	3393.23	2663.62	3165.82	3487.9	3079.44	3564.93	3594.98	3085.77	3706.42	3296.6	3495.8	3673.5	3795.48
CD19		NM_001770.4	NM_001770.4:1770	Endogenous	mRNA	100	106.63	110.55	114.31	94.06	120.83	82.5	92.07	96.21	118.94	95.99	110.42	146.23	117.79	131.23	151.34	138.37	154.75	169.77	98.33	150.28	165.5	134.11	130.97	137.48
CD1A		NM_001763.2	NM_001763.2:1815	Endogenous	mRNA	100	11.85	5.82	8.16	12.83	5.33	12.56	7.52	16.04	9.85	11.75	5.49	6.68	18.6	13.98	8.45	13.25	8.52	13.93	8.94	15.71	8.01	13.9	10.39	14.02
CD1D		NM_001766.3	NM_001766.3:1428	Endogenous	mRNA	100	25.67	13.09	18.37	14.96	14.22	25.11	37.58	16.04	19.71	13.71	21.26	24.7	31	34.17	16.89	16.19	22.01	12.6	19.67	22.54	23.13	29.88	29.8	27.36
CD2		NM_001767.3	NM_001767.3:687	Endogenous	mRNA	100	1.97	2.91	2.04	14.96	8.88	3.59	5.64	12.03	14.08	7.84	4.12	12.02	8.27	13.2	10.56	10.3	8.52	5.97	12.51	2.73	6.23	4.17	8.32	9.34
CD209		NM_021155.2	NM_021155.2:1532	Endogenous	mRNA	100	5.92	7.27	2.04	6.41	5.33	7.17	3.76	8.02	7.74	5.88	8.92	12.02	6.2	7.77	7.74	4.42	12.07	10.61	16.09	7.51	14.24	11.81	7.62	9.34
CD22		NM_001771.2	NM_001771.2:2515	Endogenous	mRNA	100	7.9	7.27	8.16	12.83	8.88	7.17	9.4	8.02	6.33	15.67	8.23	8.01	22.73	11.65	7.74	11.78	7.81	9.95	14.3	8.88	8.01	7.64	8.32	10.68
CD24		NM_013230.2	NM_013230.2:95	Endogenous	mRNA	100	51.34	36.37	42.87	40.62	62.19	66.36	48.86	44.1	40.12	47.01	42.52	44.07	59.93	44.26	55.61	73.6	49.69	37.14	76.88	52.6	49.83	54.89	47.82	48.72
CD244		NM_016382.2	NM_016382.2:1150	Endogenous	mRNA	100	7.9	1.45	2.04	8.55	3.55	7.17	1.88	6.01	12.67	7.84	6.86	10.68	18.6	6.21	2.11	8.83	8.52	5.97	1.79	10.25	17.8	8.34	13.17	7.34
CD247		NM_198053.1	NM_198053.1:1490	Endogenous	mRNA	100	3.95	5.82	2.04	4.28	5.33	3.59	11.27	2	7.74	1.96	7.54	6.68	2.07	10.87	8.45	7.36	7.1	9.95	10.73	8.2	11.57	5.56	4.16	4.67
CD27		NM_001242.4	NM_001242.4:330	Endogenous	mRNA	100	9.87	14.55	4.08	2.14	3.55	5.38	7.52	16.04	4.22	11.75	10.29	8.01	10.33	8.54	2.82	11.78	4.26	8.62	8.94	8.2	12.46	7.64	4.85	4.67
CD274		NM_014143.3	NM_014143.3:1245	Endogenous	mRNA	100	9.87	2.91	6.12	4.28	8.88	5.38	11.27	8.02	7.74	1.96	4.8	25.37	12.4	18.64	7.04	4.42	6.39	8.62	1.79	6.83	12.46	9.03	4.16	12.01
CD276		NM_001024736.1	NM_001024736.1:2120	Endogenous	mRNA	100	2286.64	2072.88	2200.43	2022.25	2429.05	2498.46	2405.22	2553.64	2556.95	2527	2377.15	2691.48	2678.09	2647.89	2230.71	2371.4	2227.55	2300.49	2327.73	2284.92	2295.61	2286.76	2245.96	2303.18
CD28		NM_001243078.1	NM_001243078.1:2065	Endogenous	mRNA	100	7.9	10.18	16.33	2.14	17.77	16.14	11.27	6.01	13.37	11.75	10.97	11.35	6.2	7.77	12.67	5.89	9.94	16.58	10.73	16.39	9.79	13.2	13.17	8.68
CD34		NM_001025109.1	NM_001025109.1:1580	Endogenous	mRNA	100	1.97	2.91	6.12	2.14	3.55	5.38	7.52	2	4.22	5.88	5.49	8.01	8.27	5.44	3.52	5.89	6.39	3.98	1.79	8.2	4.45	3.47	5.54	6.01
CD36		NM_001001548.2	NM_001001548.2:705	Endogenous	mRNA	100	9.87	7.27	14.29	12.83	7.11	21.52	15.03	18.04	6.33	11.75	13.03	9.35	12.4	11.65	8.45	11.78	4.97	12.6	16.09	5.46	18.69	10.42	13.17	12.01
CD3D		NM_000732.4	NM_000732.4:110	Endogenous	mRNA	100	1.97	5.82	8.16	2.14	3.55	7.17	3.76	4.01	4.93	5.88	10.97	4.01	2.07	7.77	6.34	11.78	11.36	5.31	1.79	7.51	4.45	6.25	9.7	6.01
CD3E		NM_000733.2	NM_000733.2:75	Endogenous	mRNA	100	5.92	16	12.25	2.14	10.66	5.38	11.27	16.04	20.41	25.47	18.52	18.7	16.53	20.19	22.53	8.83	17.04	24.54	16.09	28.01	30.25	21.54	23.56	21.36
CD3EAP		NM_012099.1	NM_012099.1:555	Endogenous	mRNA	100	1040.64	981.89	973.66	951.27	1012.84	921.9	958.33	877.94	955.78	987.29	882	927.43	1115.87	925.6	760.23	771.33	704.18	802.42	820.61	698.8	809.69	810.89	819.1	802.21
CD4		NM_000616.4	NM_000616.4:975	Endogenous	mRNA	100	5.92	7.27	6.12	6.41	3.55	3.59	1.88	6.01	7.04	3.92	8.92	3.34	10.33	6.99	4.93	8.83	6.39	6.63	7.15	6.83	9.79	7.64	4.85	9.34
CD40		NM_001250.4	NM_001250.4:1265	Endogenous	mRNA	100	120.45	110.55	138.8	117.57	191.91	184.74	206.7	240.53	108.39	113.62	135.8	134.87	119.85	111.82	125.3	110.4	126.36	127.33	96.54	105.88	74.74	87.55	88.7	86.09
CD40LG		NM_000074.2	NM_000074.2:1225	Endogenous	mRNA	100	7.9	8.73	10.21	2.14	8.88	8.97	16.91	24.05	12.67	13.71	7.54	10.68	12.4	14.75	13.37	13.25	11.36	23.21	12.51	16.39	15.13	13.9	12.47	16.02
CD44		NM_001001392.1	NM_001001392.1:429	Endogenous	mRNA	100	7.9	11.64	2.04	8.55	37.32	48.43	43.22	62.14	19.71	17.63	20.58	16.69	26.86	20.97	16.89	19.14	13.49	21.88	28.61	18.44	18.69	10.42	18.02	20.02
CD45R0		NM_080921.3	NM_080921.3:258	Endogenous	mRNA	100	3.95	7.27	4.08	10.69	5.33	3.59	11.27	8.02	7.74	3.92	10.97	8.68	4.13	9.32	13.37	7.36	14.2	11.94	5.36	7.51	13.35	11.12	13.17	12.01
CD45RA		NM_002838.4	NM_002838.4:258	Endogenous	mRNA	100	7.9	2.91	4.08	6.41	1.78	5.38	3.76	4.01	2.82	3.92	4.8	2.67	10.33	1.55	4.22	7.36	5.68	4.64	1.79	3.42	5.34	2.78	4.85	2.67
CD45RB		ENST00000367367.1	ENST00000367367.1:131	Endogenous	mRNA	100	5.92	8.73	8.16	14.96	5.33	5.38	5.64	10.02	9.15	13.71	14.4	6.01	6.2	10.09	6.34	8.83	8.52	13.26	7.15	11.61	11.57	14.59	9.7	6.01
CD46		NM_172350.1	NM_172350.1:365	Endogenous	mRNA	100	2073.38	2259.08	2186.15	2135.55	1730.72	1901.2	1796.4	1920.24	2740.64	2362.46	2903.88	2790.97	2155.28	2637.8	2943.77	2527.44	3136.17	3039.91	2442.15	3139.46	2992.3	3111.55	3076.84	3168.12
CD48		NM_001778.2	NM_001778.2:270	Endogenous	mRNA	100	3.95	5.82	10.21	8.55	7.11	3.59	3.76	8.02	13.37	1.96	8.92	4.67	4.13	10.09	9.85	5.89	9.94	6.63	12.51	12.98	12.46	9.03	12.47	7.34
CD5		NM_014207.2	NM_014207.2:1295	Endogenous	mRNA	100	5.92	2.91	8.16	4.28	10.66	7.17	7.52	2	4.93	7.84	7.54	5.34	8.27	6.21	7.04	4.42	7.81	6.63	7.15	8.2	6.23	4.86	8.32	6.01
CD53		NM_001040033.1	NM_001040033.1:835	Endogenous	mRNA	100	1.97	2.91	8.16	4.28	7.11	5.38	5.64	8.02	7.04	3.92	5.49	7.34	6.2	4.66	6.34	8.83	3.55	7.29	5.36	6.83	8.01	5.56	10.39	6.67
CD55		NM_000574.3	NM_000574.3:101	Endogenous	mRNA	100	73.06	87.28	81.65	66.27	62.19	66.36	46.98	68.15	83.05	90.11	90.53	76.12	59.93	83.09	57.72	88.32	95.83	86.87	91.18	76.51	90.76	95.89	85.24	74.75
CD58		NM_001779.2	NM_001779.2:478	Endogenous	mRNA	100	568.7	673.5	630.74	622.07	604.15	590.09	620.09	681.51	518.71	577.88	564.45	501.44	708.78	597.13	523.71	590.27	604.8	543.79	668.64	594.97	554.33	567	555.77	577.96
CD59		NM_000611.4	NM_000611.4:730	Endogenous	mRNA	100	2138.54	2024.88	2049.38	2150.51	2366.86	2582.76	2320.66	2561.66	2057.24	2184.19	2121.33	2117.93	2242.07	2301.57	2399.64	2676.11	2532.79	2533.92	2506.52	2518.54	2428.19	2520.23	2399.8	2512.07
CD6		NM_006725.3	NM_006725.3:1280	Endogenous	mRNA	100	1.97	10.18	6.12	8.55	17.77	10.76	9.4	4.01	9.15	13.71	9.6	11.35	6.2	2.33	8.45	7.36	4.26	9.28	8.94	11.61	12.46	9.03	11.09	11.35
CD7		NM_006137.6	NM_006137.6:440	Endogenous	mRNA	100	11.85	14.55	2.04	4.28	8.88	5.38	5.64	2	8.45	5.88	6.17	8.01	4.13	15.53	4.22	11.78	9.23	9.28	12.51	12.3	10.68	12.51	9.01	14.68
CD70		NM_001252.2	NM_001252.2:190	Endogenous	mRNA	100	19.75	20.37	14.29	19.24	8.88	25.11	9.4	14.03	7.04	21.55	22.63	16.02	26.86	16.31	14.78	16.19	10.65	9.95	16.09	9.56	10.68	13.9	18.02	20.69
CD74		NM_001025159.1	NM_001025159.1:964	Endogenous	mRNA	100	5.92	11.64	8.16	10.69	14.22	8.97	11.27	10.02	7.04	9.79	7.54	14.02	16.53	14.75	11.97	10.3	7.81	23.21	3.58	13.66	23.13	14.59	11.09	10.68
CD79A		NM_001783.3	NM_001783.3:695	Endogenous	mRNA	100	9.87	11.64	16.33	12.83	5.33	8.97	15.03	26.06	11.26	1.96	14.4	13.35	10.33	10.87	8.45	10.3	9.23	13.26	3.58	14.34	16.91	9.73	8.32	12.01
CD79B		NM_021602.2	NM_021602.2:24	Endogenous	mRNA	100	7.9	5.82	12.25	6.41	5.33	7.17	15.03	18.04	11.26	9.79	10.97	6.68	10.33	5.44	7.74	10.3	9.23	7.29	10.73	8.88	23.13	10.42	16.63	7.34
CD80		NM_005191.3	NM_005191.3:1288	Endogenous	mRNA	100	15.8	20.37	4.08	12.83	23.1	12.56	15.03	14.03	23.93	11.75	18.52	20.7	12.4	27.18	23.93	13.25	15.62	21.22	17.88	20.49	24.02	18.07	21.48	13.35
CD81		NM_004356.3	NM_004356.3:735	Endogenous	mRNA	100	9780.41	10677.1	10244.9	10297.2	12120.4	12350.6	11905.8	11932.4	11646.7	11716.3	11572.3	12243.5	11462.5	11354.9	10889.6	11521.4	11093	11101.9	11492.1	10503.8	10965.5	10957.8	11536.8	11142.8
CD82		NM_002231.3	NM_002231.3:1211	Endogenous	mRNA	100	21.72	18.91	24.49	36.34	33.76	39.46	26.31	36.08	24.63	21.55	17.83	20.03	22.73	20.97	18.3	27.97	17.75	19.89	32.18	23.22	21.35	24.32	21.48	24.03
CD83		NM_004233.3	NM_004233.3:1960	Endogenous	mRNA	100	175.74	145.47	138.8	143.22	138.6	157.84	155.96	150.33	206.92	207.65	227.02	202.31	157.05	205.77	245.67	203.14	256.26	251.34	202.02	239.08	193.97	236.25	211.36	224.24
CD86		NM_175862.3	NM_175862.3:1265	Endogenous	mRNA	100	3.95	2.91	10.21	8.55	5.33	10.76	7.52	14.03	10.56	7.84	14.4	10.02	10.33	12.42	6.34	4.42	9.94	8.62	7.15	9.56	12.46	13.2	6.93	14.02
CD8A		NM_001768.5	NM_001768.5:1320	Endogenous	mRNA	100	5.92	11.64	10.21	8.55	8.88	12.56	11.27	12.03	4.22	7.84	13.03	9.35	14.46	12.42	14.78	7.36	10.65	5.31	5.36	12.98	9.79	11.81	12.47	10.01
CD8B		NM_004931.3	NM_004931.3:440	Endogenous	mRNA	100	3.95	7.27	2.04	4.28	3.55	3.59	15.03	8.02	9.15	3.92	6.86	7.34	2.07	3.88	7.74	5.89	7.81	8.62	3.58	8.2	8.01	9.73	6.24	7.34
CD9		NM_001769.2	NM_001769.2:405	Endogenous	mRNA	100	539.08	622.59	579.71	639.17	776.51	846.57	777.94	731.62	346.98	444.67	338.81	338.52	452.55	326.13	561.02	683.01	550.14	509.97	693.67	550.57	551.66	526.7	526.67	542.59
CD96		NM_005816.4	NM_005816.4:1355	Endogenous	mRNA	100	7.9	2.91	14.29	4.28	3.55	1.79	15.03	10.02	11.96	5.88	6.86	13.35	2.07	9.32	8.45	14.72	8.52	10.61	12.51	13.66	14.24	17.37	6.93	13.35
CD97		NM_078481.2	NM_078481.2:1370	Endogenous	mRNA	100	55.29	81.46	69.4	134.67	156.37	172.18	144.69	168.37	59.12	60.73	87.1	96.15	92.99	88.52	91.51	107.46	116.42	100.8	118	112.03	114.78	122.99	137.21	132.81
CD99		NM_002414.3	NM_002414.3:625	Endogenous	mRNA	100	7685.32	7254.35	7405.54	7210.42	7898.41	7981.44	7909.02	8272.28	7863.68	8190.24	7665.03	7474.19	7873.08	7362.85	7917.63	8487.59	7985.25	7794.09	8468.88	7972.29	8404.78	8420.21	8085.02	8082.82
CDH5		NM_001795.3	NM_001795.3:3405	Endogenous	mRNA	100	3.95	8.73	12.25	6.41	14.22	7.17	7.52	6.01	9.85	7.84	5.49	6.01	12.4	6.21	5.63	10.3	7.1	7.29	7.15	10.25	13.35	9.73	5.54	10.01
CDKN1A		NM_000389.2	NM_000389.2:1975	Endogenous	mRNA	100	136.25	152.74	142.89	104.75	197.24	331.81	249.92	352.78	583.46	554.37	926.58	695.74	615.79	1028.1	455.43	332.67	582.8	478.8	321.81	581.31	433.32	796.99	458.06	746.15
CEACAM1		NM_001712.3	NM_001712.3:2455	Endogenous	mRNA	100	9.87	14.55	6.12	6.41	5.33	1.79	9.4	2	9.15	7.84	6.86	8.68	8.27	7.77	6.34	7.36	1.42	12.6	12.51	7.51	12.46	9.03	3.46	6.67
CEACAM6		NM_002483.4	NM_002483.4:1217	Endogenous	mRNA	100	1.97	13.09	6.12	6.41	3.55	1.79	13.15	4.01	8.45	7.84	8.23	8.68	12.4	8.54	9.15	14.72	9.23	8.62	7.15	16.39	11.57	12.51	13.17	11.35
CEACAM8		NM_001816.3	NM_001816.3:825	Endogenous	mRNA	100	9.87	2.91	2.04	6.41	3.55	7.17	1.88	16.04	8.45	7.84	9.6	11.35	10.33	11.65	8.45	5.89	10.65	12.6	3.58	8.88	11.57	6.25	9.01	10.68
CEBPB		NM_005194.2	NM_005194.2:1420	Endogenous	mRNA	100	454.17	416.03	442.94	399.75	437.12	383.83	394.61	457.01	522.93	346.73	494.5	563.54	502.14	572.29	496.26	337.09	484.84	497.37	341.47	481.58	604.15	563.52	654.18	610
CFB		NM_001710.5	NM_001710.5:2029	Endogenous	mRNA	100	19.75	18.91	22.45	19.24	17.77	23.32	13.15	28.06	15.48	21.55	13.72	22.03	26.86	23.3	6.34	20.61	11.36	14.59	23.24	13.66	18.69	13.2	11.78	10.68
CFD		NM_001928.2	NM_001928.2:859	Endogenous	mRNA	100	197.46	177.47	177.59	192.39	85.29	73.54	84.56	90.2	156.95	195.89	174.89	148.23	173.58	128.9	142.19	150.14	166.11	173.08	185.93	176.92	219.77	223.74	204.43	224.91
CFH		NM_001014975.2	NM_001014975.2:702	Endogenous	mRNA	100	5.92	8.73	6.12	2.14	8.88	14.35	18.79	6.01	16.89	13.71	7.54	80.79	76.46	74.54	9.85	10.3	8.52	25.2	7.15	15.03	20.46	12.51	21.48	12.68
CFI		NM_000204.3	NM_000204.3:1780	Endogenous	mRNA	100	17.77	24.73	18.37	14.96	28.43	39.46	39.46	32.07	23.93	25.47	21.26	54.08	57.86	48.14	26.04	20.61	29.81	35.15	28.61	36.89	30.25	45.86	31.18	39.38
CFP		NM_002621.2	NM_002621.2:380	Endogenous	mRNA	100	5.92	14.55	8.16	10.69	5.33	7.17	1.88	10.02	14.08	7.84	6.17	12.69	6.2	5.44	16.89	8.83	11.36	11.94	8.94	16.39	16.91	11.12	18.71	13.35
CHUK		NM_001278.3	NM_001278.3:860	Endogenous	mRNA	100	2272.82	2221.26	2292.29	2496.82	2123.42	2007.02	2036.92	1934.27	2147.33	2150.89	2034.91	2153.99	2302	2221.59	2215.92	2021.06	2239.62	2230.86	2265.16	2198.85	2151.47	2043.56	2063.01	2171.04
CIITA		NM_000246.3	NM_000246.3:470	Endogenous	mRNA	87.5	1.97	4.36	2.04	2.14	1.78	1.79	1.88	2	2.11	1.96	1.37	4.01	2.07	1.55	1	1.47	1	1.99	1.79	2.05	2.67	1	2.08	3.34
CISH		NM_145071.2	NM_145071.2:558	Endogenous	mRNA	100	19.75	27.64	16.33	29.93	23.1	28.7	18.79	22.05	30.97	29.38	24	52.08	68.19	52.03	19.01	32.38	33.36	29.18	30.39	28.01	28.47	28.49	22.87	32.03
CLEC4A		NM_194448.2	NM_194448.2:388	Endogenous	mRNA	100	33.57	34.91	34.7	29.93	31.98	41.25	45.1	30.07	28.15	43.1	42.52	35.39	64.06	39.6	28.16	26.5	28.39	21.22	30.39	25.27	30.25	35.44	25.64	26.03
CLEC4E		NM_014358.2	NM_014358.2:570	Endogenous	mRNA	100	9.87	8.73	12.25	6.41	7.11	8.97	11.27	8.02	8.45	13.71	6.86	4.67	6.2	7.77	3.52	7.36	9.94	9.95	7.15	6.83	12.46	9.03	9.7	9.34
CLEC5A		NM_013252.2	NM_013252.2:615	Endogenous	mRNA	100	3.95	7.27	4.08	2.14	8.88	5.38	1.88	10.02	7.04	1.96	2.06	7.34	18.6	6.21	7.74	4.42	4.26	9.28	7.15	7.51	5.34	3.47	4.85	5.34
CLEC6A		NM_001007033.1	NM_001007033.1:342	Endogenous	mRNA	100	7.9	8.73	2.04	2.14	7.11	5.38	5.64	8.02	9.15	3.92	6.86	8.68	6.2	7.77	10.56	7.36	9.23	10.61	16.09	5.46	15.13	4.17	11.78	10.68
CLEC7A		NM_197954.2	NM_197954.2:55	Endogenous	mRNA	100	1.97	2.91	2.04	2.14	1.78	1.79	5.64	2	5.63	5.88	10.97	6.01	2.07	3.88	6.34	1.47	7.81	7.96	1.79	15.03	10.68	9.03	10.39	8.01
CLU		NM_001831.2	NM_001831.2:2340	Endogenous	mRNA	100	3.95	8.73	6.12	8.55	5.33	3.59	3.76	10.02	7.04	15.67	9.6	4.67	10.33	4.66	11.97	4.42	13.49	9.28	5.36	13.66	8.9	13.2	11.09	12.01
CMKLR1		NM_004072.1	NM_004072.1:770	Endogenous	mRNA	100	3.95	4.36	4.08	4.28	1.78	7.17	1.88	14.03	11.26	1.96	6.86	7.34	4.13	10.87	14.08	10.3	7.1	14.59	10.73	9.56	8.9	12.51	9.01	9.34
CR1		NM_000651.4	NM_000651.4:1695	Endogenous	mRNA	100	5.92	1.45	2.04	6.41	3.55	7.17	5.64	2	1.41	7.84	3.43	6.01	2.07	6.99	9.15	4.42	5.68	5.31	3.58	6.83	8.9	7.64	9.7	4.67
CR2		NM_001006658.1	NM_001006658.1:485	Endogenous	mRNA	100	47.39	66.91	38.78	64.13	71.08	44.84	58.25	50.11	37.3	52.89	50.07	42.06	53.73	51.25	47.87	52.99	58.92	55.71	66.15	60.11	56.95	52.11	43.66	60.07
CRADD		NM_003805.3	NM_003805.3:675	Endogenous	mRNA	100	201.41	194.92	198	183.84	177.69	166.8	178.51	180.4	206.92	258.58	209.18	198.97	208.71	208.1	202.02	231.11	245.61	201.6	203.81	192.63	209.99	200.81	185.03	201.55
CSF1		NM_000757.4	NM_000757.4:823	Endogenous	mRNA	100	47.39	69.82	44.91	36.34	78.18	89.68	97.71	100.22	66.86	94.03	66.53	419.31	386.42	345.55	62.65	75.07	58.92	207.57	80.45	79.92	75.63	88.25	103.95	132.81
CSF1R		NM_005211.2	NM_005211.2:3775	Endogenous	mRNA	100	3.95	1.45	10.21	12.83	5.33	10.76	7.52	10.02	9.15	9.79	6.17	6.68	2.07	6.21	7.04	7.36	4.97	7.96	5.36	8.88	6.23	9.03	9.7	5.34
CSF2		NM_000758.2	NM_000758.2:475	Endogenous	mRNA	100	9.87	2.91	6.12	4.28	8.88	3.59	3.76	10.02	7.04	7.84	6.86	4.67	12.4	7.77	11.26	5.89	4.26	12.6	8.94	6.83	11.57	6.25	9.01	8.68
CSF2RB		NM_000395.2	NM_000395.2:3300	Endogenous	mRNA	100	1.97	10.18	2.04	4.28	5.33	3.59	1.88	4.01	14.78	3.92	4.12	8.01	6.2	10.09	9.15	5.89	8.52	8.62	3.58	10.25	16.91	10.42	13.17	8.01
CSF3R		NM_156038.2	NM_156038.2:90	Endogenous	mRNA	100	3.95	4.36	2.04	2.14	10.66	1.79	3.76	2	3.52	3.92	3.43	4.01	4.13	3.88	7.74	5.89	3.55	4.64	3.58	2.73	3.56	2.08	2.77	2.67
CTLA4-TM		NM_005214.3	NM_005214.3:554	Endogenous	mRNA	100	7.9	4.36	4.08	4.28	1.78	3.59	3.76	4.01	7.04	1.96	6.86	11.35	4.13	10.09	8.45	2.94	7.1	9.28	5.36	11.61	9.79	9.73	9.7	4.67
CTLA4_all		NM_005214.3	NM_005214.3:405	Endogenous	mRNA	100	3.95	7.27	12.25	6.41	7.11	1.79	13.15	4.01	10.56	3.92	3.43	8.68	6.2	2.33	4.93	8.83	7.1	7.96	1.79	5.46	6.23	3.47	9.01	6.67
CTNNB1		NM_001098210.1	NM_001098210.1:1815	Endogenous	mRNA	100	18502.4	18430.5	18215.8	18860.8	15247.8	15984.4	16488.9	16424.3	23217.3	19667.5	22985.5	22104.1	18690.8	21588.5	24829.2	20712.6	24970.1	25312.7	20225.5	25705.2	25050.6	25332.9	24830.2	25074
CTSC		NM_001814.4	NM_001814.4:260	Endogenous	mRNA	100	1455.31	1479.38	1463.55	1545.55	2079	1845.59	1950.48	1810	1336.54	1337.94	1242.76	1492.3	1512.62	1358.11	1246.63	1414.6	1223.09	1265.3	1408.8	1179.69	1391.6	1326.47	1408.83	1336.12
CTSG		NM_001911.2	NM_001911.2:160	Endogenous	mRNA	100	15.8	5.82	4.08	10.69	3.55	8.97	9.4	14.03	6.33	15.67	12.35	6.01	8.27	10.09	9.85	5.89	8.52	11.27	14.3	11.61	16.02	13.2	10.39	11.35
CTSS		NM_004079.3	NM_004079.3:685	Endogenous	mRNA	100	21.72	11.64	12.25	14.96	14.22	14.35	11.27	8.02	14.78	15.67	13.03	27.38	24.8	23.3	10.56	7.36	16.33	12.6	23.24	10.25	18.69	20.85	16.63	18.69
CUL9		NM_015089.2	NM_015089.2:2675	Endogenous	mRNA	100	106.63	103.28	104.1	89.78	122.61	95.06	86.44	90.2	109.79	129.29	135.8	132.87	159.11	124.24	129.52	141.31	122.81	131.31	132.3	137.3	163.72	151.48	157.31	154.17
CX3CL1		NM_002996.3	NM_002996.3:140	Endogenous	mRNA	100	5.92	16	6.12	6.41	15.99	7.17	5.64	14.03	2.82	3.92	8.23	8.01	18.6	7.77	5.63	5.89	5.68	7.96	7.15	12.98	5.34	10.42	4.85	6.01
CX3CR1		NM_001337.3	NM_001337.3:1040	Endogenous	mRNA	100	9.87	7.27	12.25	12.83	19.55	1.79	9.4	10.02	18.3	13.71	16.46	15.36	22.73	16.31	14.78	5.89	14.91	14.59	12.51	16.39	21.35	17.37	15.25	12.01
CXCL1		NM_001511.1	NM_001511.1:742	Endogenous	mRNA	100	25.67	17.46	26.54	34.2	30.21	28.7	28.19	56.12	23.23	23.51	17.83	16.69	45.46	17.08	19.71	25.02	19.17	22.55	42.91	23.91	41.82	27.1	18.71	20.02
CXCL10		NM_001565.1	NM_001565.1:40	Endogenous	mRNA	100	11.85	5.82	4.08	2.14	3.55	5.38	1.88	8.02	7.74	7.84	6.86	496.77	208.71	237.61	4.93	4.42	9.23	14.59	14.3	8.88	7.12	6.95	9.01	6.67
CXCL11		NM_005409.4	NM_005409.4:282	Endogenous	mRNA	100	1.97	7.27	2.04	2.14	1.78	7.17	7.52	6.01	10.56	1.96	5.49	61.43	35.13	42.71	7.74	5.89	6.39	9.95	7.15	9.56	5.34	9.03	9.01	5.34
CXCL12		NM_000609.5	NM_000609.5:210	Endogenous	mRNA	100	82.94	74.19	100.02	100.47	163.48	240.34	195.42	240.53	63.34	45.06	60.35	49.41	76.46	67.56	186.54	197.25	264.07	224.81	235.99	235.66	12.46	13.9	11.78	7.34
CXCL13		NM_006419.2	NM_006419.2:210	Endogenous	mRNA	100	5.92	10.18	4.08	2.14	1.78	1.79	1.88	6.01	5.63	3.92	9.6	2.67	2.07	7.77	10.56	4.42	9.23	3.32	3.58	7.51	8.01	9.03	6.93	6.01
CXCL2		NM_002089.3	NM_002089.3:854	Endogenous	mRNA	100	27.65	30.55	38.78	34.2	35.54	48.43	41.34	22.05	25.34	39.18	20.58	34.05	41.33	23.3	14.08	13.25	30.52	24.54	41.12	25.96	27.58	25.71	22.87	23.36
CXCL9		NM_002416.1	NM_002416.1:1975	Endogenous	mRNA	100	9.87	8.73	14.29	8.55	8.88	12.56	13.15	14.03	16.19	19.59	9.6	10.02	18.6	10.87	8.45	11.78	10.65	11.94	25.03	16.39	16.91	11.81	13.86	14.68
CXCR1		NM_000634.2	NM_000634.2:1950	Endogenous	mRNA	100	9.87	4.36	6.12	4.28	5.33	10.76	9.4	6.01	7.74	11.75	7.54	6.68	6.2	6.21	6.34	4.42	7.81	13.93	3.58	8.2	10.68	5.56	13.86	7.34
CXCR2		NM_001557.2	NM_001557.2:2055	Endogenous	mRNA	100	9.87	7.27	6.12	6.41	8.88	10.76	7.52	14.03	9.15	17.63	15.77	13.35	12.4	13.98	9.85	7.36	12.07	11.94	8.94	13.66	16.91	13.2	9.01	15.35
CXCR3		NM_001504.1	NM_001504.1:80	Endogenous	mRNA	100	7.9	7.27	4.08	4.28	12.44	7.17	7.52	4.01	10.56	3.92	4.12	4.67	8.27	3.88	7.74	1.47	3.55	6.63	7.15	7.51	6.23	6.25	3.46	6.67
CXCR4		NM_003467.2	NM_003467.2:1335	Endogenous	mRNA	100	252.75	219.65	210.25	243.7	463.78	414.32	396.48	396.88	275.89	213.52	275.02	290.45	281.03	325.36	247.78	247.3	262.65	234.09	205.6	239.76	337.22	279.33	297.29	282.98
CXCR6		NM_006564.1	NM_006564.1:95	Endogenous	mRNA	100	3.95	5.82	4.08	2.14	7.11	5.38	1.88	2	3.52	5.88	4.12	10.68	4.13	6.21	8.45	2.94	7.81	5.97	3.58	5.46	9.79	11.81	9.7	10.01
CYBB		NM_000397.3	NM_000397.3:2686	Endogenous	mRNA	100	5.92	4.36	8.16	8.55	14.22	12.56	3.76	14.03	11.96	11.75	12.35	20.03	14.46	14.75	13.37	4.42	15.62	14.59	10.73	12.3	20.46	9.73	12.47	12.01
DEFB1		NM_005218.3	NM_005218.3:40	Endogenous	mRNA	100	13.82	11.64	6.12	6.41	5.33	5.38	18.79	6.01	9.15	9.79	4.8	9.35	8.27	6.99	10.56	10.3	7.1	7.29	10.73	10.25	14.24	11.12	5.54	9.34
DEFB103A		NM_001081551.2	NM_001081551.2:106	Endogenous	mRNA	100	3.95	2.91	6.12	6.41	7.11	7.17	5.64	4.01	9.85	1.96	9.6	10.68	2.07	6.21	8.45	1.47	7.81	9.28	3.58	4.78	11.57	8.34	7.62	6.67
DEFB103B		NM_018661.3	NM_018661.3:114	Endogenous	mRNA	100	3.95	7.27	6.12	4.28	5.33	5.38	7.52	10.02	11.26	3.92	8.92	12.02	10.33	11.65	7.74	13.25	7.81	6.63	12.51	10.25	12.46	9.73	6.93	10.68
DEFB4A		NM_004942.2	NM_004942.2:97	Endogenous	mRNA	100	9.87	5.82	12.25	4.28	3.55	7.17	11.27	16.04	10.56	11.75	5.49	8.68	6.2	6.99	7.04	11.78	7.1	11.94	12.51	10.25	14.24	8.34	9.7	10.68
DPP4		NM_001935.3	NM_001935.3:2700	Endogenous	mRNA	100	19.75	26.18	12.25	12.83	26.65	21.52	37.58	40.09	8.45	11.75	11.66	8.01	18.6	17.08	14.78	23.55	16.33	15.92	25.03	14.34	20.46	24.32	23.56	23.36
DUSP4		NM_057158.2	NM_057158.2:3115	Endogenous	mRNA	100	35.54	24.73	28.58	29.93	60.42	50.22	67.65	78.17	64.05	88.15	61.04	70.11	59.93	57.46	37.31	30.91	57.5	41.12	53.63	47.13	38.26	41.69	45.74	49.39
EBI3		NM_005755.2	NM_005755.2:485	Endogenous	mRNA	100	3.95	8.73	4.08	10.69	7.11	7.17	9.4	8.02	4.93	5.88	4.8	6.01	10.33	4.66	3.52	13.25	7.1	5.31	7.15	3.42	8.9	6.95	4.85	4
EDNRB		NM_003991.2	NM_003991.2:560	Endogenous	mRNA	100	31.59	20.37	32.66	55.58	115.5	139.9	131.54	160.35	45.04	58.77	54.18	62.76	59.93	57.46	85.88	110.4	68.86	82.89	107.27	81.97	46.27	41.69	37.42	38.04
EGR1		NM_001964.2	NM_001964.2:1505	Endogenous	mRNA	100	23.7	13.09	10.21	21.38	24.88	19.73	20.67	24.05	17.6	27.42	17.15	20.03	26.86	20.97	14.78	16.19	18.46	21.22	21.45	19.13	33.81	15.98	13.86	22.69
EGR2		NM_000399.3	NM_000399.3:1891	Endogenous	mRNA	100	11.85	14.55	16.33	8.55	17.77	21.52	22.55	6.01	16.89	1.96	14.4	16.02	10.33	14.75	15.49	13.25	16.33	15.25	1.79	17.76	15.13	11.12	13.86	10.68
ENTPD1		NM_001098175.1	NM_001098175.1:8830	Endogenous	mRNA	100	3.95	2.91	6.12	4.28	1.78	10.76	1.88	2	8.45	1.96	3.43	5.34	6.2	9.32	7.04	4.42	7.1	4.64	5.36	8.88	8.01	3.47	4.85	4
EOMES		NM_005442.2	NM_005442.2:1670	Endogenous	mRNA	100	31.59	20.37	28.58	29.93	23.1	34.08	28.19	14.03	15.48	35.26	21.95	29.38	26.86	27.95	19.01	35.33	24.85	24.54	35.76	24.59	24.91	18.76	23.56	26.03
ETS1		NM_005238.3	NM_005238.3:4625	Endogenous	mRNA	100	31.59	14.55	10.21	23.51	122.61	156.04	118.38	132.29	101.35	103.82	115.22	101.49	90.92	112.59	28.16	22.08	29.81	30.51	23.24	24.59	70.29	91.03	75.54	71.41
FADD		NM_003824.2	NM_003824.2:1560	Endogenous	mRNA	100	80.96	84.37	114.31	96.2	117.28	105.82	108.99	96.21	93.61	99.9	85.05	104.16	90.92	75.32	100.66	113.34	110.74	114.73	114.42	108.61	102.32	89.64	117.11	115.46
FAS		NM_000043.3	NM_000043.3:90	Endogenous	mRNA	100	15.8	17.46	16.33	23.51	30.21	32.28	13.15	34.08	22.52	48.97	52.12	60.76	74.39	62.12	22.53	25.02	36.2	29.18	25.03	36.2	30.25	36.83	27.03	36.71
FCAR		NM_133280.1	NM_133280.1:75	Endogenous	mRNA	100	1.97	1.45	10.21	2.14	1.78	5.38	13.15	12.03	9.15	7.84	4.8	8.68	2.07	10.87	3.52	8.83	4.26	7.96	3.58	4.78	8.9	5.56	8.32	2
FCER1A		NM_002001.2	NM_002001.2:114	Endogenous	mRNA	100	9.87	8.73	6.12	4.28	15.99	7.17	7.52	4.01	9.15	7.84	9.6	8.01	8.27	8.54	8.45	7.36	3.55	7.29	3.58	9.56	9.79	9.73	7.62	5.34
FCER1G		NM_004106.1	NM_004106.1:36	Endogenous	mRNA	100	5.92	5.82	6.12	2.14	10.66	7.17	15.03	8.02	11.96	9.79	5.49	12.69	4.13	13.2	11.97	8.83	8.52	12.6	5.36	9.56	14.24	13.9	6.93	10.01
FCGR1A/B		NM_000566.3	NM_000566.3:1545	Endogenous	mRNA	100	9.87	7.27	6.12	2.14	7.11	1.79	3.76	2	13.37	7.84	7.54	7.34	10.33	5.44	7.04	2.94	4.97	7.29	8.94	8.88	10.68	9.73	5.54	10.68
FCGR2A		NM_021642.3	NM_021642.3:60	Endogenous	mRNA	100	1.97	8.73	6.12	4.28	7.11	3.59	5.64	4.01	6.33	7.84	6.86	8.01	6.2	6.99	5.63	8.83	9.23	9.95	12.51	6.15	8.9	9.73	6.24	6.01
FCGR2A/C		NM_201563.4	NM_201563.4:1166	Endogenous	mRNA	100	7.9	8.73	10.21	6.41	12.44	3.59	3.76	12.03	9.15	7.84	17.83	32.72	26.86	24.07	12.67	19.14	13.49	21.22	17.88	14.34	12.46	20.85	13.17	20.02
FCGR2B		NM_001002273.1	NM_001002273.1:870	Endogenous	mRNA	100	3.95	5.82	4.08	6.41	1.78	5.38	3.76	10.02	4.22	5.88	5.49	6.01	6.2	5.44	4.22	8.83	5.68	5.31	8.94	10.93	8.01	6.95	9.01	5.34
FCGR3A/B		NM_000570.4	NM_000570.4:696	Endogenous	mRNA	100	3.95	10.18	6.12	8.55	3.55	8.97	13.15	2	6.33	9.79	6.86	10.02	12.4	10.87	9.85	1.47	4.97	9.28	8.94	12.98	10.68	9.73	13.17	11.35
FCGRT		NM_004107.4	NM_004107.4:1276	Endogenous	mRNA	100	578.57	590.59	569.5	579.31	584.61	609.82	516.75	633.4	537.71	677.79	662.53	546.84	636.46	699.63	659.57	803.72	792.92	747.38	759.82	758.91	773.21	910.95	758.82	836.91
FKBP5		NM_001145775.1	NM_001145775.1:540	Endogenous	mRNA	100	1684.37	1565.21	1714.62	1526.31	1615.22	1589.11	1484.47	1515.35	1478.71	1847.26	1571.28	1428.2	1719.27	1501.77	1473.29	1685.45	1490.71	1490.78	1664.46	1514.4	1477.02	1527.28	1453.88	1518.99
FN1		NM_212482.1	NM_212482.1:1776	Endogenous	mRNA	100	191.54	213.83	200.04	230.87	296.75	367.68	289.38	380.84	300.53	327.14	321.66	498.1	460.81	472.89	363.22	443.07	386.17	397.23	404.05	366.13	363.92	397.46	390.15	417.79
FOXP3		NM_014009.3	NM_014009.3:1230	Endogenous	mRNA	100	19.75	18.91	20.41	4.28	10.66	5.38	16.91	16.04	14.08	13.71	10.97	14.02	4.13	10.87	16.19	20.61	11.36	9.95	10.73	15.71	13.35	12.51	9.7	12.01
FYN		NM_002037.3	NM_002037.3:765	Endogenous	mRNA	100	1587.61	1587.03	1453.35	1605.4	1956.39	1825.87	1933.57	1926.26	1550.5	1388.87	1432.74	1384.13	1345.24	1386.07	1500.04	1423.43	1475.09	1529.24	1389.13	1534.89	1676.33	1598.16	1613.96	1625.77
GATA3		NM_001002295.1	NM_001002295.1:2835	Endogenous	mRNA	100	7.9	11.64	4.08	8.55	14.22	14.35	13.15	18.04	23.23	3.92	16.46	15.36	14.46	17.86	16.19	5.89	12.78	17.91	5.36	18.44	23.13	13.9	21.48	21.36
GBP1		NM_002053.1	NM_002053.1:2110	Endogenous	mRNA	100	21.72	26.18	22.45	29.93	10.66	19.73	13.15	14.03	28.86	15.67	28.12	1963.03	960.89	1313.85	27.45	27.97	23.43	203.59	25.03	36.2	31.14	17.37	40.89	48.72
GBP5		NM_052942.3	NM_052942.3:1955	Endogenous	mRNA	100	1.97	4.36	6.12	6.41	1.78	5.38	3.76	2	7.74	3.92	6.86	14.69	10.33	12.42	12.67	4.42	9.94	8.62	3.58	15.03	13.35	11.12	10.39	12.68
GFI1		NM_005263.2	NM_005263.2:2235	Endogenous	mRNA	100	167.84	168.74	153.09	158.19	238.11	224.2	223.61	212.47	171.73	162.59	172.15	180.28	161.18	166.95	174.57	126.59	160.43	166.45	164.48	161.21	135.25	163.29	142.75	140.15
GNLY		NM_006433.2	NM_006433.2:305	Endogenous	mRNA	100	1.97	4.36	6.12	2.14	3.55	3.59	13.15	4.01	7.04	7.84	6.17	8.01	6.2	6.99	7.04	8.83	7.1	9.28	12.51	4.78	13.35	6.25	3.46	5.34
GP1BB		NM_000407.4	NM_000407.4:146	Endogenous	mRNA	100	77.01	71.28	67.36	40.62	104.84	93.27	93.95	80.18	52.79	62.69	39.09	40.06	64.06	45.04	49.98	80.96	63.18	55.71	57.21	56.7	50.72	52.11	42.96	50.72
GPI		NM_000175.2	NM_000175.2:1695	Endogenous	mRNA	100	3738	3403.89	3510.9	3358.3	3527.19	3348.62	3401.12	3481.69	4937.24	3426.15	4510.13	5014.4	3519.12	4737.47	4485.34	3161.87	4367.79	4490.24	3377.18	4540.47	5051.23	5061.3	5109.36	4956.74
GPR183		NM_004951.3	NM_004951.3:405	Endogenous	mRNA	100	9.87	7.27	6.12	4.28	10.66	7.17	3.76	10.02	11.26	9.79	13.03	10.68	6.2	6.21	10.56	7.36	7.1	11.27	3.58	9.56	14.24	4.86	9.01	7.34
GZMA		NM_006144.2	NM_006144.2:155	Endogenous	mRNA	100	17.77	2.91	4.08	14.96	10.66	12.56	16.91	10.02	11.26	19.59	12.35	12.02	18.6	6.21	8.45	8.83	16.33	16.58	8.94	17.08	21.35	18.07	12.47	14.68
GZMB		NM_004131.3	NM_004131.3:540	Endogenous	mRNA	100	9.87	2.91	14.29	4.28	10.66	14.35	9.4	10.02	11.96	11.75	9.6	18.03	4.13	12.42	15.49	5.89	12.07	9.95	3.58	16.39	14.24	13.2	13.86	12.68
GZMK		NM_002104.2	NM_002104.2:700	Endogenous	mRNA	100	3.95	2.91	8.16	4.28	1.78	5.38	1.88	18.04	6.33	1.96	3.43	11.35	4.13	6.99	5.63	2.94	5.68	1.33	7.15	7.51	8.01	5.56	6.24	6.67
HAMP		NM_021175.2	NM_021175.2:99	Endogenous	mRNA	100	3.95	1.45	8.16	12.83	10.66	3.59	9.4	6.01	4.93	7.84	6.86	5.34	6.2	6.99	7.04	1.47	3.55	8.62	5.36	6.83	8.01	4.17	5.54	4.67
HAVCR2		NM_032782.3	NM_032782.3:955	Endogenous	mRNA	100	3.95	1.45	6.12	8.55	7.11	5.38	9.4	10.02	9.85	13.71	15.77	10.02	8.27	6.99	7.74	2.94	9.94	8.62	7.15	8.88	8.01	6.95	9.01	9.34
HFE		NM_139011.2	NM_139011.2:875	Endogenous	mRNA	100	11.85	11.64	6.12	4.28	8.88	1.79	13.15	14.03	7.74	5.88	7.54	8.68	6.2	8.54	7.04	8.83	6.39	7.96	7.15	10.25	8.9	12.51	9.01	10.01
HLA-A		NM_002116.5	NM_002116.5:1000	Endogenous	mRNA	100	991.27	877.16	930.8	899.97	1190.54	1286	1268.38	1348.98	714.37	834.5	689.28	1431.54	1810.19	1473.81	715.18	914.12	738.97	1013.97	1094.14	758.91	793.68	770.59	810.79	868.95
HLA-B		NM_005514.6	NM_005514.6:937	Endogenous	mRNA	100	1097.9	1012.44	1122.67	1047.47	1720.06	1827.66	1736.26	1733.83	774.19	1096.99	780.49	2594.67	3620.38	2917.34	782.05	1083.4	813.5	1362.12	1246.11	894.84	839.05	902.61	1011.75	1201.31
HLA-C		NM_002117.4	NM_002117.4:895	Endogenous	mRNA	100	1099.88	1042.99	1177.78	1100.91	1451.74	1381.06	1305.96	1469.25	1371.02	1075.45	1331.23	4601.76	3453	4879.57	1313.5	1062.79	1247.23	2555.14	1230.02	1491.18	1340	1420.97	1710.28	1920.76
HLA-DMA		NM_006120.3	NM_006120.3:380	Endogenous	mRNA	100	37.52	23.27	16.33	36.34	47.98	77.12	48.86	56.12	14.08	29.38	19.2	16.69	22.73	23.3	14.78	26.5	28.39	17.24	25.03	25.96	24.02	31.96	13.86	26.03
HLA-DMB		NM_002118.3	NM_002118.3:20	Endogenous	mRNA	100	154.02	152.74	144.93	211.63	218.56	254.69	217.97	286.63	133.72	133.21	139.23	129.53	142.58	163.07	171.05	172.22	178.89	183.03	168.05	187.17	168.17	203.59	168.39	202.22
HLA-DOB		NM_002120.3	NM_002120.3:230	Endogenous	mRNA	100	33.57	45.09	48.99	29.93	46.2	43.05	56.37	54.12	26.74	37.22	33.61	36.72	51.66	30.28	33.08	23.55	30.52	32.49	26.82	32.11	38.26	31.27	28.41	37.37
HLA-DPA1		NM_033554.2	NM_033554.2:857	Endogenous	mRNA	100	61.21	96.01	73.48	104.75	119.05	177.56	129.66	190.42	38.01	50.93	51.44	52.75	92.99	69.89	43.64	91.26	48.98	55.71	87.6	64.89	56.95	76.43	43.66	64.74
HLA-DPB1		NM_002121.4	NM_002121.4:931	Endogenous	mRNA	100	29.62	33.46	18.37	29.93	111.95	136.31	92.07	118.26	28.86	23.51	34.29	18.7	22.73	21.74	27.45	36.8	41.17	26.53	30.39	32.79	54.28	68.1	50.59	72.08
HLA-DQA1		NM_002122.3	NM_002122.3:261	Endogenous	mRNA	100	17.77	7.27	16.33	10.69	12.44	17.94	11.27	10.02	10.56	7.84	13.72	12.69	10.33	12.42	14.08	20.61	16.33	18.57	17.88	12.98	11.57	15.29	14.55	14.68
HLA-DQB1		NM_002123.3	NM_002123.3:384	Endogenous	mRNA	100	144.15	132.37	155.13	166.74	270.09	240.34	225.49	250.55	141.47	123.41	122.77	149.56	171.51	166.17	200.62	197.25	206.57	182.37	214.54	206.29	172.62	177.88	156.61	160.17
HLA-DRA		NM_019111.3	NM_019111.3:335	Endogenous	mRNA	100	5.92	1.45	2.04	10.69	10.66	26.9	3.76	16.04	8.45	7.84	4.8	8.68	6.2	6.21	7.04	11.78	7.81	8.62	1.79	10.93	10.68	11.81	9.01	13.35
HLA-DRB1		NM_002124.2	NM_002124.2:104	Endogenous	mRNA	100	51.34	56.73	55.11	40.62	74.63	104.03	88.32	120.27	23.93	64.64	45.95	41.4	41.33	48.92	46.46	97.15	74.54	48.41	94.75	56.7	49.83	53.5	42.27	66.74
HLA-DRB3		NM_022555.3	NM_022555.3:698	Endogenous	mRNA	100	41.47	34.91	32.66	51.3	81.74	116.58	62.01	90.2	37.3	37.22	52.81	43.4	45.46	56.69	45.05	64.77	70.99	56.37	60.79	71.72	56.95	75.04	58.9	68.07
HRAS		NM_005343.2	NM_005343.2:396	Endogenous	mRNA	100	515.38	574.59	673.6	560.07	689.45	751.51	650.16	639.41	736.89	638.61	794.21	757.17	632.33	812.23	754.6	678.59	802.14	778.55	670.43	713.14	678.01	725.43	707.53	689.42
ICAM1		NM_000201.2	NM_000201.2:2253	Endogenous	mRNA	100	5.92	7.27	4.08	8.55	3.55	3.59	13.15	10.02	9.85	1.96	8.23	32.72	20.66	17.86	12.67	8.83	12.07	19.23	8.94	10.25	12.46	6.25	15.94	14.02
ICAM2		NM_000873.3	NM_000873.3:415	Endogenous	mRNA	100	5.92	4.36	2.04	12.83	8.88	10.76	9.4	4.01	5.63	5.88	7.54	8.01	2.07	8.54	4.93	5.89	7.1	6.63	8.94	10.25	17.8	5.56	7.62	8.01
ICAM3		NM_002162.3	NM_002162.3:1225	Endogenous	mRNA	100	203.39	173.1	200.04	198.8	179.47	199.09	208.58	188.42	121.06	158.67	105.62	122.19	177.71	139.77	135.15	161.92	120.68	106.11	175.21	120.22	125.46	121.6	124.04	138.15
ICAM4		NM_001039132.1	NM_001039132.1:463	Endogenous	mRNA	100	17.77	23.27	24.49	38.48	26.65	19.73	15.03	26.06	16.19	29.38	12.35	12.69	18.6	14.75	14.08	20.61	12.78	11.94	23.24	12.3	16.91	36.83	28.41	16.02
ICAM5		NM_003259.3	NM_003259.3:327	Endogenous	mRNA	100	11.85	18.91	10.21	12.83	19.55	16.14	16.91	18.04	11.26	13.71	19.2	28.04	12.4	13.98	13.37	4.42	19.88	26.53	17.88	27.32	24.91	20.85	27.03	24.69
ICOS		NM_012092.2	NM_012092.2:640	Endogenous	mRNA	100	17.77	21.82	14.29	12.83	12.44	25.11	9.4	12.03	9.85	15.67	9.6	16.02	12.4	11.65	11.97	14.72	13.49	18.57	7.15	14.34	15.13	13.9	6.93	19.35
ICOSLG		NM_015259.4	NM_015259.4:1190	Endogenous	mRNA	100	181.67	176.01	193.92	181.7	181.25	148.87	146.57	178.39	150.62	141.04	175.58	135.54	144.65	149.09	142.19	136.9	141.97	144.57	189.51	150.28	193.97	218.88	168.39	202.89
IDO1		NM_002164.3	NM_002164.3:50	Endogenous	mRNA	100	5.92	2.91	4.08	4.28	3.55	3.59	5.64	12.03	5.63	1.96	6.86	67.44	49.59	38.83	10.56	2.94	9.94	9.28	10.73	5.46	7.12	8.34	7.62	12.68
IFI16		NM_005531.1	NM_005531.1:2255	Endogenous	mRNA	100	11.85	8.73	2.04	17.1	3.55	21.52	9.4	4.01	11.26	11.75	13.03	246.38	301.7	234.51	14.08	11.78	17.75	51.06	12.51	17.08	17.8	17.37	41.58	72.75
IFI35		NM_005533.3	NM_005533.3:415	Endogenous	mRNA	100	39.49	37.82	91.85	66.27	39.09	28.7	60.13	56.12	11.26	23.51	15.09	922.76	1225.39	756.32	14.78	38.27	15.62	358.77	107.27	63.53	14.24	13.9	64.45	87.43
IFIH1		NM_022168.2	NM_022168.2:185	Endogenous	mRNA	100	15.8	2.91	12.25	17.1	26.65	16.14	13.15	20.04	13.37	3.92	9.6	533.49	407.09	495.41	7.04	11.78	15.62	250.67	41.12	52.6	22.24	23.62	107.41	127.47
IFIT2		NM_001547.4	NM_001547.4:1995	Endogenous	mRNA	100	1.97	5.82	4.08	10.69	3.55	3.59	9.4	10.02	13.37	1.96	6.86	3274.38	2593.36	2336.51	9.85	5.89	7.1	395.9	35.76	33.47	9.79	11.12	40.89	37.37
IFITM1		NM_003641.3	NM_003641.3:482	Endogenous	mRNA	100	189.57	160.01	540.92	895.69	243.44	278.01	695.26	805.78	145.69	162.59	153.63	31817.1	38857.1	32642	130.93	173.7	146.94	13653.7	2515.46	1952.94	128.13	155.65	3499.56	4787.89
IFNA1/13		NM_024013.1	NM_024013.1:585	Endogenous	mRNA	100	9.87	5.82	4.08	8.55	3.55	3.59	5.64	8.02	9.85	5.88	9.6	9.35	4.13	13.98	7.74	4.42	8.52	8.62	1.79	16.39	17.8	7.64	10.39	10.01
IFNA2		NM_000605.3	NM_000605.3:611	Endogenous	mRNA	100	9.87	13.09	4.08	2.14	8.88	5.38	5.64	6.01	9.15	5.88	8.23	12.69	10.33	8.54	5.63	8.83	7.81	10.61	10.73	14.34	5.34	9.03	11.09	14.68
IFNAR1		NM_000629.2	NM_000629.2:3123	Endogenous	mRNA	100	254.73	242.93	224.53	230.87	248.77	233.17	195.42	224.5	175.95	233.11	165.29	179.61	270.7	159.96	172.46	284.1	183.14	186.35	262.81	173.5	188.63	201.51	158	200.22
IFNAR2		NM_000874.3	NM_000874.3:631	Endogenous	mRNA	100	884.64	955.71	969.58	1094.5	860.03	828.63	862.5	901.99	691.14	1053.9	654.98	934.77	1429.97	833.19	646.19	987.72	704.89	722.84	1054.81	684.45	714.49	745.58	740.1	768.84
IFNB1		NM_002176.2	NM_002176.2:610	Endogenous	mRNA	100	1.97	1.45	2.04	2.14	1.78	3.59	1.88	2	6.33	3.92	7.54	7.34	4.13	10.87	6.34	1.47	4.97	11.27	1.79	7.51	12.46	9.03	8.32	7.34
IFNG		NM_000619.2	NM_000619.2:970	Endogenous	mRNA	95.83	1.97	14.55	2.04	12.83	1.78	1.79	5.64	6.01	4.22	5.88	1	4.01	4.13	4.66	7.74	2.94	6.39	3.32	1.79	5.46	8.01	4.86	4.16	8.68
IFNGR1		NM_000416.1	NM_000416.1:1140	Endogenous	mRNA	100	2377.47	2307.08	2161.65	2312.98	2325.99	2195.34	2360.12	2437.39	2168.44	2239.04	2058.23	2172.68	2268.93	2114.43	2205.36	2421.45	2194.19	2222.24	2452.88	2250.77	2199.52	2093.59	2101.12	2102.96
IGF2R		NM_000876.1	NM_000876.1:2605	Endogenous	mRNA	100	507.48	437.85	420.49	376.23	348.28	412.52	370.18	438.97	458.18	430.96	475.29	474.06	378.16	425.53	534.97	537.28	589.19	565.01	547.07	614.78	474.25	520.44	447.67	543.93
IKBKAP		NM_003640.3	NM_003640.3:1130	Endogenous	mRNA	100	1708.07	1757.22	1745.24	1812.76	1505.05	1503.02	1691.17	1571.47	1613.14	1688.59	1587.05	1567.08	1576.68	1463.72	1792.87	1795.85	1742.71	1768.64	1896.87	1720.01	1600.7	1616.23	1515.55	1637.12
IKBKB		NM_001556.1	NM_001556.1:1995	Endogenous	mRNA	100	448.24	478.58	483.77	448.91	378.48	394.59	430.31	370.82	247.74	429	240.73	226.35	452.55	275.66	242.85	426.88	270.46	284.49	436.23	242.5	243.8	223.74	230.07	248.94
IKBKE		NM_014002.2	NM_014002.2:2470	Endogenous	mRNA	100	47.39	40.73	61.24	64.13	31.98	59.19	39.46	38.08	12.67	5.88	16.46	16.69	28.93	22.52	16.19	33.86	19.17	11.94	25.03	18.44	13.35	14.59	22.87	26.03
IKBKG		NM_003639.2	NM_003639.2:470	Endogenous	mRNA	100	471.94	430.58	430.7	470.29	435.35	410.73	477.28	446.99	370.91	485.81	398.48	393.27	462.88	401.45	391.38	437.19	401.78	433.7	457.68	424.88	319.43	291.84	285.51	312.34
IKZF1		NM_006060.3	NM_006060.3:4485	Endogenous	mRNA	100	9.87	5.82	12.25	6.41	10.66	12.56	7.52	8.02	9.15	15.67	13.03	8.68	10.33	6.21	9.85	7.36	10.65	8.62	8.94	11.61	11.57	10.42	9.01	12.01
IKZF2		NM_016260.2	NM_016260.2:870	Endogenous	mRNA	100	57.26	50.91	55.11	21.38	53.31	66.36	65.77	56.12	49.97	58.77	64.47	60.76	76.46	58.24	54.2	67.71	71.7	80.24	64.36	72.41	59.61	65.32	65.83	80.75
IKZF3		NM_183232.2	NM_183232.2:1176	Endogenous	mRNA	100	3.95	4.36	14.29	2.14	17.77	17.94	7.52	20.04	8.45	5.88	8.23	8.68	6.2	10.87	6.34	16.19	6.39	7.96	5.36	6.15	6.23	11.12	10.39	12.68
IL10		NM_000572.2	NM_000572.2:230	Endogenous	mRNA	100	5.92	7.27	14.29	8.55	7.11	1.79	16.91	18.04	7.04	9.79	6.17	7.34	2.07	10.87	7.04	5.89	12.07	5.31	8.94	11.61	13.35	3.47	5.54	6.01
IL10RA		NM_001558.2	NM_001558.2:150	Endogenous	mRNA	100	15.8	17.46	16.33	8.55	23.1	19.73	15.03	20.04	18.3	7.84	12.35	18.03	24.8	15.53	22.53	17.66	22.01	23.87	17.88	23.22	28.47	25.01	17.32	31.37
IL11RA		NM_147162.1	NM_147162.1:400	Endogenous	mRNA	100	23.7	30.55	18.37	17.1	23.1	23.32	13.15	16.04	44.34	15.67	46.64	40.73	24.8	46.59	37.31	23.55	30.52	34.48	26.82	51.23	48.94	47.25	30.49	32.03
IL12A		NM_000882.2	NM_000882.2:775	Endogenous	mRNA	100	59.24	42.18	42.87	32.07	33.76	41.25	56.37	46.1	24.63	27.42	35.66	38.73	41.33	34.17	35.2	41.22	35.49	30.51	48.27	35.52	52.5	39.61	36.04	58.06
IL12B		NM_002187.2	NM_002187.2:1435	Endogenous	mRNA	100	9.87	5.82	14.29	10.69	5.33	5.38	7.52	8.02	9.85	5.88	6.17	6.01	10.33	14.75	9.15	8.83	6.39	5.97	7.15	9.56	6.23	15.98	11.09	12.01
IL12RB1		NM_005535.1	NM_005535.1:225	Endogenous	mRNA	100	3.95	8.73	6.12	12.83	5.33	8.97	24.43	6.01	13.37	9.79	11.66	13.35	10.33	13.2	9.15	13.25	9.23	8.62	10.73	10.93	15.13	13.2	15.25	12.01
IL13		NM_002188.2	NM_002188.2:516	Endogenous	mRNA	100	1.97	4.36	6.12	6.41	1.78	1.79	3.76	14.03	3.52	1.96	8.23	11.35	14.46	6.99	3.52	14.72	9.23	8.62	1.79	11.61	14.24	9.03	13.17	10.01
IL13RA1		NM_001560.2	NM_001560.2:1230	Endogenous	mRNA	100	1417.79	1454.65	1383.95	1447.21	1473.07	1614.22	1642.31	1583.5	1240.12	1459.39	1317.51	1478.28	1863.91	1514.19	1214.25	1451.4	1257.88	1340.24	1421.31	1291.03	1428.08	1507.13	1483.67	1569.05
IL15		NM_172174.1	NM_172174.1:1685	Endogenous	mRNA	100	21.72	11.64	14.29	17.1	28.43	12.56	20.67	18.04	9.85	15.67	12.35	25.37	31	27.95	17.6	14.72	13.49	20.56	26.82	21.18	21.35	11.81	15.94	20.69
IL16		NM_004513.4	NM_004513.4:1262	Endogenous	mRNA	100	1.97	7.27	6.12	2.14	3.55	7.17	3.76	4.01	9.15	1.96	8.23	4.01	10.33	5.44	6.34	4.42	6.39	11.27	5.36	8.2	7.12	11.81	4.85	14.68
IL17A		NM_002190.2	NM_002190.2:240	Endogenous	mRNA	100	3.95	7.27	8.16	14.96	12.44	7.17	15.03	8.02	11.96	9.79	6.86	6.01	8.27	3.11	9.15	10.3	10.65	7.29	10.73	10.25	8.9	6.95	9.01	6.67
IL17B		NM_014443.2	NM_014443.2:177	Endogenous	mRNA	100	9.87	8.73	8.16	2.14	5.33	3.59	5.64	8.02	7.04	9.79	5.49	8.68	10.33	9.32	7.74	7.36	7.81	7.29	7.15	5.46	11.57	7.64	7.62	8.68
IL17F		NM_052872.3	NM_052872.3:210	Endogenous	mRNA	100	13.82	10.18	14.29	8.55	21.32	16.14	1.88	18.04	16.89	9.79	13.03	16.69	6.2	11.65	14.08	17.66	10.65	9.28	10.73	9.56	16.91	16.68	13.17	16.68
IL18		NM_001562.2	NM_001562.2:48	Endogenous	mRNA	100	11.85	8.73	4.08	4.28	8.88	10.76	11.27	24.05	16.89	13.71	8.92	17.36	16.53	30.28	11.26	4.42	20.59	26.53	23.24	21.86	14.24	20.15	13.17	13.35
IL18R1		NM_003855.2	NM_003855.2:2025	Endogenous	mRNA	100	57.26	71.28	63.28	91.92	127.94	120.17	129.66	122.27	71.79	70.52	70.64	71.44	70.26	66.78	64.06	47.1	58.92	56.37	67.94	62.16	71.18	58.37	54.05	63.4
IL18RAP		NM_003853.2	NM_003853.2:2412	Endogenous	mRNA	95.83	9.87	7.27	6.12	6.41	12.44	10.76	18.79	14.03	4.93	9.79	8.23	2.67	10.33	1	2.82	1.47	1.42	3.98	7.15	4.78	4.45	1.39	3.46	3.34
IL19		NM_013371.3	NM_013371.3:1030	Endogenous	mRNA	100	1.97	13.09	4.08	6.41	5.33	3.59	3.76	8.02	7.04	1.96	5.49	7.34	2.07	6.21	6.34	7.36	7.1	6.63	5.36	4.78	11.57	9.03	4.85	13.35
IL1A		NM_000575.3	NM_000575.3:1085	Endogenous	mRNA	100	1.97	10.18	10.21	6.41	3.55	3.59	9.4	10.02	5.63	3.92	7.54	1.34	6.2	11.65	2.11	4.42	4.26	6.63	5.36	4.78	11.57	4.86	2.08	7.34
IL1B		NM_000576.2	NM_000576.2:840	Endogenous	mRNA	100	5.92	5.82	2.04	10.69	3.55	5.38	1.88	16.04	7.74	1.96	4.12	8.01	4.13	13.98	7.74	8.83	7.81	6.63	3.58	10.93	10.68	9.03	9.01	12.68
IL1R1		NM_000877.2	NM_000877.2:4295	Endogenous	mRNA	100	19.75	16	12.25	19.24	30.21	16.14	24.43	32.07	22.52	13.71	16.46	20.7	18.6	17.08	14.78	22.08	23.43	31.83	23.24	22.54	24.02	21.54	11.78	16.02
IL1R2		NM_173343.1	NM_173343.1:113	Endogenous	mRNA	100	11.85	2.91	8.16	4.28	7.11	12.56	7.52	8.02	8.45	5.88	8.23	12.02	12.4	14.75	7.74	4.42	11.36	12.6	10.73	7.51	10.68	12.51	9.7	16.68
IL1RAP		NM_002182.2	NM_002182.2:460	Endogenous	mRNA	100	90.83	78.55	81.65	55.58	97.73	105.82	105.23	106.23	61.94	76.4	66.53	77.45	84.72	78.43	72.5	95.68	85.18	76.93	71.51	70.36	72.96	80.6	71.38	89.43
IL1RL1		NM_016232.4	NM_016232.4:700	Endogenous	mRNA	100	11.85	4.36	6.12	6.41	5.33	8.97	11.27	8.02	8.45	7.84	8.92	11.35	8.27	6.21	6.34	8.83	6.39	13.26	14.3	6.83	17.8	6.25	7.62	7.34
IL1RL2		NM_003854.2	NM_003854.2:595	Endogenous	mRNA	100	11.85	7.27	4.08	6.41	12.44	5.38	15.03	12.03	10.56	5.88	9.6	13.35	10.33	7.77	8.45	7.36	11.36	10.61	7.15	13.66	20.46	9.73	7.62	8.01
IL1RN		NM_000577.3	NM_000577.3:480	Endogenous	mRNA	100	5.92	8.73	16.33	8.55	12.44	3.59	11.27	16.04	10.56	1.96	9.6	5.34	6.2	4.66	3.52	7.36	2.84	7.29	10.73	6.83	12.46	9.73	5.54	9.34
IL2		NM_000586.2	NM_000586.2:300	Endogenous	mRNA	100	1.97	2.91	8.16	4.28	1.78	1.79	3.76	4.01	9.85	1.96	2.74	4.01	8.27	6.21	4.93	1.47	6.39	7.29	5.36	10.25	11.57	6.25	9.01	4.67
IL20		NM_018724.3	NM_018724.3:292	Endogenous	mRNA	100	7.9	11.64	10.21	8.55	1.78	10.76	11.27	14.03	2.82	11.75	2.74	6.68	10.33	9.32	3.52	7.36	3.55	7.29	7.15	7.51	8.01	5.56	9.7	6.67
IL21		NM_021803.2	NM_021803.2:65	Endogenous	mRNA	100	1.97	7.27	2.04	4.28	5.33	10.76	5.64	10.02	12.67	5.88	8.92	9.35	12.4	3.11	7.74	7.36	7.81	7.29	10.73	8.88	7.12	4.86	4.85	10.01
IL21R		NM_021798.2	NM_021798.2:2080	Endogenous	mRNA	100	7.9	14.55	12.25	10.69	10.66	5.38	5.64	6.01	9.85	17.63	4.8	10.02	8.27	6.99	9.15	8.83	6.39	8.62	12.51	10.25	9.79	9.03	13.17	10.68
IL22		NM_020525.4	NM_020525.4:319	Endogenous	mRNA	100	1.97	4.36	8.16	10.69	7.11	5.38	3.76	10.02	11.96	7.84	8.92	10.02	6.2	9.32	8.45	4.42	8.52	10.61	7.15	11.61	17.8	11.12	9.7	7.34
IL22RA2		NM_181310.1	NM_181310.1:290	Endogenous	mRNA	100	3.95	4.36	2.04	2.14	3.55	5.38	1.88	6.01	7.04	1.96	2.06	4.67	2.07	4.66	6.34	2.94	3.55	5.31	1.79	6.15	8.01	2.08	5.54	5.34
IL23A		NM_016584.2	NM_016584.2:411	Endogenous	mRNA	100	13.82	18.91	12.25	17.1	14.22	14.35	20.67	12.03	23.23	13.71	19.89	17.36	10.33	22.52	29.56	22.08	25.56	21.88	21.45	23.22	30.25	27.1	16.63	24.03
IL23R		NM_144701.2	NM_144701.2:710	Endogenous	mRNA	100	15.8	16	2.04	6.41	8.88	10.76	3.76	6.01	7.04	19.59	6.86	12.02	6.2	6.99	7.74	10.3	12.07	9.95	8.94	6.15	8.01	6.25	8.32	10.01
IL26		NM_018402.1	NM_018402.1:80	Endogenous	mRNA	100	3.95	8.73	6.12	8.55	14.22	3.59	5.64	6.01	11.26	5.88	7.54	6.01	8.27	10.87	8.45	13.25	8.52	16.58	8.94	12.3	8.9	10.42	11.78	6.01
IL27		NM_145659.3	NM_145659.3:143	Endogenous	mRNA	100	3.95	1.45	4.08	2.14	5.33	3.59	3.76	4.01	5.63	5.88	9.6	6.68	12.4	1.55	6.34	4.42	7.1	7.96	5.36	7.51	8.9	3.47	6.93	8.68
IL28A		NM_172138.1	NM_172138.1:589	Endogenous	mRNA	100	13.82	11.64	14.29	8.55	8.88	7.17	7.52	16.04	14.08	23.51	11.66	8.68	16.53	12.42	6.34	7.36	11.36	7.96	19.67	12.3	15.13	11.81	13.86	13.35
IL28A/B		NM_172139.2	NM_172139.2:104	Endogenous	mRNA	100	9.87	8.73	2.04	10.69	7.11	12.56	9.4	14.03	9.15	1.96	7.54	9.35	10.33	10.87	14.08	2.94	6.39	8.62	10.73	16.39	8.9	9.73	11.78	10.68
IL29		NM_172140.1	NM_172140.1:233	Endogenous	mRNA	100	1.97	10.18	6.12	2.14	8.88	1.79	5.64	4.01	6.33	3.92	6.17	6.68	2.07	5.44	5.63	4.42	2.84	5.97	1.79	4.78	12.46	6.25	6.93	9.34
IL2RA		NM_000417.1	NM_000417.1:1000	Endogenous	mRNA	100	7.9	4.36	8.16	10.69	1.78	7.17	1.88	8.02	4.93	3.92	4.8	9.35	4.13	8.54	3.52	10.3	7.81	7.29	5.36	5.46	4.45	3.47	8.32	8.68
IL2RB		NM_000878.2	NM_000878.2:1980	Endogenous	mRNA	100	5.92	5.82	10.21	19.24	10.66	5.38	13.15	10.02	9.15	11.75	10.97	16.69	14.46	17.86	11.97	10.3	17.75	11.27	16.09	10.25	17.8	13.9	15.25	16.02
IL2RG		NM_000206.1	NM_000206.1:595	Endogenous	mRNA	100	7.9	4.36	16.33	4.28	14.22	8.97	15.03	14.03	14.78	17.63	15.09	10.68	20.66	10.09	15.49	16.19	5.68	10.61	17.88	10.93	20.46	10.42	9.01	8.68
IL3		NM_000588.3	NM_000588.3:130	Endogenous	mRNA	100	3.95	2.91	4.08	8.55	3.55	1.79	5.64	2	3.52	5.88	4.12	8.01	4.13	13.2	7.04	4.42	9.94	11.27	8.94	9.56	14.24	6.25	7.62	8.01
IL32		NM_001012633.1	NM_001012633.1:758	Endogenous	mRNA	100	36060.9	36183	40273.2	38476.2	43353.3	36257.2	36782.9	36977.7	25306.2	39397.8	22422.4	26550.9	45246.4	25977.3	24175.2	32546.1	24248.2	23560.7	48151.2	21801.4	38439	24265.6	30200.8	24929.2
IL4		NM_000589.2	NM_000589.2:625	Endogenous	mRNA	100	1.97	2.91	2.04	2.14	1.78	5.38	5.64	2	3.52	3.92	2.74	5.34	4.13	5.44	4.93	5.89	6.39	5.97	1.79	3.42	5.34	4.86	4.85	4
IL4R		NM_000418.2	NM_000418.2:705	Endogenous	mRNA	100	67.14	84.37	79.61	61.99	60.42	66.36	88.32	74.16	122.46	62.69	91.9	146.89	88.86	133.56	116.85	64.77	100.09	128.65	64.36	129.1	122.79	121.6	123.35	137.48
IL5		NM_000879.2	NM_000879.2:105	Endogenous	mRNA	100	1.97	1.45	8.16	4.28	5.33	3.59	3.76	10.02	5.63	3.92	8.92	8.68	2.07	3.88	3.52	7.36	7.81	7.29	1.79	8.88	10.68	5.56	8.32	8.68
IL6		NM_000600.1	NM_000600.1:220	Endogenous	mRNA	100	3.95	4.36	4.08	4.28	1.78	3.59	1.88	6.01	4.93	1.96	8.92	8.68	4.13	4.66	7.74	5.89	7.1	8.62	1.79	6.15	11.57	4.86	7.62	12.68
IL6R		NM_000565.2	NM_000565.2:993	Endogenous	mRNA	100	15.8	24.73	6.12	19.24	35.54	21.52	22.55	22.05	28.86	21.55	24	26.04	24.8	20.97	29.56	29.44	26.97	35.15	16.09	39.62	35.59	29.88	31.88	33.37
IL6ST		NM_002184.2	NM_002184.2:2505	Endogenous	mRNA	100	1153.19	1128.81	1112.46	1145.8	1370.01	1495.85	1377.36	1503.32	1251.38	1087.2	1258.53	1413.51	1105.54	1334.82	1412.76	1288.01	1494.26	1466.9	1210.35	1543.77	1259.03	1286.87	1294.49	1412.88
IL7		NM_000880.2	NM_000880.2:38	Endogenous	mRNA	100	1.97	1.45	2.04	2.14	1.78	3.59	1.88	2	9.15	3.92	4.8	8.68	8.27	7.77	5.63	2.94	3.55	6.63	1.79	8.2	10.68	9.03	4.85	9.34
IL7R		NM_002185.2	NM_002185.2:1610	Endogenous	mRNA	100	5.92	2.91	10.21	8.55	5.33	7.17	7.52	6.01	8.45	9.79	7.54	15.36	10.33	5.44	7.74	8.83	12.78	7.29	8.94	7.51	13.35	13.9	6.24	10.01
IL8		NM_000584.2	NM_000584.2:25	Endogenous	mRNA	100	1.97	18.91	2.04	14.96	17.77	12.56	16.91	8.02	16.89	17.63	21.26	35.39	26.86	39.6	28.86	27.97	19.88	24.54	23.24	19.81	24.91	27.1	20.79	32.03
IL9		NM_000590.1	NM_000590.1:300	Endogenous	mRNA	100	1.97	1.45	2.04	4.28	1.78	7.17	5.64	4.01	3.52	1.96	8.23	2.67	2.07	3.88	2.82	1.47	4.26	3.32	3.58	2.73	5.34	3.47	2.08	2
ILF3		NM_001137673.1	NM_001137673.1:730	Endogenous	mRNA	100	15115.9	15243.3	14858	14343.9	13783.6	13181	13777.4	13435.7	17001.3	14836.9	16186.7	15750.3	14212.9	14753.6	16475.1	14668.5	16033.7	16315.7	14619	16149.5	17279.4	16546.5	17043.2	16562.1
IRAK1		NM_001569.3	NM_001569.3:1995	Endogenous	mRNA	100	4672.01	4432.33	4729.5	4401.5	4150.89	3743.2	4000.55	3597.95	4452.31	4456.54	3897.67	4384.76	4713.51	4318.94	3847.6	3981.78	3668.57	3702.41	4288.97	3827.33	3223.64	3034.42	3012.39	2985.93
IRAK2		NM_001570.3	NM_001570.3:1285	Endogenous	mRNA	100	195.49	181.83	146.97	181.7	174.14	138.11	163.48	164.36	121.06	211.56	106.31	126.19	231.44	115.7	149.93	251.71	139.84	120.69	185.93	154.38	131.69	124.38	130.28	132.81
IRAK3		NM_007199.1	NM_007199.1:1735	Endogenous	mRNA	100	1.97	4.36	2.04	2.14	10.66	7.17	5.64	8.02	9.15	1.96	4.8	7.34	2.07	2.33	4.22	8.83	3.55	6.63	10.73	6.83	5.34	6.25	5.54	7.34
IRAK4		NM_016123.1	NM_016123.1:2175	Endogenous	mRNA	100	209.31	213.83	195.96	183.84	225.67	233.17	210.46	188.42	146.39	158.67	147.46	198.97	144.65	194.13	157.68	167.81	171.79	173.75	189.51	159.16	178.84	182.05	173.94	170.85
IRF1		NM_002198.1	NM_002198.1:510	Endogenous	mRNA	100	84.91	62.55	53.07	40.62	95.95	78.92	112.74	82.18	58.42	72.48	67.21	287.78	231.44	210.43	46.46	66.24	58.21	163.14	78.66	74.46	74.74	71.57	78.31	98.11
IRF3		NM_001571.5	NM_001571.5:1303	Endogenous	mRNA	100	159.95	160.01	175.54	192.39	147.48	130.93	140.93	128.28	85.86	131.25	61.73	73.45	113.65	73.77	87.99	157.5	78.08	78.25	171.63	66.94	78.3	80.6	82.46	85.43
IRF4		NM_002460.1	NM_002460.1:325	Endogenous	mRNA	100	13.82	13.09	2.04	12.83	12.44	12.56	13.15	14.03	17.6	13.71	15.77	6.68	22.73	17.86	16.19	8.83	17.04	9.28	7.15	10.93	24.02	14.59	17.32	16.68
IRF5		NM_002200.3	NM_002200.3:1845	Endogenous	mRNA	100	7.9	10.18	12.25	2.14	14.22	3.59	1.88	8.02	7.74	9.79	6.17	6.68	14.46	6.21	3.52	11.78	5.68	5.31	16.09	7.51	11.57	6.25	8.32	6.67
IRF7		NM_001572.3	NM_001572.3:1763	Endogenous	mRNA	100	17.77	10.18	28.58	34.2	31.98	25.11	67.65	82.18	8.45	27.42	9.6	84.8	254.17	85.42	14.08	23.55	12.07	89.53	84.03	23.91	13.35	6.95	22.18	25.36
IRF8		NM_002163.2	NM_002163.2:253	Endogenous	mRNA	100	73.06	87.28	65.32	100.47	129.72	107.61	120.26	92.2	62.64	76.4	64.47	148.9	126.05	136.67	67.58	72.13	78.79	78.92	84.03	64.21	93.43	65.32	69.99	79.42
IRGM		NM_001145805.1	NM_001145805.1:1412	Endogenous	mRNA	100	5.92	7.27	10.21	2.14	8.88	7.17	16.91	8.02	12.67	7.84	10.97	8.01	8.27	17.08	7.74	5.89	7.81	7.29	10.73	8.88	11.57	9.03	9.01	9.34
ITGA2B		NM_000419.3	NM_000419.3:740	Endogenous	mRNA	100	96.76	90.19	71.44	74.82	131.49	120.17	112.74	96.21	56.3	43.1	52.81	58.76	43.39	50.47	66.17	64.77	71.7	63.66	66.15	76.51	56.06	81.3	64.45	74.75
ITGA4		NM_000885.4	NM_000885.4:975	Endogenous	mRNA	100	45.42	50.91	36.74	49.17	115.5	114.79	90.2	102.23	34.49	52.89	20.58	24.04	51.66	34.94	26.75	78.02	34.07	31.17	50.06	34.15	42.71	40.3	49.2	42.05
ITGA5		NM_002205.2	NM_002205.2:925	Endogenous	mRNA	100	466.02	427.67	408.24	414.71	550.85	563.18	477.28	577.28	313.9	444.67	332.64	335.18	529	328.46	325.91	507.84	367	354.13	518.47	349.06	386.16	388.42	424.11	431.14
ITGA6		NM_000210.1	NM_000210.1:3065	Endogenous	mRNA	100	560.8	506.22	453.15	534.42	604.15	629.55	539.29	671.48	351.2	487.77	373.79	313.82	361.62	330.02	404.75	594.69	430.89	421.1	559.59	409.17	426.2	472.5	435.89	477.19
ITGAE		NM_002208.4	NM_002208.4:3405	Endogenous	mRNA	100	1804.82	1621.94	1608.48	1613.95	1956.39	1770.26	1892.23	1810	1259.82	1124.42	1257.16	1224.55	1103.47	1241.64	1704.18	1530.89	1718.58	1697.02	1612.61	1748.02	1876.53	1729.49	1774.73	1751.24
ITGAL		NM_002209.2	NM_002209.2:3905	Endogenous	mRNA	100	1.97	7.27	8.16	17.1	5.33	1.79	1.88	6.01	9.15	3.92	6.17	14.02	2.07	6.99	7.74	7.36	4.97	2.65	7.15	10.25	12.46	9.03	6.93	9.34
ITGAM		NM_000632.3	NM_000632.3:515	Endogenous	mRNA	100	7.9	10.18	12.25	2.14	14.22	16.14	11.27	6.01	9.15	3.92	8.92	8.01	22.73	10.87	7.74	8.83	4.26	10.61	10.73	7.51	8.9	4.17	9.7	8.01
ITGAX		NM_000887.3	NM_000887.3:700	Endogenous	mRNA	100	3.95	10.18	12.25	4.28	8.88	7.17	7.52	4.01	14.78	3.92	8.92	9.35	14.46	11.65	10.56	5.89	12.07	12.6	7.15	14.34	15.13	13.2	11.09	13.35
ITGB1		NM_033666.2	NM_033666.2:2000	Endogenous	mRNA	100	2037.83	1989.97	1867.72	2026.53	1824.9	1874.29	1882.83	1928.26	1323.87	1904.07	1259.22	1183.83	1640.74	1160.88	1295.2	1934.22	1380.68	1322.34	1920.11	1418.09	1318.64	1459.19	1344.39	1386.85
ITGB2		NM_000211.2	NM_000211.2:520	Endogenous	mRNA	100	7.9	14.55	12.25	8.55	7.11	3.59	5.64	10.02	5.63	5.88	7.54	5.34	10.33	7.77	4.22	11.78	9.94	11.27	3.58	15.03	11.57	11.81	10.39	12.01
ITLN1		NM_017625.2	NM_017625.2:975	Endogenous	mRNA	100	7.9	5.82	6.12	2.14	12.44	3.59	5.64	4.01	8.45	15.67	6.86	8.01	8.27	15.53	9.85	2.94	11.36	9.95	12.51	11.61	19.57	6.95	11.09	10.68
ITLN2		NM_080878.2	NM_080878.2:135	Endogenous	mRNA	100	5.92	13.09	4.08	4.28	1.78	12.56	15.03	10.02	3.52	11.75	4.12	7.34	16.53	6.21	5.63	4.42	3.55	3.32	5.36	6.83	11.57	4.17	4.85	3.34
JAK1		NM_002227.1	NM_002227.1:285	Endogenous	mRNA	100	651.63	634.23	561.34	626.34	836.93	860.92	764.78	833.84	537.01	585.72	614.52	616.95	597.2	588.59	675.76	759.56	685.02	651.88	758.03	644.83	665.55	703.88	732.48	744.81
JAK2		NM_004972.2	NM_004972.2:455	Endogenous	mRNA	100	191.54	145.47	120.43	149.64	143.93	179.36	146.57	198.44	90.79	148.88	102.88	115.51	150.85	114.15	121.07	169.28	132.03	148.55	166.27	139.35	131.69	129.24	142.75	128.14
JAK3		NM_000215.2	NM_000215.2:1715	Endogenous	mRNA	100	15.8	17.46	14.29	12.83	12.44	7.17	22.55	8.02	18.3	25.47	21.26	27.38	14.46	21.74	21.12	22.08	29.1	17.91	14.3	27.32	24.91	22.24	20.79	16.68
KCNJ2		NM_000891.2	NM_000891.2:620	Endogenous	mRNA	100	13.82	10.18	20.41	8.55	21.32	19.73	24.43	30.07	14.08	15.67	10.97	12.69	24.8	17.08	11.97	8.83	10.65	13.93	16.09	24.59	18.69	13.2	10.39	16.02
KIR3DL1		NM_013289.2	NM_013289.2:1691	Endogenous	mRNA	100	5.92	7.27	10.21	6.41	1.78	3.59	13.15	8.02	5.63	3.92	9.6	8.01	4.13	14.75	7.04	2.94	7.81	7.29	5.36	10.93	13.35	11.81	10.39	7.34
KIR3DL2		NM_006737.2	NM_006737.2:884	Endogenous	mRNA	100	13.82	14.55	8.16	10.69	10.66	8.97	13.15	4.01	11.96	3.92	13.72	12.69	12.4	13.98	14.78	19.14	16.33	17.24	16.09	10.93	24.91	13.9	18.02	12.68
KIR3DL3		NM_153443.3	NM_153443.3:539	Endogenous	mRNA	100	9.87	16	4.08	4.28	3.55	10.76	9.4	6.01	8.45	5.88	8.23	7.34	12.4	7.77	9.15	2.94	7.81	11.27	8.94	8.2	12.46	8.34	13.17	10.68
KIR_Activating_Subgroup_1		NM_001083539.1	NM_001083539.1:1146	Endogenous	mRNA	100	11.85	8.73	6.12	12.83	1.78	8.97	20.67	12.03	19.71	5.88	11.66	18.7	8.27	13.98	17.6	13.25	14.2	11.94	17.88	19.81	14.24	18.76	8.32	14.02
KIR_Activating_Subgroup_2		NM_014512.1	NM_014512.1:718	Endogenous	mRNA	100	15.8	5.82	6.12	4.28	3.55	7.17	7.52	8.02	8.45	9.79	4.8	6.68	8.27	4.66	6.34	5.89	11.36	7.29	12.51	15.71	12.46	10.42	7.62	15.35
KIR_Inhibiting_Subgroup_1		NM_014218.2	NM_014218.2:872	Endogenous	mRNA	100	3.95	5.82	2.04	6.41	7.11	5.38	11.27	6.01	11.26	19.59	10.97	12.69	10.33	6.21	13.37	10.3	7.1	11.27	1.79	8.88	22.24	13.2	9.01	12.68
KIR_Inhibiting_Subgroup_2		NM_014511.3	NM_014511.3:592	Endogenous	mRNA	100	9.87	8.73	2.04	4.28	8.88	8.97	9.4	2	11.96	9.79	3.43	8.01	12.4	10.09	8.45	4.42	6.39	5.97	8.94	7.51	8.9	10.42	4.16	10.01
KIT		NM_000222.2	NM_000222.2:2644	Endogenous	mRNA	100	270.53	269.11	220.45	239.42	200.79	195.5	202.94	190.42	273.08	250.74	248.96	269.08	293.43	228.29	204.84	263.49	235.67	212.87	244.93	244.54	261.59	282.8	277.19	251.61
KLRAP1		NR_028045.1	NR_028045.1:414	Endogenous	mRNA	100	47.39	68.37	44.91	40.62	44.42	30.49	45.1	40.09	45.75	58.77	54.87	52.75	43.39	40.38	38.01	39.74	34.78	45.09	50.06	43.72	44.49	43.08	47.82	50.72
KLRB1		NM_002258.2	NM_002258.2:85	Endogenous	mRNA	100	7.9	1.45	6.12	6.41	3.55	3.59	5.64	6.01	5.63	1.96	4.12	8.01	6.2	9.32	7.74	4.42	3.55	6.63	5.36	6.83	8.01	6.95	4.16	5.34
KLRC1		NM_002259.3	NM_002259.3:335	Endogenous	mRNA	100	13.82	8.73	12.25	4.28	7.11	26.9	13.15	10.02	9.85	9.79	10.29	10.02	6.2	7.77	8.45	10.3	6.39	15.25	10.73	13.66	12.46	17.37	9.7	10.68
KLRC2		NM_002260.3	NM_002260.3:942	Endogenous	mRNA	100	19.75	17.46	16.33	23.51	24.88	19.73	1.88	14.03	15.48	13.71	13.72	22.7	4.13	19.41	11.26	26.5	14.2	21.88	17.88	17.76	17.8	17.37	14.55	14.68
KLRC3		NM_007333.2	NM_007333.2:598	Endogenous	mRNA	100	7.9	10.18	4.08	6.41	3.55	23.32	16.91	24.05	8.45	17.63	17.83	17.36	16.53	13.98	10.56	5.89	20.59	13.26	21.45	15.03	14.24	12.51	15.25	26.7
KLRC4		NM_013431.2	NM_013431.2:276	Endogenous	mRNA	100	5.92	11.64	6.12	12.83	10.66	8.97	7.52	10.02	6.33	3.92	8.92	14.02	10.33	7.77	9.85	17.66	12.78	9.95	12.51	7.51	15.13	11.81	10.39	8.01
KLRD1		NM_002262.3	NM_002262.3:542	Endogenous	mRNA	100	21.72	4.36	10.21	8.55	19.55	5.38	1.88	6.01	8.45	17.63	6.86	9.35	22.73	6.21	7.04	7.36	4.97	11.27	10.73	12.3	13.35	11.81	8.32	14.68
KLRF1		NM_016523.1	NM_016523.1:275	Endogenous	mRNA	100	1.97	8.73	8.16	6.41	3.55	1.79	9.4	6.01	4.22	5.88	4.8	5.34	4.13	3.88	7.04	1.47	7.1	4.64	5.36	5.46	5.34	5.56	5.54	6.01
KLRF2		NM_001190765.1	NM_001190765.1:535	Endogenous	mRNA	100	1.97	2.91	6.12	8.55	10.66	3.59	5.64	2	4.93	1.96	6.86	4.67	6.2	6.21	6.34	4.42	5.68	5.97	1.79	12.98	5.34	5.56	4.16	4
KLRG1		NM_005810.3	NM_005810.3:65	Endogenous	mRNA	100	7.9	13.09	10.21	10.69	7.11	7.17	15.03	14.03	4.22	21.55	6.17	8.68	12.4	3.11	3.52	13.25	5.68	3.98	19.67	7.51	2.67	5.56	2.77	4
KLRG2		NM_198508.2	NM_198508.2:1347	Endogenous	mRNA	100	231.03	178.92	232.7	203.08	131.49	154.25	144.69	134.3	199.18	141.04	185.18	193.63	144.65	169.28	165.42	131.01	151.2	159.82	114.42	150.96	185.07	173.02	159.39	164.18
KLRK1		NM_007360.1	NM_007360.1:760	Endogenous	mRNA	100	3.95	7.27	8.16	4.28	12.44	5.38	9.4	22.05	7.04	5.88	3.43	4.67	14.46	4.66	6.34	7.36	4.97	7.29	12.51	4.78	8.9	7.64	10.39	7.34
LAG3		NM_002286.5	NM_002286.5:1735	Endogenous	mRNA	100	15.8	13.09	16.33	6.41	15.99	21.52	11.27	18.04	21.11	23.51	14.4	22.7	12.4	20.97	14.78	14.72	20.59	18.57	14.3	21.86	19.57	18.07	18.02	20.69
LAIR1		NM_002287.3	NM_002287.3:1195	Endogenous	mRNA	100	1.97	5.82	4.08	2.14	8.88	7.17	3.76	4.01	8.45	11.75	10.29	6.68	6.2	9.32	7.74	7.36	7.81	14.59	1.79	10.93	8.01	11.12	8.32	8.01
LAMP3		NM_014398.3	NM_014398.3:1400	Endogenous	mRNA	100	35.54	42.18	42.87	44.89	56.86	48.43	60.13	58.13	34.49	35.26	34.98	412.64	407.09	356.42	31.68	39.74	34.07	115.39	37.54	41.67	39.15	50.03	56.13	74.75
LCK		NM_005356.2	NM_005356.2:1260	Endogenous	mRNA	100	3.95	7.27	2.04	2.14	8.88	1.79	7.52	4.01	10.56	7.84	6.17	14.02	12.4	17.86	7.74	2.94	9.94	5.31	8.94	6.15	12.46	9.03	10.39	4
LCP2		NM_005565.3	NM_005565.3:1210	Endogenous	mRNA	100	5.92	5.82	2.04	4.28	5.33	5.38	9.4	8.02	11.96	5.88	8.23	12.02	6.2	19.41	15.49	1.47	9.23	9.28	5.36	16.39	21.35	6.95	14.55	6.01
LEF1		NM_016269.3	NM_016269.3:1165	Endogenous	mRNA	100	894.51	804.42	734.84	788.81	739.2	821.46	742.23	823.82	647.51	983.38	689.28	670.37	977.42	665.47	599.03	1037.76	678.63	622.7	951.12	658.49	659.32	751.13	689.52	758.16
LGALS3		NM_001177388.1	NM_001177388.1:495	Endogenous	mRNA	100	122.43	96.01	100.02	89.78	259.43	208.06	197.3	226.5	82.35	148.88	98.76	101.49	144.65	102.5	114.03	119.23	122.81	97.48	144.81	97	61.39	68.1	45.74	58.06
LIF		NM_002309.3	NM_002309.3:1240	Endogenous	mRNA	100	33.57	26.18	26.54	8.55	10.66	26.9	18.79	26.06	38.01	97.95	96.02	44.07	138.45	95.51	19.01	38.27	30.52	30.51	33.97	32.11	28.47	40.3	24.25	52.06
LILRA1		NM_006863.1	NM_006863.1:1719	Endogenous	mRNA	100	5.92	7.27	8.16	6.41	7.11	10.76	5.64	18.04	9.15	3.92	8.23	9.35	6.2	10.09	14.08	8.83	15.62	7.29	5.36	8.2	11.57	12.51	9.01	10.68
LILRA2		NM_006866.2	NM_006866.2:317	Endogenous	mRNA	100	3.95	2.91	2.04	2.14	5.33	5.38	7.52	4.01	7.74	1.96	2.06	6.68	4.13	11.65	4.22	1.47	10.65	7.96	3.58	12.3	7.12	9.03	9.01	5.34
LILRA3		NM_006865.3	NM_006865.3:1123	Endogenous	mRNA	100	17.77	18.91	8.16	2.14	8.88	19.73	16.91	26.06	23.93	9.79	16.46	26.04	12.4	21.74	16.19	17.66	22.72	25.2	21.45	27.32	43.6	30.57	27.03	18.02
LILRA4		NM_012276.3	NM_012276.3:1577	Endogenous	mRNA	100	1.97	1.45	6.12	2.14	5.33	1.79	5.64	4.01	7.04	7.84	4.8	8.68	2.07	3.11	8.45	1.47	4.97	9.95	8.94	7.51	13.35	9.03	9.7	9.34
LILRA5		NM_181879.2	NM_181879.2:545	Endogenous	mRNA	100	13.82	13.09	12.25	10.69	14.22	8.97	11.27	14.03	5.63	25.47	4.12	7.34	24.8	5.44	7.74	8.83	9.94	10.61	10.73	4.78	15.13	8.34	6.93	5.34
LILRA6		NM_024318.2	NM_024318.2:1900	Endogenous	mRNA	100	9.87	7.27	6.12	8.55	7.11	1.79	7.52	12.03	9.85	9.79	11.66	10.02	12.4	10.87	7.04	10.3	9.23	9.28	7.15	8.2	7.12	7.64	10.39	12.01
LILRB1		NM_001081637.1	NM_001081637.1:2332	Endogenous	mRNA	100	7.9	2.91	4.08	12.83	3.55	7.17	7.52	8.02	1.41	3.92	2.06	8.68	8.27	10.09	2.82	4.42	7.1	7.96	7.15	8.88	8.01	2.78	6.24	6.01
LILRB2		NM_005874.1	NM_005874.1:595	Endogenous	mRNA	100	1.97	5.82	12.25	2.14	5.33	3.59	5.64	8.02	14.08	7.84	8.23	10.68	6.2	9.32	7.04	7.36	8.52	13.26	3.58	10.93	14.24	13.9	16.63	14.68
LILRB3		NM_006864.2	NM_006864.2:2235	Endogenous	mRNA	100	7.9	4.36	2.04	14.96	1.78	5.38	5.64	12.03	11.96	7.84	9.6	14.02	6.2	8.54	14.78	2.94	7.1	9.28	8.94	7.51	14.24	6.25	10.39	6.01
LILRB4		NM_001081438.1	NM_001081438.1:1825	Endogenous	mRNA	100	1.97	4.36	4.08	2.14	3.55	7.17	1.88	4.01	4.93	5.88	5.49	8.01	2.07	6.21	4.22	1.47	6.39	5.97	10.73	6.15	1.78	4.17	2.08	7.34
LILRB5		NM_001081442.1	NM_001081442.1:327	Endogenous	mRNA	100	1.97	4.36	10.21	4.28	3.55	5.38	3.76	10.02	4.93	1.96	6.17	6.68	6.2	4.66	4.22	2.94	9.23	9.95	3.58	7.51	12.46	7.64	8.32	9.34
LITAF		NM_004862.3	NM_004862.3:1000	Endogenous	mRNA	100	691.13	669.14	589.91	547.25	790.73	868.09	738.48	857.9	649.62	609.22	661.16	651.67	588.93	646.05	745.45	747.78	794.34	736.77	752.67	758.91	726.94	778.93	709.61	819.56
LTA		NM_000595.2	NM_000595.2:885	Endogenous	mRNA	100	3.95	4.36	6.12	10.69	5.33	7.17	22.55	10.02	12.67	19.59	21.26	21.37	10.33	25.62	11.26	7.36	7.81	19.89	10.73	17.08	21.35	18.07	14.55	12.68
LTB4R		NM_181657.3	NM_181657.3:2400	Endogenous	mRNA	100	84.91	129.46	97.98	94.06	95.95	86.09	101.47	102.23	116.13	144.96	120.71	138.21	121.92	97.84	95.03	76.54	115.71	115.39	73.3	103.83	101.43	98.67	111.57	118.13
LTB4R2		NM_019839.4	NM_019839.4:1250	Endogenous	mRNA	100	163.9	152.74	146.97	143.22	119.05	148.87	163.48	142.31	111.2	172.38	139.23	179.61	154.98	125.79	140.78	141.31	123.52	129.98	114.42	123.64	137.02	121.6	119.19	123.47
LTBR		NM_002342.1	NM_002342.1:1435	Endogenous	mRNA	100	1.97	2.91	2.04	4.28	3.55	5.38	9.4	6.01	9.85	3.92	6.17	8.68	8.27	6.99	3.52	1.47	4.97	7.29	7.15	4.78	8.01	9.73	5.54	6.67
LTF		NM_002343.2	NM_002343.2:590	Endogenous	mRNA	100	3.95	7.27	10.21	2.14	7.11	7.17	7.52	8.02	6.33	1.96	5.49	9.35	14.46	11.65	10.56	4.42	10.65	7.96	5.36	9.56	8.01	6.25	9.7	9.34
LY96		NM_015364.2	NM_015364.2:360	Endogenous	mRNA	100	5.92	7.27	4.08	12.83	3.55	7.17	3.76	14.03	8.45	3.92	4.8	6.01	6.2	6.99	11.26	4.42	4.26	6.63	5.36	6.83	4.45	9.03	9.7	7.34
MAF		NM_005360.4	NM_005360.4:2198	Endogenous	mRNA	100	71.09	82.92	57.15	64.13	69.3	50.22	67.65	58.13	71.08	60.73	68.58	76.12	74.39	79.98	102.77	70.66	102.22	112.74	105.48	91.53	87.2	62.54	86.62	96.77
MALT1		NM_006785.2	NM_006785.2:909	Endogenous	mRNA	100	564.75	493.13	518.47	547.25	540.18	495.03	524.26	571.26	442.7	434.88	456.77	494.76	522.81	514.82	485	513.73	444.37	505.33	486.29	491.14	413.74	469.02	449.05	461.84
MAP4K1		NM_007181.3	NM_007181.3:780	Endogenous	mRNA	100	25.67	23.27	40.82	36.34	35.54	21.52	18.79	28.06	26.74	37.22	26.75	39.39	35.13	20.19	27.45	27.97	34.07	39.79	32.18	25.27	35.59	38.91	38.11	34.04
MAP4K2		NM_004579.2	NM_004579.2:1610	Endogenous	mRNA	100	248.81	261.84	210.25	262.94	207.9	265.45	195.42	228.5	164.69	207.65	196.84	204.32	233.51	177.04	239.33	253.19	238.51	228.13	293.2	213.81	211.77	200.81	220.37	230.25
MAP4K4		NM_004834.3	NM_004834.3:3315	Endogenous	mRNA	100	1939.1	2055.42	1965.69	1923.92	2015.03	1928.1	2038.8	2168.79	1321.76	2609.28	1471.14	1233.23	2374.32	1306.86	1349.4	2380.23	1379.97	1353.5	2211.53	1342.26	1257.25	1463.36	1278.55	1430.9
MAPK1		NM_138957.2	NM_138957.2:430	Endogenous	mRNA	100	3230.52	3178.42	3247.58	3253.56	2933.7	3029.36	3087.32	3124.91	3825.92	3463.37	3851.72	3552.14	3267.02	3658.9	4047.51	3267.85	4105.85	4069.8	3343.21	4261.09	3984.4	4109.35	3759.43	4054.43
MAPK11		NM_002751.5	NM_002751.5:1310	Endogenous	mRNA	100	25.67	40.73	38.78	29.93	31.98	26.9	37.58	36.08	33.08	41.14	32.23	34.05	24.8	42.71	28.16	38.27	22.01	35.15	46.48	38.25	44.49	36.13	34.65	31.37
MAPK14		NM_001315.1	NM_001315.1:450	Endogenous	mRNA	100	1084.08	1003.71	1026.73	1132.97	1110.58	1088.7	1091.74	1052.33	1311.2	1100.91	1362.09	1450.9	1169.6	1407.03	1400.79	1162.89	1440.31	1445.68	1160.29	1555.39	1450.33	1418.89	1559.21	1539.01
MAPKAPK2		NM_004759.3	NM_004759.3:710	Endogenous	mRNA	100	803.68	800.06	775.66	812.32	652.13	724.61	762.9	699.55	544.05	948.12	519.19	524.81	996.02	524.92	516.67	834.63	504.71	505.99	849.21	465.18	579.24	536.43	528.75	539.92
MARCO		NM_006770.3	NM_006770.3:1434	Endogenous	mRNA	100	1.97	13.09	2.04	2.14	1.78	3.59	3.76	2	4.93	9.79	8.92	6.68	12.4	8.54	4.22	11.78	4.97	7.29	1.79	6.83	8.9	4.86	9.7	5.34
MASP1		NM_139125.3	NM_139125.3:35	Endogenous	mRNA	100	37.52	13.09	14.29	21.38	17.77	10.76	20.67	28.06	28.15	39.18	25.38	18.03	18.6	17.86	19.71	33.86	18.46	25.2	23.24	25.96	29.36	22.93	29.11	24.69
MASP2		NM_139208.1	NM_139208.1:330	Endogenous	mRNA	100	11.85	8.73	8.16	4.28	5.33	3.59	11.27	12.03	9.15	7.84	7.54	4.01	8.27	7.77	4.22	11.78	4.26	7.29	14.3	7.51	7.12	5.56	8.32	7.34
MBL2		NM_000242.2	NM_000242.2:1756	Endogenous	mRNA	100	1.97	4.36	10.21	2.14	7.11	8.97	1.88	4.01	4.93	3.92	6.17	12.02	2.07	9.32	9.85	2.94	10.65	5.97	1.79	8.2	12.46	11.81	6.93	6.01
MBP		NM_002385.2	NM_002385.2:132	Endogenous	mRNA	100	9.87	5.82	16.33	12.83	7.11	30.49	18.79	16.04	16.19	13.71	15.09	16.02	18.6	17.08	7.74	11.78	8.52	7.96	5.36	5.46	8.9	13.2	10.39	14.68
MCL1		NM_021960.3	NM_021960.3:1260	Endogenous	mRNA	100	5485.56	5188.75	5190.82	5277.95	4683.96	4647.17	4755.94	4826.67	3609.14	5516.31	3673.4	4729.29	6457.58	4374.07	3889.83	5967.51	3949.68	4339.04	5962.36	3769.95	3716.58	3766.1	3856.45	3911.6
MIF		NM_002415.1	NM_002415.1:319	Endogenous	mRNA	100	12090.8	11874.3	12584.1	12020.2	8808.19	8966.11	8797.83	8741.32	15647.8	12405.8	14053.7	15576.7	12822.2	14453.1	14381	12874.2	14161.8	13826.2	14107.6	14111.9	15747.2	15806.5	15866.5	15716.5
MME		NM_000902.2	NM_000902.2:5059	Endogenous	mRNA	100	13.82	29.09	22.45	12.83	51.53	50.22	58.25	58.13	19	17.63	14.4	19.36	24.8	17.08	42.23	76.54	48.98	47.08	50.06	45.77	33.81	38.91	36.73	49.39
MR1		NM_001531.2	NM_001531.2:7695	Endogenous	mRNA	100	9.87	32	26.54	19.24	17.77	10.76	30.07	32.07	19.71	47.01	19.89	34.05	41.33	24.07	29.56	42.69	33.36	33.16	19.67	33.47	32.03	25.01	28.41	35.37
MRC1		NM_002438.2	NM_002438.2:525	Endogenous	mRNA	100	3.95	4.36	8.16	2.14	8.88	3.59	7.52	8.02	9.85	9.79	12.35	14.02	14.46	10.87	11.97	7.36	7.81	15.25	8.94	10.93	13.35	8.34	10.39	10.68
MS4A1		NM_152866.2	NM_152866.2:620	Endogenous	mRNA	100	3.95	4.36	2.04	6.41	5.33	3.59	9.4	2	6.33	5.88	7.54	8.68	6.2	8.54	7.04	7.36	8.52	6.63	5.36	8.88	9.79	9.73	11.78	6.67
MSR1		NM_002445.3	NM_002445.3:326	Endogenous	mRNA	100	1.97	2.91	8.16	2.14	7.11	7.17	3.76	10.02	4.22	3.92	4.8	5.34	10.33	6.99	4.93	2.94	7.81	5.31	5.36	8.88	5.34	9.03	4.85	5.34
MUC1		NM_001018017.1	NM_001018017.1:725	Endogenous	mRNA	100	29.62	24.73	20.41	21.38	21.32	17.94	16.91	10.02	12.67	13.71	24.69	25.37	31	28.73	23.23	23.55	22.01	25.2	21.45	23.22	22.24	20.15	22.87	26.7
MX1		NM_002462.2	NM_002462.2:1485	Endogenous	mRNA	100	5.92	7.27	4.08	2.14	12.44	5.38	13.15	14.03	9.85	15.67	6.86	40.06	53.73	34.94	10.56	5.89	7.1	31.17	16.09	12.98	5.34	9.73	8.32	10.01
MYD88		NM_002468.3	NM_002468.3:2145	Endogenous	mRNA	100	21.72	17.46	10.21	17.1	15.99	17.94	22.55	14.03	30.26	29.38	38.41	50.74	35.13	52.03	110.51	142.78	137.71	188.34	166.27	156.43	116.56	112.57	139.29	136.82
NCAM1		NM_000615.5	NM_000615.5:1620	Endogenous	mRNA	100	596.34	558.59	524.59	598.55	719.65	708.46	653.92	729.61	818.53	744.39	841.54	825.94	659.19	823.1	843.99	719.81	897.27	824.3	663.28	927.63	811.47	924.85	863.46	911.66
NCF4		NM_000631.4	NM_000631.4:210	Endogenous	mRNA	100	5.92	2.91	2.04	2.14	8.88	3.59	1.88	12.03	7.04	5.88	8.23	9.35	8.27	9.32	8.45	4.42	14.91	7.96	3.58	8.2	15.13	8.34	12.47	4
NCR1		NM_004829.5	NM_004829.5:602	Endogenous	mRNA	100	3.95	8.73	10.21	6.41	8.88	3.59	5.64	16.04	2.11	5.88	2.06	3.34	6.2	3.88	4.93	5.89	5.68	3.32	8.94	2.73	5.34	4.86	4.16	4.67
NFATC1		NM_172389.1	NM_172389.1:1984	Endogenous	mRNA	100	193.52	129.46	163.3	160.33	181.25	204.47	214.21	236.52	200.59	184.14	187.24	186.95	154.98	206.55	184.43	188.42	185.98	206.91	193.08	203.56	188.63	194.56	160.08	191.54
NFATC2		NM_012340.3	NM_012340.3:1815	Endogenous	mRNA	100	27.65	24.73	26.54	17.1	28.43	30.49	24.43	44.1	10.56	21.55	11.66	8.68	12.4	13.98	12.67	20.61	12.78	16.58	33.97	12.98	24.91	14.59	11.78	15.35
NFATC3		NM_004555.2	NM_004555.2:2190	Endogenous	mRNA	100	1646.85	1575.39	1559.49	1581.89	1547.7	1393.61	1668.62	1625.59	1580.06	1690.55	1619.29	1592.46	1793.66	1723.85	1514.82	1607.43	1544.66	1612.8	1585.79	1588.17	1564.22	1591.91	1467.04	1669.16
NFIL3		NM_005384.2	NM_005384.2:1795	Endogenous	mRNA	100	432.45	407.3	406.2	399.75	454.89	473.51	516.75	477.05	439.18	440.76	472.55	550.85	619.93	494.64	500.48	451.91	490.52	507.32	516.68	528.71	504.5	434.98	528.75	539.92
NFKB1		NM_003998.2	NM_003998.2:1675	Endogenous	mRNA	100	132.3	112.01	153.09	160.33	142.15	182.95	139.05	156.35	166.8	219.4	217.41	198.97	237.64	211.99	206.25	179.58	222.19	191.65	205.6	206.29	217.1	235.55	217.6	243.6
NFKB2		NM_002502.2	NM_002502.2:825	Endogenous	mRNA	100	341.61	308.39	293.94	284.31	382.04	369.48	370.18	360.8	229.44	383.95	240.05	249.05	365.76	259.35	202.02	331.2	212.96	207.57	268.17	200.83	258.03	255.71	223.83	246.27
NFKBIA		NM_020529.1	NM_020529.1:945	Endogenous	mRNA	100	1269.7	1173.9	1226.77	1147.94	1188.76	1138.92	1134.96	1202.66	955.07	1488.78	1036.32	1024.91	1527.09	1038.97	786.27	1117.25	729.74	802.42	1253.26	896.89	1009.89	966.54	968.1	971.06
NFKBIZ		NM_001005474.1	NM_001005474.1:2030	Endogenous	mRNA	100	47.39	65.46	51.03	53.44	56.86	43.05	60.13	52.12	35.19	58.77	32.23	54.08	84.72	52.03	39.42	73.6	43.3	51.06	55.42	42.35	43.6	31.27	37.42	38.71
NLRP3		NM_001079821.2	NM_001079821.2:415	Endogenous	mRNA	100	5.92	2.91	6.12	2.14	1.78	3.59	5.64	4.01	6.33	1.96	7.54	9.35	8.27	7.77	5.63	1.47	4.26	7.29	1.79	11.61	6.23	11.12	11.09	10.68
NOD1		NM_006092.1	NM_006092.1:3285	Endogenous	mRNA	100	90.83	72.73	79.61	74.82	94.18	86.09	99.59	104.23	83.75	113.62	101.51	136.88	128.12	109.49	114.74	116.29	94.41	99.47	126.93	103.15	89.87	96.58	96.32	96.77
NOD2		NM_022162.1	NM_022162.1:4080	Endogenous	mRNA	100	15.8	10.18	10.21	12.83	23.1	34.08	18.79	34.08	15.48	7.84	11.66	12.02	12.4	13.98	9.85	19.14	12.07	16.58	12.51	13.66	19.57	19.46	20.79	11.35
NOS2		NM_000625.4	NM_000625.4:605	Endogenous	mRNA	100	45.42	36.37	32.66	23.51	119.05	120.17	90.2	96.21	10.56	7.84	6.86	13.35	26.86	8.54	7.74	19.14	8.52	8.62	30.39	15.03	13.35	15.29	15.94	14.68
NOTCH1		NM_017617.3	NM_017617.3:735	Endogenous	mRNA	100	138.23	120.74	118.39	132.54	115.5	123.76	127.78	136.3	87.98	193.93	85.73	74.78	188.04	87.75	59.83	119.23	62.47	68.31	119.78	68.31	70.29	103.53	80.39	95.44
NOTCH2		NM_024408.3	NM_024408.3:2842	Endogenous	mRNA	100	2381.42	2120.88	2073.88	2054.32	2258.47	2450.03	2591.24	2894.4	1978.41	2219.45	1898.43	1651.88	1907.31	1655.51	2002.64	2592.2	2095.51	1895.97	2376.01	2144.21	1838.27	2032.44	1849.57	2219.76
NT5E		NM_002526.2	NM_002526.2:1214	Endogenous	mRNA	100	33.57	27.64	22.45	36.34	26.65	23.32	63.89	34.08	22.52	25.47	19.2	18.03	41.33	27.95	21.82	35.33	19.88	22.55	41.12	19.81	14.24	20.15	24.25	22.69
PAX5		NM_016734.1	NM_016734.1:2288	Endogenous	mRNA	100	7.9	4.36	12.25	10.69	10.66	17.94	7.52	22.05	14.08	19.59	20.58	26.71	22.73	31.06	19.71	11.78	19.88	19.89	14.3	22.54	23.13	18.76	15.25	23.36
PDCD1		NM_005018.1	NM_005018.1:175	Endogenous	mRNA	100	19.75	20.37	26.54	19.24	12.44	14.35	15.03	24.05	19	21.55	17.83	15.36	16.53	19.41	19.01	8.83	23.43	18.57	32.18	19.13	15.13	27.1	26.33	16.68
PDCD1LG2		NM_025239.3	NM_025239.3:235	Endogenous	mRNA	100	5.92	14.55	14.29	8.55	7.11	7.17	9.4	4.01	7.74	13.71	4.8	7.34	8.27	9.32	4.22	10.3	7.1	5.97	8.94	10.25	4.45	4.86	10.39	4
PDCD2		NM_144781.2	NM_144781.2:288	Endogenous	mRNA	100	1400.02	1264.09	1243.1	1246.27	1226.07	1205.29	1174.42	1168.58	900.88	1424.13	839.48	857.32	1570.48	901.53	883.41	1318.92	822.02	877.36	1480.31	882.55	718.05	689.99	689.52	675.4
PDGFB		NM_033016.2	NM_033016.2:1480	Endogenous	mRNA	100	3.95	5.82	4.08	4.28	7.11	1.79	1.88	6.01	9.85	17.63	10.97	13.35	24.8	8.54	14.78	8.83	16.33	13.26	1.79	14.34	16.02	12.51	14.55	8.01
PDGFRB		NM_002609.3	NM_002609.3:840	Endogenous	mRNA	100	17.77	10.18	10.21	6.41	5.33	5.38	11.27	2	6.33	13.71	7.54	6.01	6.2	13.2	11.26	5.89	9.94	8.62	12.51	8.88	8.9	13.2	8.32	6.67
PECAM1		NM_000442.3	NM_000442.3:1365	Endogenous	mRNA	100	29.62	36.37	28.58	19.24	30.21	39.46	26.31	38.08	33.78	31.34	46.64	32.05	31	42.71	33.08	26.5	29.81	38.46	30.39	43.72	32.03	23.62	27.03	34.04
PIGR		NM_002644.2	NM_002644.2:215	Endogenous	mRNA	100	1.97	2.91	2.04	6.41	5.33	8.97	9.4	6.01	9.15	3.92	11.66	10.02	2.07	9.32	5.63	4.42	10.65	7.29	1.79	15.71	13.35	11.12	11.09	14.02
PLA2G2A		NM_000300.2	NM_000300.2:715	Endogenous	mRNA	100	3.95	14.55	8.16	2.14	5.33	7.17	13.15	14.03	8.45	13.71	7.54	8.01	20.66	8.54	9.15	7.36	13.49	11.27	12.51	13.66	12.46	13.9	11.09	10.01
PLA2G2E		NM_014589.1	NM_014589.1:266	Endogenous	mRNA	100	5.92	8.73	8.16	2.14	3.55	10.76	5.64	8.02	6.33	5.88	2.06	4.01	8.27	11.65	5.63	2.94	4.26	6.63	1.79	4.1	5.34	8.34	12.47	6.67
PLAU		NM_002658.2	NM_002658.2:793	Endogenous	mRNA	100	25.67	16	20.41	17.1	39.09	25.11	31.94	28.06	19	35.26	21.95	19.36	35.13	20.19	14.78	35.33	20.59	21.88	39.33	23.22	16.02	18.07	22.18	22.69
PLAUR		NM_001005376.1	NM_001005376.1:440	Endogenous	mRNA	100	17.77	27.64	24.49	27.79	28.43	28.7	28.19	26.06	28.86	33.3	29.49	34.72	28.93	34.17	28.86	19.14	35.49	33.82	32.18	29.37	43.6	46.56	46.43	52.06
PML		NM_002675.3	NM_002675.3:281	Endogenous	mRNA	100	315.94	283.66	355.17	376.23	282.53	330.02	407.76	384.85	269.56	338.89	235.93	1793.43	2045.76	1685.02	236.52	306.18	237.8	868.74	446.95	364.77	257.14	257.79	406.09	479.86
POU2F2		NM_002698.2	NM_002698.2:908	Endogenous	mRNA	100	11.85	10.18	16.33	12.83	23.1	16.14	24.43	12.03	13.37	13.71	13.03	16.69	16.53	13.2	9.85	13.25	16.33	19.23	8.94	12.98	12.46	21.54	19.4	16.68
PPARG		NM_015869.3	NM_015869.3:1035	Endogenous	mRNA	100	154.02	206.56	128.6	166.74	172.36	130.93	161.6	162.36	225.22	172.38	185.86	200.31	190.11	183.26	212.58	150.14	187.4	218.84	139.45	227.47	233.12	229.3	229.38	216.24
PPBP		NM_002704.2	NM_002704.2:330	Endogenous	mRNA	100	5.92	4.36	2.04	12.83	3.55	8.97	7.52	8.02	6.33	7.84	4.12	8.68	6.2	4.66	8.45	2.94	9.23	1.99	1.79	5.46	6.23	8.34	6.24	8.01
PRDM1		NM_001198.3	NM_001198.3:798	Endogenous	mRNA	100	13.82	5.82	10.21	19.24	10.66	10.76	15.03	4.01	11.26	11.75	8.23	10.02	12.4	13.98	2.82	10.3	13.49	7.29	8.94	8.2	12.46	11.81	11.09	10.01
PRF1		NM_005041.3	NM_005041.3:2120	Endogenous	mRNA	100	1.97	1.45	2.04	14.96	1.78	5.38	9.4	4.01	4.93	5.88	6.17	4.01	8.27	6.21	2.82	4.42	5.68	7.96	5.36	7.51	13.35	5.56	6.24	8.68
PRKCD		NM_006254.3	NM_006254.3:2165	Endogenous	mRNA	100	410.73	430.58	410.29	448.91	367.82	279.8	340.11	322.71	721.41	499.52	628.24	709.76	564.13	656.15	615.93	482.82	583.51	649.89	513.1	620.24	710.93	622.59	668.73	658.05
PSMB10		NM_002801.2	NM_002801.2:221	Endogenous	mRNA	100	15.8	14.55	12.25	12.83	7.11	7.17	9.4	12.03	8.45	7.84	21.26	46.07	47.53	45.04	12.67	10.3	18.46	19.23	16.09	24.59	16.91	18.07	15.94	9.34
PSMB5		NM_001130725.1	NM_001130725.1:716	Endogenous	mRNA	100	9966.03	9929.46	10269.4	10395.6	10286.6	9834.21	9844.47	10062.2	11529.8	10713.3	10705.4	10575.6	10301.1	10625.7	10667.1	10151	10605.4	10486.5	10419.4	11061.9	11439.8	11464.4	11183.3	11386.4
PSMB7		NM_002799.2	NM_002799.2:420	Endogenous	mRNA	100	15441.7	15592.4	15482.6	15709.9	16701.3	16585.2	16800.8	16468.4	7506.15	15205.1	7446.93	7358.68	14936.1	7027.39	7583.27	15728.4	7698.46	7571.93	16295.9	7640.31	7701.86	7516.21	7515.39	7572.93
PSMB8		NM_004159.4	NM_004159.4:1215	Endogenous	mRNA	100	3.95	2.91	6.12	10.69	5.33	1.79	13.15	2	4.22	7.84	5.49	13.35	12.4	10.09	6.34	10.3	6.39	3.32	3.58	6.83	8.9	6.95	7.62	5.34
PSMB9		NM_002800.4	NM_002800.4:455	Endogenous	mRNA	100	29.62	27.64	26.54	29.93	44.42	68.16	45.1	64.14	19	23.51	30.18	880.69	655.06	726.03	33.79	22.08	32.65	230.78	35.76	41.67	36.48	27.1	60.29	76.08
PSMC2		NM_002803.3	NM_002803.3:446	Endogenous	mRNA	100	7645.82	7356.18	7530.06	7554.58	5357.41	5500.91	5823.25	5586.34	8654.06	9712.32	8556.64	8760.84	9687.4	8554.01	7235.54	8294.76	7370.51	7693.95	8172.1	7600.01	6964.24	6603.18	6910.42	6812.77
PSMD7		NM_002811.3	NM_002811.3:580	Endogenous	mRNA	100	8254.01	8790.47	8720.09	8552.88	8150.73	7574.29	7937.21	7398.35	6397.64	8568.31	6459.31	6465.97	8724.45	6340.19	6425.33	8199.08	6415.03	6619.64	8299.04	6225.64	6979.37	6723.39	7073.27	6713.99
PTAFR		NM_000952.3	NM_000952.3:1035	Endogenous	mRNA	100	11.85	20.37	14.29	6.41	17.77	26.9	26.31	14.03	14.78	21.55	19.89	26.04	18.6	15.53	21.12	19.14	21.3	18.57	10.73	15.71	27.58	15.98	18.71	26.7
PTGER4		NM_000958.2	NM_000958.2:1380	Endogenous	mRNA	100	43.44	39.28	48.99	51.3	28.43	57.39	33.82	46.1	39.41	54.85	34.29	46.07	45.46	38.83	42.94	42.69	29.81	46.42	59	53.28	59.61	43.78	55.44	53.39
PTGS2		NM_000963.1	NM_000963.1:495	Endogenous	mRNA	100	19.75	10.18	10.21	12.83	10.66	19.73	5.64	26.06	16.19	17.63	12.35	16.02	16.53	10.09	28.86	23.55	26.97	30.51	35.76	37.57	23.13	25.71	21.48	30.03
PTK2		NM_005607.3	NM_005607.3:1005	Endogenous	mRNA	100	1846.29	1851.77	1839.14	1896.13	1947.5	1994.46	1950.48	2002.43	1870.03	2193.99	1993.76	1812.13	2060.23	1849.64	1946.32	2100.55	2003.94	1973.56	2241.92	2090.92	2177.27	2189.48	2191.9	2155.02
PTPN2		NM_002828.2	NM_002828.2:185	Endogenous	mRNA	100	327.79	349.12	369.46	337.75	316.29	391	398.36	338.75	346.28	303.63	349.1	344.53	322.36	317.59	379.41	373.89	365.58	336.88	341.47	409.85	359.47	370.36	378.37	374.41
PTPN22		NM_015967.4	NM_015967.4:2505	Endogenous	mRNA	100	5.92	8.73	2.04	6.41	15.99	14.35	13.15	16.04	11.26	17.63	8.23	14.69	10.33	10.09	9.85	10.3	16.33	15.92	5.36	10.93	12.46	12.51	12.47	9.34
PTPN6		NM_002831.5	NM_002831.5:1734	Endogenous	mRNA	100	13.82	18.91	8.16	23.51	31.98	26.9	18.79	36.08	14.78	23.51	16.46	20.03	10.33	21.74	19.01	10.3	14.91	21.22	14.3	19.13	18.69	22.24	18.71	24.03
PTPRC_all		NM_080921.2	NM_080921.2:90	Endogenous	mRNA	100	9.87	18.91	12.25	8.55	8.88	17.94	18.79	14.03	16.19	7.84	9.6	13.35	18.6	8.54	14.78	23.55	10.65	16.58	23.24	17.76	12.46	9.03	12.47	8.68
PYCARD		NM_013258.3	NM_013258.3:714	Endogenous	mRNA	100	1.97	7.27	4.08	2.14	3.55	7.17	5.64	6.01	7.74	7.84	6.17	10.68	2.07	4.66	9.85	4.42	9.23	9.28	7.15	4.1	10.68	8.34	8.32	6.01
RAF1		NM_002880.2	NM_002880.2:1990	Endogenous	mRNA	100	2543.34	2411.81	2233.09	2537.43	1688.07	1712.87	1756.93	1801.98	2490.08	2671.96	2521.86	2445.1	2971.52	2591.21	2667.13	2855.69	2696.06	2636.71	2740.72	2737.12	2680.88	2791.22	2734.51	2865.13
RAG1		NM_000448.2	NM_000448.2:2300	Endogenous	mRNA	100	5.92	2.91	10.21	6.41	17.77	16.14	9.4	6.01	13.37	3.92	15.09	19.36	12.4	22.52	21.12	13.25	14.91	27.19	12.51	20.49	24.02	16.68	18.02	21.36
RAG2		NM_000536.3	NM_000536.3:655	Endogenous	mRNA	100	1.97	10.18	20.41	8.55	7.11	5.38	5.64	12.03	14.78	3.92	11.66	13.35	4.13	7.77	12.67	17.66	9.94	8.62	12.51	17.76	20.46	14.59	12.47	12.68
RARRES3		NM_004585.3	NM_004585.3:640	Endogenous	mRNA	100	7.9	5.82	4.08	2.14	3.55	8.97	1.88	2	7.04	9.79	7.54	135.54	111.59	101.72	7.04	2.94	4.97	7.29	5.36	4.1	1.78	5.56	6.93	6.67
RELA		NM_021975.2	NM_021975.2:360	Endogenous	mRNA	100	924.13	1026.98	1043.06	1043.19	1158.55	1051.04	1027.85	1098.43	720	1008.84	700.25	761.84	1122.07	774.18	746.85	1006.85	686.44	714.88	985.09	674.21	730.5	707.36	687.44	720.12
RELB		NM_006509.2	NM_006509.2:250	Endogenous	mRNA	100	15.8	8.73	16.33	6.41	8.88	12.56	9.4	18.04	21.82	9.79	29.49	32.72	22.73	39.6	21.12	11.78	12.07	25.86	5.36	15.71	30.25	32.66	31.18	31.37
RORC		NM_001001523.1	NM_001001523.1:1350	Endogenous	mRNA	100	25.67	11.64	4.08	19.24	15.99	5.38	7.52	14.03	11.26	9.79	16.46	22.7	12.4	17.86	9.15	11.78	6.39	19.23	8.94	15.03	30.25	11.81	12.47	21.36
RUNX1		NM_001754.4	NM_001754.4:635	Endogenous	mRNA	100	29.62	42.18	30.62	42.75	40.87	48.43	46.98	64.14	30.97	47.01	30.18	42.06	72.32	38.83	19.71	25.02	24.14	24.54	33.97	25.96	44.49	31.96	31.88	31.37
S100A8		NM_002964.3	NM_002964.3:115	Endogenous	mRNA	100	3.95	5.82	2.04	8.55	3.55	12.56	5.64	8.02	4.22	3.92	13.03	6.68	12.4	5.44	8.45	4.42	3.55	6.63	1.79	10.25	10.68	8.34	4.85	8.01
S100A9		NM_002965.2	NM_002965.2:75	Endogenous	mRNA	100	5.92	16	18.37	8.55	7.11	14.35	7.52	20.04	14.08	15.67	5.49	12.69	4.13	6.99	9.85	10.3	8.52	15.25	16.09	17.08	16.91	16.68	13.86	14.02
S1PR1		NM_001400.3	NM_001400.3:1065	Endogenous	mRNA	100	25.67	16	6.12	12.83	24.88	23.32	30.07	30.07	20.41	9.79	16.46	18.7	20.66	24.07	20.41	20.61	25.56	21.22	28.61	31.42	28.47	29.88	28.41	19.35
SELE		NM_000450.2	NM_000450.2:1505	Endogenous	mRNA	100	1.97	5.82	12.25	6.41	5.33	1.79	3.76	8.02	7.04	5.88	4.8	8.01	8.27	6.99	5.63	2.94	7.81	9.95	7.15	10.93	13.35	9.03	9.7	9.34
SELL		NR_029467.1	NR_029467.1:1585	Endogenous	mRNA	100	3.95	7.27	4.08	8.55	7.11	8.97	5.64	16.04	11.96	9.79	10.97	17.36	12.4	27.18	16.89	13.25	17.75	23.21	7.15	17.76	26.69	16.68	18.02	25.36
SELPLG		NM_003006.3	NM_003006.3:2297	Endogenous	mRNA	100	1.97	2.91	12.25	6.41	15.99	12.56	5.64	16.04	11.96	11.75	8.23	6.01	12.4	6.21	7.04	8.83	7.81	3.32	5.36	6.83	15.13	5.56	10.39	12.01
SERPING1		NM_000062.2	NM_000062.2:305	Endogenous	mRNA	100	17.77	24.73	30.62	44.89	39.09	71.74	46.98	66.15	21.11	13.71	32.92	845.3	601.33	656.15	37.31	30.91	51.82	218.18	37.54	48.5	29.36	35.44	60.29	83.42
SH2D1A		NM_001114937.2	NM_001114937.2:495	Endogenous	mRNA	100	3.95	2.91	4.08	2.14	3.55	5.38	1.88	2	4.22	1.96	2.06	3.34	4.13	3.11	5.63	2.94	4.26	6.63	10.73	7.51	3.56	2.08	7.62	4.67
SIGIRR		NM_021805.2	NM_021805.2:469	Endogenous	mRNA	100	3.95	8.73	10.21	4.28	8.88	8.97	3.76	2	7.74	11.75	8.23	12.69	6.2	7.77	5.63	10.3	8.52	13.26	8.94	7.51	16.91	9.03	12.47	11.35
SKI		NM_003036.2	NM_003036.2:3335	Endogenous	mRNA	100	1901.58	1930.32	1865.67	1832	1899.53	1836.63	1873.44	1814.01	1796.83	2115.63	1811.32	1695.95	2167.68	1689.68	1823.14	2205.07	1780.34	1738.8	2156.1	1834.08	1753.74	1919.88	1810.76	1950.13
SLAMF1		NM_003037.2	NM_003037.2:580	Endogenous	mRNA	100	1.97	5.82	2.04	2.14	3.55	12.56	1.88	6.01	9.15	5.88	4.8	6.68	2.07	8.54	9.15	1.47	4.97	8.62	7.15	8.2	10.68	4.86	4.85	6.67
SLAMF6		NM_001184714.1	NM_001184714.1:1032	Endogenous	mRNA	100	3.95	4.36	10.21	4.28	7.11	1.79	7.52	4.01	7.74	1.96	11.66	11.35	6.2	6.21	5.63	5.89	5.68	9.28	8.94	9.56	12.46	6.95	9.01	12.68
SLAMF7		NM_021181.3	NM_021181.3:215	Endogenous	mRNA	100	5.92	8.73	10.21	12.83	8.88	8.97	9.4	4.01	16.89	5.88	15.09	14.02	8.27	17.08	11.97	7.36	14.91	16.58	19.67	21.86	16.02	22.24	14.55	17.35
SLC2A1		NM_006516.2	NM_006516.2:2500	Endogenous	mRNA	100	154.02	192.01	208.2	181.7	207.9	208.06	238.64	192.43	206.22	207.65	198.21	227.02	206.64	196.46	220.33	197.25	205.86	218.84	203.81	219.27	209.1	224.44	216.21	226.91
SMAD3		NM_005902.3	NM_005902.3:4220	Endogenous	mRNA	100	424.55	449.49	355.17	393.33	472.66	487.85	466.01	543.2	632.02	497.57	625.49	659.02	491.81	687.21	600.44	471.04	579.25	599.49	488.07	588.82	632.63	649.69	662.49	723.46
SMAD5		NM_005903.5	NM_005903.5:1044	Endogenous	mRNA	100	2351.8	2101.97	2118.79	2133.41	2128.75	2166.65	2191	2208.88	1513.9	2145.02	1574.02	1456.25	1874.25	1448.19	1794.98	2409.67	1808.73	1685.75	2461.82	1773.29	1591.8	1782.29	1678.4	1737.9
SOCS1		NM_003745.1	NM_003745.1:1025	Endogenous	mRNA	100	21.72	23.27	22.45	10.69	15.99	34.08	24.43	22.05	25.34	31.34	20.58	152.9	97.12	140.55	30.27	19.14	27.68	52.39	32.18	28.01	25.8	27.79	24.95	42.05
SOCS3		NM_003955.3	NM_003955.3:1870	Endogenous	mRNA	100	25.67	18.91	26.54	21.38	23.1	43.05	9.4	22.05	27.45	23.51	32.23	126.86	84.72	80.76	27.45	16.19	22.72	32.49	25.03	25.96	31.14	30.57	26.33	29.37
SPP1		NM_000582.2	NM_000582.2:760	Endogenous	mRNA	100	1.97	4.36	14.29	17.1	3.55	10.76	15.03	14.03	7.04	5.88	2.06	4.01	14.46	6.99	4.22	7.36	4.26	7.96	7.15	4.1	8.01	5.56	7.62	10.68
SRC		NM_005417.3	NM_005417.3:1410	Endogenous	mRNA	100	335.69	382.57	385.79	406.16	422.91	437.63	405.88	438.97	275.89	309.51	283.94	251.72	369.89	275.66	244.96	378.31	271.17	271.89	386.17	247.96	290.96	282.8	288.28	284.31
STAT1		NM_007315.2	NM_007315.2:205	Endogenous	mRNA	100	387.03	366.57	555.21	673.37	486.88	538.07	676.47	759.68	246.33	303.63	279.83	3438.64	3965.47	3773.05	270.3	287.04	280.4	2250.76	1008.33	816.97	409.29	407.88	1607.03	1791.96
STAT2		NM_005419.2	NM_005419.2:1965	Endogenous	mRNA	100	436.4	459.67	428.66	442.5	389.15	330.02	428.43	368.82	275.19	419.21	300.4	1627.18	2080.89	1445.08	282.97	410.69	289.62	1122.73	581.04	424.88	348.79	356.46	595.96	628.02
STAT3		NM_139276.2	NM_139276.2:4535	Endogenous	mRNA	100	1344.73	1341.19	1339.04	1310.4	1704.07	1784.61	1691.17	1926.26	825.57	953.99	895.72	1286.65	1454.76	1233.09	848.92	971.52	915.01	994.74	960.06	944.02	1145.14	1276.44	1208.56	1292.74
STAT4		NM_003151.2	NM_003151.2:789	Endogenous	mRNA	100	45.42	66.91	59.2	40.62	60.42	77.12	54.49	66.15	21.11	60.73	13.03	23.37	57.86	29.51	19.01	63.3	25.56	29.18	60.79	26.64	24.91	24.32	19.4	29.37
STAT5A		NM_003152.2	NM_003152.2:3460	Endogenous	mRNA	100	1.97	4.36	2.04	8.55	1.78	7.17	1.88	2	9.85	1.96	6.86	3.34	4.13	9.32	6.34	1.47	9.94	9.95	5.36	9.56	15.13	11.12	7.62	7.34
STAT5B		NM_012448.3	NM_012448.3:200	Endogenous	mRNA	100	657.56	666.23	669.52	654.13	696.55	602.64	644.52	725.6	380.06	619.02	406.02	397.28	675.72	423.97	368.15	604.99	382.62	372.69	593.55	381.84	402.18	403.71	410.25	443.82
STAT6		NM_003153.3	NM_003153.3:2030	Endogenous	mRNA	100	88.86	84.37	120.43	76.96	90.62	104.03	107.11	88.19	99.94	66.6	89.16	124.86	82.66	146.76	95.73	92.74	95.83	101.46	82.24	105.2	163.72	146.61	130.28	144.82
SYK		NM_003177.3	NM_003177.3:1685	Endogenous	mRNA	100	264.6	276.38	253.11	260.8	179.47	191.91	217.97	196.43	334.31	348.69	354.58	369.9	431.88	405.34	331.54	322.37	312.34	332.24	316.44	334.03	484.04	532.95	476.77	541.26
TAGAP		NM_054114.3	NM_054114.3:169	Endogenous	mRNA	100	3.95	5.82	6.12	2.14	12.44	8.97	11.27	8.02	14.08	3.92	10.29	14.69	10.33	17.08	8.45	8.83	7.81	12.6	3.58	9.56	8.9	12.51	11.78	10.68
TAL1		NM_003189.2	NM_003189.2:4635	Endogenous	mRNA	100	33.57	24.73	24.49	21.38	42.65	32.28	30.07	42.09	32.38	21.55	30.18	24.7	24.8	27.18	28.16	29.44	22.01	20.56	17.88	28.01	31.14	25.01	26.33	34.7
TAP1		NM_000593.5	NM_000593.5:2075	Endogenous	mRNA	100	55.29	69.82	69.4	89.78	161.7	184.74	161.6	178.39	45.04	76.4	45.95	590.91	770.78	519.48	45.75	88.32	51.11	300.41	155.54	75.14	56.06	77.82	108.11	119.46
TAP2		NM_000544.3	NM_000544.3:909	Endogenous	mRNA	100	106.63	104.74	106.14	89.78	104.84	114.79	125.9	114.25	163.28	76.4	153.63	607.6	204.58	471.34	198.5	80.96	173.92	279.19	92.97	208.34	210.88	215.4	230.76	256.28
TAPBP		NM_003190.4	NM_003190.4:1536	Endogenous	mRNA	100	233.01	256.02	263.32	262.94	227.45	227.78	197.3	230.51	83.75	174.34	96.02	518.13	861.7	452.7	153.45	335.62	146.94	286.48	395.11	183.75	164.61	204.29	195.42	231.59
TBK1		NM_013254.2	NM_013254.2:1610	Endogenous	mRNA	100	671.38	632.77	549.09	581.45	620.15	613.4	606.94	539.19	458.88	585.72	501.35	493.43	491.81	530.35	560.32	603.52	573.57	556.39	575.68	594.97	549.88	591.32	550.92	560.61
TBX21		NM_013351.1	NM_013351.1:890	Endogenous	mRNA	100	13.82	2.91	10.21	10.69	7.11	14.35	30.07	10.02	14.78	15.67	10.97	17.36	10.33	10.09	14.08	10.3	10.65	11.27	17.88	12.3	13.35	11.12	13.86	13.35
TCF4		NM_003199.1	NM_003199.1:1455	Endogenous	mRNA	100	375.18	391.3	357.21	352.72	337.61	376.65	304.41	370.82	351.91	378.07	329.21	365.9	340.96	350.2	306.91	413.63	324.41	300.41	396.89	275.97	375.48	350.9	378.37	377.75
TCF7		NM_003202.2	NM_003202.2:2420	Endogenous	mRNA	100	201.41	199.29	193.92	168.88	170.58	197.29	197.3	198.44	180.18	184.14	183.81	199.64	200.44	193.35	217.51	238.47	209.41	202.26	203.81	209.71	179.73	198.73	176.02	184.87
TFRC		NM_003234.1	NM_003234.1:1220	Endogenous	mRNA	100	2152.36	2263.44	2165.73	2214.64	2827.08	2559.44	2508.56	2186.83	1628.62	1911.9	1522.58	1586.45	1659.34	1368.21	1642.23	2051.98	1580.86	1429.1	1957.66	1513.72	1669.21	1575.92	1707.51	1625.11
TGFB1		NM_000660.3	NM_000660.3:1260	Endogenous	mRNA	100	339.64	311.3	304.14	337.75	318.07	349.75	287.5	374.83	434.25	293.84	436.2	448.69	318.23	490.75	544.83	385.67	555.82	510.63	362.93	559.45	585.47	575.34	507.26	587.98
TGFBI		NM_000358.2	NM_000358.2:2030	Endogenous	mRNA	100	3.95	13.09	6.12	10.69	8.88	14.35	11.27	6.01	11.96	17.63	18.52	14.69	8.27	13.98	8.45	11.78	12.07	13.93	8.94	15.71	16.02	12.51	13.17	13.35
TGFBR1		NM_004612.2	NM_004612.2:4280	Endogenous	mRNA	100	653.61	632.77	585.83	658.41	808.5	934.46	886.92	918.03	448.33	775.73	485.58	434	679.85	440.28	477.25	725.7	468.51	443.65	666.85	476.11	439.55	510.02	489.25	526.57
TGFBR2		NM_001024847.1	NM_001024847.1:1760	Endogenous	mRNA	100	118.48	100.37	87.77	76.96	161.7	141.69	161.6	162.36	59.12	123.41	67.9	59.42	121.92	52.8	63.35	132.48	75.96	68.31	123.36	79.92	46.27	46.56	52.67	45.38
THY1		NM_006288.2	NM_006288.2:135	Endogenous	mRNA	100	5.92	5.82	4.08	2.14	10.66	7.17	7.52	10.02	6.33	11.75	6.17	10.68	6.2	6.21	3.52	11.78	8.52	5.97	10.73	10.25	12.46	9.73	11.78	13.35
TICAM1		NM_014261.1	NM_014261.1:518	Endogenous	mRNA	100	53.32	42.18	59.2	70.54	60.42	69.95	48.86	76.17	77.42	58.77	70.64	100.82	68.19	83.09	88.69	67.71	76.67	76.93	73.3	75.14	88.09	88.25	96.32	92.1
TIGIT		NM_173799.2	NM_173799.2:1968	Endogenous	mRNA	100	7.9	5.82	14.29	4.28	12.44	10.76	9.4	14.03	6.33	11.75	8.23	14.69	12.4	9.32	11.26	7.36	6.39	9.28	8.94	10.25	16.02	6.25	9.7	11.35
TIRAP		NM_148910.2	NM_148910.2:661	Endogenous	mRNA	100	100.71	88.73	87.77	74.82	69.3	89.68	82.68	90.2	111.91	95.99	89.16	90.14	88.86	83.86	89.4	114.82	97.25	87.54	96.54	94.95	76.52	98.67	90.09	75.42
TLR1		NM_003263.3	NM_003263.3:545	Endogenous	mRNA	100	9.87	14.55	10.21	2.14	10.66	25.11	11.27	4.01	12.67	9.79	11.66	14.69	10.33	16.31	21.82	22.08	15.62	14.59	10.73	17.08	19.57	18.07	18.02	25.36
TLR2		NM_003264.3	NM_003264.3:180	Endogenous	mRNA	100	3.95	4.36	2.04	10.69	5.33	7.17	15.03	12.03	10.56	9.79	7.54	8.01	2.07	11.65	9.85	7.36	14.91	19.23	10.73	16.39	18.69	19.46	15.25	17.35
TLR3		NM_003265.2	NM_003265.2:230	Endogenous	mRNA	100	15.8	36.37	44.91	36.34	42.65	55.6	37.58	30.07	26.04	33.3	17.83	54.75	61.99	48.14	33.08	27.97	26.26	53.72	41.12	24.59	24.91	27.79	30.49	28.03
TLR4		NM_138554.2	NM_138554.2:2570	Endogenous	mRNA	100	17.77	5.82	4.08	12.83	3.55	1.79	3.76	14.03	18.3	3.92	12.35	10.68	12.4	12.42	18.3	5.89	12.07	13.26	12.51	13.66	15.13	15.98	11.78	11.35
TLR5		NM_003268.3	NM_003268.3:215	Endogenous	mRNA	100	17.77	13.09	14.29	12.83	8.88	16.14	16.91	24.05	14.08	25.47	14.4	18.7	24.8	15.53	9.85	14.72	16.33	17.24	12.51	15.03	19.57	18.07	11.78	14.68
TLR7		NM_016562.3	NM_016562.3:4120	Endogenous	mRNA	100	3.95	4.36	4.08	4.28	5.33	5.38	5.64	12.03	7.04	5.88	8.92	7.34	4.13	6.21	7.04	1.47	9.23	6.63	16.09	8.88	16.02	6.95	10.39	9.34
TLR8		NM_016610.2	NM_016610.2:2310	Endogenous	mRNA	100	1.97	4.36	4.08	2.14	7.11	7.17	1.88	2	15.48	15.67	11.66	10.02	12.4	10.87	11.26	10.3	9.94	11.27	10.73	10.93	17.8	13.9	11.78	13.35
TLR9		NM_017442.2	NM_017442.2:985	Endogenous	mRNA	100	7.9	8.73	10.21	8.55	15.99	14.35	7.52	20.04	11.96	17.63	16.46	12.69	12.4	17.08	11.97	14.72	12.78	20.56	26.82	19.81	18.69	16.68	17.32	14.02
TMEM173		NM_198282.1	NM_198282.1:725	Endogenous	mRNA	100	51.34	62.55	42.87	29.93	56.86	86.09	69.53	106.23	66.86	92.07	67.9	114.84	126.05	100.95	61.24	73.6	65.31	75.6	62.57	64.89	94.32	114.65	85.93	102.78
TNF		NM_000594.2	NM_000594.2:1010	Endogenous	mRNA	100	15.8	4.36	4.08	10.69	1.78	3.59	9.4	6.01	19.71	9.79	10.29	15.36	12.4	14.75	13.37	2.94	19.17	18.57	7.15	16.39	20.46	21.54	19.4	21.36
TNFAIP3		NM_006290.2	NM_006290.2:260	Endogenous	mRNA	100	78.99	75.64	69.4	68.41	71.08	78.92	95.83	80.18	45.75	48.97	58.3	66.77	61.99	62.12	68.28	76.54	55.37	71.62	62.57	62.16	69.4	59.06	46.43	58.73
TNFAIP6		NM_007115.2	NM_007115.2:250	Endogenous	mRNA	100	13.82	13.09	14.29	10.69	14.22	10.76	16.91	16.04	19	11.75	19.2	16.02	20.66	24.85	17.6	25.02	17.04	22.55	17.88	25.27	27.58	30.57	20.79	26.7
TNFRSF10C		NM_003841.3	NM_003841.3:682	Endogenous	mRNA	100	17.77	20.37	22.45	14.96	7.11	14.35	26.31	18.04	14.08	17.63	13.03	9.35	26.86	14.75	7.74	16.19	9.23	15.25	21.45	14.34	20.46	22.93	15.25	20.69
TNFRSF11A		NM_003839.2	NM_003839.2:490	Endogenous	mRNA	100	233.01	213.83	169.42	211.63	231	197.29	216.09	206.46	242.81	233.11	221.53	245.71	254.17	215.87	212.58	185.47	253.42	228.79	200.24	265.72	242.02	234.86	273.03	258.95
TNFRSF13B		NM_012452.2	NM_012452.2:160	Endogenous	mRNA	100	1.97	2.91	2.04	2.14	7.11	1.79	1.88	8.02	7.04	7.84	5.49	7.34	6.2	6.99	4.22	2.94	4.97	5.31	8.94	10.25	4.45	6.95	6.24	8.01
TNFRSF13C		NM_052945.3	NM_052945.3:789	Endogenous	mRNA	100	31.59	30.55	34.7	34.2	24.88	35.87	28.19	32.07	26.04	23.51	26.75	29.38	33.06	22.52	25.34	36.8	29.1	27.85	21.45	27.32	24.02	26.4	21.48	26.03
TNFRSF14		NM_003820.2	NM_003820.2:916	Endogenous	mRNA	100	5.92	16	8.16	12.83	10.66	7.17	16.91	6.01	14.78	13.71	14.4	21.37	14.46	11.65	17.6	11.78	14.2	18.57	16.09	15.03	24.02	16.68	11.78	12.68
TNFRSF17		NM_001192.2	NM_001192.2:635	Endogenous	mRNA	100	3.95	8.73	6.12	6.41	3.55	3.59	5.64	6.01	14.78	1.96	8.23	12.02	4.13	10.87	9.85	2.94	9.94	13.26	3.58	10.25	21.35	15.29	8.32	9.34
TNFRSF1B		NM_001066.2	NM_001066.2:835	Endogenous	mRNA	100	5.92	5.82	6.12	10.69	5.33	8.97	3.76	12.03	11.96	7.84	4.12	12.69	8.27	8.54	10.56	5.89	10.65	9.95	3.58	12.98	23.13	17.37	13.17	12.68
TNFRSF4		NM_003327.2	NM_003327.2:200	Endogenous	mRNA	100	5.92	8.73	12.25	8.55	7.11	3.59	11.27	10.02	4.93	15.67	10.29	8.68	16.53	6.21	11.26	7.36	7.81	5.97	8.94	8.2	6.23	6.95	8.32	10.68
TNFRSF8		NM_152942.2	NM_152942.2:2030	Endogenous	mRNA	100	9.87	10.18	6.12	6.41	5.33	3.59	7.52	14.03	10.56	1.96	10.29	12.69	14.46	13.98	7.74	13.25	9.23	13.93	7.15	6.83	9.79	9.03	11.09	11.35
TNFRSF9		NM_001561.4	NM_001561.4:255	Endogenous	mRNA	100	3.95	4.36	4.08	4.28	8.88	7.17	11.27	10.02	11.96	13.71	10.97	16.69	8.27	10.87	11.97	16.19	11.36	13.93	3.58	14.34	15.13	10.42	13.17	14.68
TNFSF10		NM_003810.2	NM_003810.2:115	Endogenous	mRNA	100	13.82	1.45	4.08	2.14	12.44	3.59	1.88	12.03	3.52	3.92	4.8	84.8	45.46	69.89	7.74	7.36	9.23	12.6	1.79	8.2	5.34	4.86	6.93	6.67
TNFSF11		NM_003701.2	NM_003701.2:490	Endogenous	mRNA	100	11.85	14.55	4.08	14.96	12.44	7.17	11.27	16.04	20.41	9.79	7.54	17.36	14.46	24.07	16.89	26.5	19.88	19.23	10.73	21.18	25.8	26.4	14.55	20.02
TNFSF12		NM_003809.2	NM_003809.2:339	Endogenous	mRNA	100	23.7	16	14.29	27.79	10.66	21.52	15.03	14.03	14.78	5.88	10.97	21.37	24.8	12.42	17.6	27.97	12.78	15.92	12.51	17.08	13.35	15.98	13.86	8.01
TNFSF13B		NM_006573.4	NM_006573.4:1430	Endogenous	mRNA	100	15.8	17.46	14.29	17.1	24.88	17.94	13.15	14.03	19.71	21.55	21.95	22.7	31	24.07	16.89	14.72	20.59	22.55	10.73	17.76	26.69	18.07	14.55	21.36
TNFSF15		NM_001204344.1	NM_001204344.1:2338	Endogenous	mRNA	100	5.92	14.55	14.29	4.28	3.55	7.17	13.15	6.01	11.96	7.84	8.23	13.35	8.27	12.42	14.08	5.89	7.1	10.61	12.51	8.88	16.02	11.81	13.86	14.02
TNFSF4		NM_003326.2	NM_003326.2:545	Endogenous	mRNA	100	41.47	45.09	40.82	34.2	33.76	35.87	41.34	56.12	29.56	68.56	29.49	30.71	92.99	28.73	26.75	51.52	22.01	32.49	53.63	40.3	44.49	32.66	37.42	32.03
TNFSF8		NM_001244.3	NM_001244.3:518	Endogenous	mRNA	100	7.9	8.73	2.04	2.14	3.55	1.79	11.27	10.02	8.45	5.88	4.12	4.67	10.33	4.66	6.34	10.3	8.52	7.29	5.36	7.51	11.57	4.86	6.93	8.01
TOLLIP		NM_019009.2	NM_019009.2:1320	Endogenous	mRNA	100	531.18	482.94	510.3	517.32	655.68	622.37	586.27	631.4	472.96	523.03	458.15	507.45	553.8	525.7	556.09	659.46	570.02	596.18	606.07	663.96	557	537.82	517.66	567.29
TP53		NM_000546.2	NM_000546.2:1330	Endogenous	mRNA	100	4701.63	4794.54	4682.56	4474.18	3344.16	3623.03	3636.01	3666.1	3163.63	3339.96	3060.94	3144.85	3333.14	3186.79	4455.78	4892.95	4400.44	4480.29	5029.12	4617.66	4972.93	4904.26	5002.64	4916.7
TRAF1		NM_005658.3	NM_005658.3:3735	Endogenous	mRNA	100	5.92	10.18	8.16	17.1	5.33	10.76	11.27	14.03	7.74	15.67	13.72	8.68	14.46	14.75	6.34	4.42	9.94	11.94	16.09	6.83	14.24	9.03	11.78	7.34
TRAF2		NM_021138.3	NM_021138.3:1325	Endogenous	mRNA	100	714.82	680.78	698.1	724.68	765.85	731.78	710.29	707.56	860.76	642.53	805.87	805.91	644.72	806.01	811.61	644.74	800.02	789.16	691.88	802.63	870.2	798.38	850.98	826.24
TRAF3		NM_145725.1	NM_145725.1:1795	Endogenous	mRNA	100	562.77	606.59	567.46	575.04	559.73	521.93	535.54	563.24	339.24	722.84	398.48	367.9	719.12	333.9	336.47	560.83	310.21	312.35	631.1	339.49	339.89	358.54	342.33	353.05
TRAF4		NM_004295.2	NM_004295.2:1060	Endogenous	mRNA	100	734.57	738.96	767.5	707.57	746.31	796.35	770.42	847.87	600.35	791.4	645.38	649.67	785.24	726.81	546.24	659.46	512.52	505.99	620.37	558.08	683.34	674.7	623.68	691.42
TRAF5		NM_004619.3	NM_004619.3:400	Endogenous	mRNA	100	225.11	224.02	220.45	207.36	174.14	200.88	172.87	174.39	168.91	191.97	177.63	200.98	196.31	201.12	213.99	232.58	217.93	218.18	234.2	219.27	192.19	197.34	189.88	195.55
TRAF6		NM_145803.1	NM_145803.1:1839	Endogenous	mRNA	100	448.24	449.49	455.19	483.12	508.2	455.57	531.78	537.19	434.96	542.62	399.85	462.05	543.47	445.72	399.12	516.67	432.31	425.08	536.34	447.42	452	463.47	449.05	463.84
TYK2		NM_003331.3	NM_003331.3:485	Endogenous	mRNA	100	633.86	679.32	689.93	713.99	550.85	462.74	516.75	505.12	575.01	793.36	580.23	638.32	857.57	647.61	591.99	610.88	577.83	610.77	704.4	633.9	680.68	671.23	697.83	676.74
UBE2L3		NM_198157.1	NM_198157.1:990	Endogenous	mRNA	100	1925.28	1905.6	1826.89	1951.71	1537.04	1544.27	1555.87	1563.45	1874.95	2019.64	1680.33	1837.5	2076.76	1862.84	1919.57	2088.78	1871.2	1969.58	2075.65	1980.95	1862.29	1785.77	1770.57	1823.99
VCAM1		NM_001078.3	NM_001078.3:2535	Endogenous	mRNA	100	5.92	7.27	2.04	8.55	1.78	3.59	1.88	4.01	7.04	3.92	5.49	4.67	2.07	7.77	5.63	7.36	5.68	6.63	3.58	10.93	8.9	7.64	6.93	8.01
VTN		NM_000638.3	NM_000638.3:1346	Endogenous	mRNA	100	19.75	16	12.25	8.55	17.77	16.14	13.15	18.04	16.89	13.71	17.83	18.7	26.86	14.75	7.74	8.83	17.04	17.91	14.3	18.44	19.57	15.98	21.48	17.35
XBP1		NM_005080.2	NM_005080.2:440	Endogenous	mRNA	100	2260.97	2165.98	2378.02	2165.48	1460.63	1346.98	1555.87	1463.23	1337.95	2244.92	1580.19	1473.61	2368.12	1673.37	1319.14	1972.49	1373.58	1385.34	2032.74	1364.8	1558.88	1578.01	1573.07	1585.06
XCL1		NM_002995.1	NM_002995.1:620	Endogenous	mRNA	100	5.92	4.36	10.21	8.55	10.66	12.56	5.64	6.01	9.15	5.88	9.6	16.02	8.27	13.2	11.26	11.78	12.07	10.61	1.79	12.98	15.13	6.25	13.86	9.34
XCR1		NM_005283.2	NM_005283.2:700	Endogenous	mRNA	100	19.75	5.82	28.58	14.96	8.88	14.35	18.79	36.08	16.89	33.3	16.46	16.69	22.73	17.86	8.45	32.38	13.49	19.89	14.3	23.91	26.69	20.15	18.71	20.69
ZAP70		NM_001079.3	NM_001079.3:1175	Endogenous	mRNA	100	23.7	8.73	10.21	10.69	14.22	23.32	7.52	8.02	12.67	23.51	6.86	6.68	12.4	10.09	5.63	16.19	8.52	8.62	10.73	8.88	8.01	16.68	14.55	8.01
ZBTB16		NM_006006.4	NM_006006.4:1585	Endogenous	mRNA	100	90.83	80.01	87.77	81.23	97.73	91.47	122.14	92.2	102.05	94.03	98.76	118.18	138.45	101.72	103.48	111.87	118.55	124.01	121.57	123.64	128.13	150.09	133.75	167.52
ZEB1		NM_001128128.1	NM_001128128.1:1450	Endogenous	mRNA	100	199.44	221.11	163.3	183.84	200.79	218.82	208.58	220.49	120.35	186.1	127.57	141.55	237.64	159.18	132.34	222.27	119.97	127.33	237.78	112.03	124.57	138.97	117.11	146.16
sCTLA4		NM_001037631.1	NM_001037631.1:560	Endogenous	mRNA	100	3.95	1.45	2.04	2.14	8.88	1.79	1.88	10.02	4.22	7.84	6.86	8.01	8.27	3.88	7.04	1.47	6.39	5.97	3.58	5.46	8.9	6.25	10.39	7.34
ABCF1		NM_001090.2	NM_001090.2:850	Housekeeping	mRNA	100	1875.91	2026.33	2055.51	2184.72	2923.03	2780.05	2536.75	2728.03	1309.09	1649.41	1377.87	1496.31	1737.86	1469.15	1410.64	1814.98	1418.31	1447.67	1784.24	1435.85	1540.19	1489.76	1559.21	1502.31
ALAS1		NM_000688.4	NM_000688.4:1615	Housekeeping	mRNA	100	560.8	525.13	534.8	617.79	486.88	520.14	501.71	555.23	539.82	591.59	582.97	597.59	570.33	643.72	637.04	579.97	563.63	599.49	563.16	588.82	646.86	625.37	661.1	619.34
EEF1G		NM_001404.4	NM_001404.4:1150	Housekeeping	mRNA	100	100421	98293.8	102510	103612	99724.3	98960.8	102130	103890	107932	112871	102532	96402.6	109186	96474.1	92694.3	98642.1	92898.3	91926.9	101054	95806.8	100295	99520.1	97457.5	94895.6
G6PD		NM_000402.2	NM_000402.2:1155	Housekeeping	mRNA	100	1625.13	1608.85	1714.62	1532.72	1750.27	1931.69	1766.33	1797.97	1202.81	1541.67	1194.06	1195.18	1593.21	1186.5	1320.54	1760.52	1309.7	1329.63	1707.36	1308.11	1108.66	1072.16	1038.78	1122.56
GAPDH		NM_002046.3	NM_002046.3:972	Housekeeping	mRNA	100	62011.7	60950	61124.3	58243.4	56927.2	54539.2	57715.8	55813.3	70214.3	54113.2	67427.1	70809.2	53576.2	67773.6	70251.4	55309.2	70651.9	72881	56718.4	70079.1	51765.1	49794.5	50915.5	49259.1
GUSB		NM_000181.1	NM_000181.1:1350	Housekeeping	mRNA	100	572.65	519.31	567.46	513.04	376.71	356.92	417.15	322.71	374.43	585.72	396.42	359.89	607.53	369.62	313.95	448.96	314.47	320.3	443.38	289.63	387.05	379.39	371.44	370.4
HPRT1		NM_000194.1	NM_000194.1:240	Housekeeping	mRNA	100	8094.07	9410.15	8771.12	9241.22	9124.49	9296.13	9579.52	8627.06	10964	9537.97	11255.5	11457.7	9234.85	10593.1	11616	10284.9	12283.5	11826.1	10464.1	12055.1	13510.3	13992.9	14282.4	14763.5
OAZ1		NM_004152.2	NM_004152.2:313	Housekeeping	mRNA	100	22775.5	21450.3	22341.1	21408.9	19665.2	18873.8	19425.9	20375	25543.4	20770.4	23675.5	22393.2	19077.2	22584.7	24329.4	20023.7	23595.8	23052.7	20225.5	23835.6	26066.8	24976.5	24484.4	23717.9
POLR1B		NM_019014.3	NM_019014.3:3320	Housekeeping	mRNA	100	900.44	977.53	918.55	985.47	991.52	948.8	903.83	984.17	969.85	859.97	1014.37	1095.69	934.02	1092.55	1095.29	903.81	1073.31	1110.79	945.75	1056.05	1054.38	1076.33	1135.1	1181.96
POLR2A		NM_000937.2	NM_000937.2:3775	Housekeeping	mRNA	100	3655.07	3456.26	3094.49	3061.17	3585.83	3680.43	3746.87	3930.69	2703.34	2656.29	2615.14	2511.21	2504.51	2517.44	3328.81	3861.07	3288.79	3224.27	3509.48	3360.78	3144.45	3422.84	3236.92	3682.69
PPIA		NM_021130.2	NM_021130.2:925	Housekeeping	mRNA	100	1082.11	1067.72	1049.19	966.23	1060.82	1086.91	1056.04	1076.38	1278.12	1116.58	1332.6	1241.25	1111.74	1193.49	1205.81	1136.39	1326.73	1216.89	1122.75	1268.49	1243.01	1253.51	1247.37	1224.67
RPL19		NM_000981.3	NM_000981.3:315	Housekeeping	mRNA	100	52590.7	55119.7	55364	53758.5	64715.4	65808.3	66096.4	64444.4	44062.1	47566.4	43025.3	43420.3	46496.6	42153.5	40519.4	45383.4	40746.8	40418.8	46667.3	40992.6	43108.5	43296.2	44210.9	42858.1
SDHA		NM_004168.1	NM_004168.1:230	Housekeeping	mRNA	100	1135.42	1140.45	1085.93	1145.8	1252.73	1147.89	1091.74	1098.43	1188.03	1386.91	1095.3	1149.77	1314.25	1205.14	943.25	1117.25	993.81	912.5	1167.44	991.16	1006.33	1047.14	1024.92	987.74
TBP		NM_001172085.1	NM_001172085.1:587	Housekeeping	mRNA	100	1571.82	1624.85	1598.27	1688.77	1506.83	1616.02	1587.82	1625.59	2061.46	2266.47	2283.19	2172.02	2475.58	2462.31	2142.72	2043.15	2113.26	2194.39	2027.38	2144.89	1748.4	1774.65	1671.47	1713.2
TUBB		NM_178014.2	NM_178014.2:320	Housekeeping	mRNA	100	17033.3	16153.9	17003.4	16654.7	14529.9	14628.5	15181	14909	26197.3	15738	24017.7	25650.9	16450.8	24020.5	25922.4	16661.6	25492.6	26871.8	16848.4	26393.1	26189.5	26239.7	26711	26137.9
NEG_A		ERCC_00096.1	ERCC_00096.1:230	Negative	SYSTEM	100	19	23	28	8	19	31	19	21	25	27	17	25	21	26	18	30	20	25	27	23	25	26	23	22
NEG_B		ERCC_00041.1	ERCC_00041.1:440	Negative	SYSTEM	95.83	5	8	2	1	8	5	2	7	17	5	12	21	5	15	9	7	16	20	5	23	19	16	21	23
NEG_C		ERCC_00019.1	ERCC_00019.1:140	Negative	SYSTEM	95.83	1	4	3	7	3	6	5	3	16	4	13	14	3	9	8	4	15	18	4	17	13	17	20	14
NEG_D		ERCC_00076.1	ERCC_00076.1:355	Negative	SYSTEM	87.5	3	5	2	2	3	1	4	7	8	3	13	11	1	10	15	2	12	10	1	14	12	12	14	8
NEG_E		ERCC_00098.1	ERCC_00098.1:785	Negative	SYSTEM	100	3	7	6	4	9	8	7	3	30	8	26	31	4	27	29	12	22	42	4	29	28	27	21	30
NEG_F		ERCC_00126.1	ERCC_00126.1:220	Negative	SYSTEM	100	13	13	8	8	8	10	8	9	43	9	42	42	8	31	40	10	30	23	15	32	37	41	29	29
NEG_G		ERCC_00144.1	ERCC_00144.1:15	Negative	SYSTEM	79.17	1	2	1	4	1	1	2	3	11	1	8	7	2	5	7	2	4	7	2	6	9	7	6	7
NEG_H		ERCC_00154.1	ERCC_00154.1:115	Negative	SYSTEM	79.17	2	4	1	1	1	1	2	2	18	3	12	19	1	13	12	4	16	12	3	22	16	14	14	21
POS_A		ERCC_00117.1	ERCC_00117.1:385	Positive	SYSTEM	100	24192	30444	23699	21566	26631	25819	24386	25197	67569	23385	65388	70188	23844	62040	65763	31205	64617	69966	26622	66933	68727	67085	67552	72447
POS_B		ERCC_00112.1	ERCC_00112.1:695	Positive	SYSTEM	100	6788	9234	6931	6576	8232	7866	7317	7695	21180	7180	21433	22389	7221	19909	21609	9589	21278	22405	8199	21717	21872	21392	21718	23348
POS_C		ERCC_00002.1	ERCC_00002.1:850	Positive	SYSTEM	100	1904	2584	1983	1869	2251	2187	2070	2130	4935	2066	4827	5070	1933	4620	4789	2702	4839	5315	2295	5033	5143	4770	4971	5346
POS_D		ERCC_00092.1	ERCC_00092.1:540	Positive	SYSTEM	100	438	647	487	439	534	536	494	544	1229	476	1209	1306	486	1165	1207	657	1255	1284	563	1287	1316	1241	1177	1305
POS_E		ERCC_00035.1	ERCC_00035.1:485	Positive	SYSTEM	100	61	84	60	66	64	63	69	70	255	74	254	255	85	256	252	100	255	286	83	256	258	281	272	286
POS_F		ERCC_00034.1	ERCC_00034.1:195	Positive	SYSTEM	100	35	61	42	39	35	28	41	26	124	33	153	140	40	144	138	58	123	138	33	137	136	137	110	124

## Sheet: DEG WT - vs + dox
20 threshold	WT: ND / NL3	WT: D / NL3
None
20 threshold	WT: ND / L3	WT: D / L3
IKZF2	55.11	21.38

## Sheet: DEG WT - vs + L3
20 threshold	WT: ND / NL3	WT: ND / L3	Unique DEG (i.e. not present in FLAG-Iso1)	Total DEGs
IFI35	39.49	91.85		IFI35
IFITM1	189.57	540.92		IFITM1
TLR3	20	44.91		TLR3
				EDNRB
				IKZF2
20 threshold	WT: D / NL3	WT: D / L3		TMEM173
EDNRB	20.37	55.58	*
IFITM1	160.01	895.69
IKZF2	50.91	21.38	*
TMEM173	62.55	29.93

## Sheet: DEG EV - vs. + dox
20 threshold	EV: ND / NL3	EV: D / NL3
PTGER4	28.43	57.39
20 threshold	EV: ND / L3	EV: D / L3
None

## Sheet: DEG EV - vs. + L3
20 threshold	EV: ND / NL3	EV: ND / L3	Unique DEG (i.e. not present in FLAG-Iso1)	Total DEGs
IFITM1	243.44	695.26		IFITM1
IRF7	31.98	67.65		IRF7
NT5E	26.65	63.89	*	NT5E
				CXCL2
20 threshold
	EV: D / NL3	EV: D / L3
CXCL2	48.43	22.05	*
IFITM1	278.01	805.78
IRF7	25.11	82.18

## Sheet: DEG Iso1 - vs. + dox
		20 threshold	Iso1: ND / NL3	Iso1: D / NL3 (R1)
		FAS	22.52	48.97
		HLA-DRB1	23.93	64.64
		IL11RA	44.34	20
		LIF	38.01	97.95
		MR1	20	47.01
		NOTCH1	87.98	193.93
		PSMB7	7506.15	15205.1
		STAT4	21.11	60.73
		TAP2	163.28	76.4
		TAPBP	83.75	174.34
		TGFBR2	59.12	123.41
		TNFSF4	29.56	68.56
		TRAF3	339.24	722.84
		20 threshold	Iso1: ND / L3	Iso1: D / L3 (R1)
		CXCL1	20	45.46
		CXCL10	496.77	208.71
		GBP1	1963.03	960.89
		IRF7	84.8	254.17
		ITGA4	24.04	51.66
		LIF	44.07	138.45
		NOTCH1	74.78	188.04
		NT5E	20	41.33
		PSMB7	7358.68	14936.1
		STAT4	23.37	57.86
		TAP2	607.6	204.58
		TGFBR2	59.42	121.92
		TNFSF4	30.71	92.99

## Sheet: DEG Iso1 - vs + L3
20 threshold	Iso1: ND / NL3	Iso1: ND / L3	Total DEGs
B2M	7836.23	27895	B2M
BST2	20	1350.75	BST2
C2	20	54.08	C2
CFH	20	80.79	CFH
CFI	23.93	54.08	CFI
CSF1	66.86	419.31	CSF1
CXCL10	20	496.77	CXCL10
CXCL11	20	61.43	CXCL11
FAS	22.52	60.76	FAS
GBP1	28.86	1963.03	GBP1
HLA-A	714.37	1431.54	HLA-A
HLA-B	774.19	2594.67	HLA-B
HLA-C	1371.02	4601.76	HLA-C
IDO1	20	67.44	IDO1
IFI16	20	246.38	IFI16
IFI35	20	922.76	IFI35
IFIH1	20	533.49	IFIH1
IFIT2	20	3274.38	IFIT2
IFITM1	145.69	31817.1	IFITM1
IRF1	58.42	287.78	IRF1
IRF3	85.86	73.45	IRF3
IRF7	20	84.8	IRF7
IRF8	62.64	148.9	IRF8
LAMP3	34.49	412.64	LAMP3
MX1	20	40.06	MX1
PML	269.56	1793.43	PML
PSMB9	20	880.69	PSMB9
RARRES3	20	135.54	RARRES3
SERPING1	21.11	845.3	SERPING1
SOCS1	25.34	152.9	SOCS1
SOCS3	27.45	126.86	SOCS3
STAT1	246.33	3438.64	STAT1
STAT2	275.19	1627.18	STAT2
TAP1	45.04	590.91	TAP1
TAP2	163.28	607.6	TAP2
TAPBP	83.75	518.13	TAPBP
TLR3	26.04	54.75	TLR3
TNFSF10	20	84.8	TNFSF10
			CISH
20 threshold	Iso1: D / NL3 (R1)	Iso1: D / L3 (R1)	PSMB10
B2M	9490.96	30488
BST2	20	1746.13
CFH	20	76.46
CFI	25.47	57.86
CISH	29.38	68.19
CSF1	94.03	386.42
CXCL10	20	208.71
GBP1	20	960.89
HLA-A	834.5	1810.19
HLA-B	1096.99	3620.38
HLA-C	1075.45	3453
IDO1	20	49.59
IFI16	20	301.7
IFI35	23.51	1225.39
IFIH1	20	407.09
IFIT2	20	2593.36
IFITM1	162.59	38857.1
IRF1	72.48	231.44
IRF7	27.42	254.17
LAMP3	35.26	407.09
MX1	20	53.73
PML	338.89	2045.76
PSMB10	20	47.53
PSMB9	23.51	655.06
RARRES3	20	111.59
SERPING1	20	601.33
SOCS1	31.34	97.12
SOCS3	23.51	84.72
STAT1	303.63	3965.47
STAT2	419.21	2080.89
TAP1	76.4	770.78
TAP2	76.4	204.58
TAPBP	174.34	861.7
TNFSF10	20	45.46

## Sheet: DEG Iso2 - vs + dox
20 threshold	Iso2: ND / NL3	Iso2: D / NL3 (R1)
HLA-DPA1	43.64	91.26
HLA-DRB1	46.46	97.15
ITGA4	26.75	78.02
PSMB7	7583.27	15728.4
STAT4	20	63.3
TAP2	198.5	80.96
TAPBP	153.45	335.62
TGFBR2	63.35	132.48
20 threshold	Iso2: ND / L3	Iso2: D / L3 (R1)
BST2	559.04	114.42
CD24	37.14	76.88
CSF1	207.57	80.45
GBP1	203.59	25.03
HLA-C	2555.14	1230.02
IFI16	51.06	20
IFI35	358.77	107.27
IFIH1	250.67	41.12
IFIT2	395.9	35.76
IFITM1	13653.7	2515.46
IL32	23560.7	48151.2
IRF1	163.14	78.66
IRF3	78.25	171.63
LAMP3	115.39	37.54
PSMB7	7571.93	16295.9
PSMB9	230.78	35.76
SERPING1	218.18	37.54
STAT1	2250.76	1008.33
STAT4	29.18	60.79
TAP2	279.19	92.97
TRAF3	312.35	631.1

## Sheet: DEG Iso2 - vs + L3
			Unique DEG (i.e. not present in FLAG-Iso1)	Total DEGs
20 threshold	Iso2: ND / NL3	Iso2: ND / L3		B2M
B2M	8832.72	19880.1		BST2
BST2	20	559.04		CSF1
CSF1	62.65	207.57		GBP1
GBP1	27.45	203.59		IFI16
IFI16	20	51.06		IFI35
IFI35	20	358.77		IFIH1
IFIH1	20	250.67		IFIT2
IFIT2	20	395.9		IFITM1
IFITM1	130.93	13653.7		IRF1
IRF1	46.46	163.14		IRF7
IRF7	20	89.53		LAMP3
LAMP3	31.68	115.39		PML
PML	236.52	868.74		PSMB9
PSMB9	33.79	230.78		SERPING1
SERPING1	37.31	218.18		STAT1
STAT1	270.3	2250.76		STAT2
STAT2	282.97	1122.73		TAP1
TAP1	45.75	300.41		CXCL2
				MR1
20 threshold	Iso2: D / NL3 (R1)	Iso2: D / L3 (R1)
BST2	20	114.42
CXCL2	20	41.12	*
IFI35	38.27	107.27
IFIH1	20	41.12
IFITM1	173.7	2515.46
IRF7	23.55	84.03
MR1	42.69	20	*
STAT1	287.04	1008.33

[truncated: 5 more sheets: DEG Iso3 - vs + dox, DEG Iso3 - vs + L3, 61 Significant DEGs, DEGs specific to dox, DEGs specific to L3]
